# Supplementary material
Source: publisher site journal article supplement (https://www.dovepress.com/article/292978)
Supplement: Supplementary file 1 [file 04_Mar_2021_292978_Revised_Appendix_Table_1_List_of_Approving_Committees_V2.pdf › 04_Mar_2021_292978_Revised_Appendix_Table_1_List_of_Approving_Committees_V2.pdf]

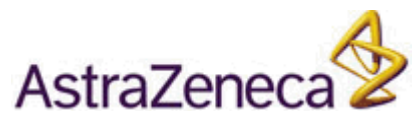

---

**Clinical Study Report Appendix 12.1.3**

Drug Substance    ticagrelor

Study Code        D5135C00001

---

---

**Appendix 12.1.3**  
**Independent Ethics Committees/Institutional Review Boards Consulted,**  
**and Samples of Written Subject Information and Consent Form**

---

### 12.1.3.1 Independent Ethics Committees/Institutional Review Boards consulted

| Country Name  | Country IRB/IEC Name and Address                                                                             | Chairman of Country IRB/IEC | Country IRB/IEC Actual Date |
|---------------|--------------------------------------------------------------------------------------------------------------|-----------------------------|-----------------------------|
| Argentina 201 | Comité Independiente Ética Ensayos Farmacología Clínica, Uriburu 774 1°, C1027AAP, Buenos Aires, Argentina   | Zieher, Dr Luis             | 30-Jul-2012                 |
| 202           | Instituto Cardiovascular de Buenos Aires, Blanco Encalada 1525, 1428, CABA, Argentina                        | Maretta, Alejandro          | 17-Dec-2012                 |
| 203           | Comité de Ética en Investigación- Instituto Ave Pulmo, Carlos M. Alvear 3345, 7600, Mar del Plata, Argentina | Rubio, Alberto              | 29-Jan-2013                 |
| 206           | EC Instituto de Investigaciones Clinicas, Paraguay 160, S2000CVD, Rosario, Argentina                         | Quijano, Dr Cesar           | 29-Nov-2012                 |
| 207           | Centro Medico Framingham, St. 9 N° 431, B1902COS, La Plata, Argentina                                        | Cuadrado, Dr Jesus          | 17-Dec-2012                 |
| 209           | Instituto de Investigaciones, Ethics Committee, Paraguay 160, 2000, Rosario, Argentina                       | Quijano, Dr Cesar           | 29-Nov-2012                 |
| 210           | Comité de Ética en Investigación Fundación OncoSalud, Siria 16 P.A, 2700, Pergamino, Argentina               | Polizzi, Nelida             | 12-Dec-2012                 |
| 211           | EC Instituto de Investigaciones Clinicas, Paraguay 160, S2000CVD, Rosario, Argentina                         | Quijano, Dr Cesar           | 29-Nov-2012                 |
| 212           | Comité de Ética CAICI- CIAP, Rodriguez 1198, 2000, Rosario, Argentina                                        | Alessandro, Dr Hugo         | 06-Dec-2012                 |
| 214           | Comité Independiente Ética Ensayos Farmacología Clínica, Uriburu 774 1°, C1027AAP, Buenos Aires, Argentina   | Zieher, Dr Luis             | 03-Dec-2012                 |
| 217           | EC Comite independiente de etica Fundacion Rusculleda, Av Colon 2057, X5003DCE, Cordoba, Argentina           | Alfonso, Dr Carlos          | 22-Nov-2012                 |
| 218           | EC Comite independiente de etica Fundacion Rusculleda, Av Colon 2057, X5003DCE, Cordoba, Argentina           | Alfonso, Dr Carlos          | 22-Nov-2012                 |
| 219           | Comite de Bioetica Fundacion Favaloro, Av Belgrano 1746, C1093AAS, CABA, Argentina                           | Cambariere, Dr              | 22-May-2013                 |
| 220           | EC Comite independiente de Etica Clinica Chutro, Colon 1864, 5000, Cordoba, Argentina                        | Moises, Dr Olga             | 28-Nov-2012                 |

| <b>Country Name</b> | <b>Country IRB/IEC Name and Address</b>                                                                                                                                                                | <b>Chairman of Country IRB/IEC</b> | <b>Country IRB/IEC Actual Date</b> |
|---------------------|--------------------------------------------------------------------------------------------------------------------------------------------------------------------------------------------------------|------------------------------------|------------------------------------|
| 221                 | Comité Independiente Ética Ensayos Farmacología Clínica, Uruburu 774 1°, C1027AAP, Buenos Aires, Argentina                                                                                             | Zieher, Dr Luis                    | 03-Dec-2012                        |
| 222                 | Comité de BioÉtica de la Escuela Latinoamericana de Bioetic, Calle 42 nro 614, La Plata, Argentina                                                                                                     | Mainetti, Dr Jose                  | 21-Jan-2013                        |
| 223                 | EC Instituto de Investigaciones Clinicas, Paraguay 160, S2000CVD, Rosario, Argentina                                                                                                                   | Quijano, Dr Cesar                  | 21-Mar-2013                        |
| 224                 | Comité de Ética de la Investigación Institucional, Hipolito Irigoyen 1051, Hospital Zonal General Agudos "Prof. Dr. Ramón Carrillo", B1702FWM, Ciudadela, Argentina                                    | Pestchanker, Fabiana               | 08-May-2013                        |
| 225                 | Comite de Ética para la Investigación Clínica Hospital Itali, Comite de Ética para la Investigación Clínica Hospital Italiano de La Plata, Avenida 51 entre 29 y 30 s/n, B1900AXI, La Plata, Argentina | Gomez, Sandra                      | 07-Feb-2013                        |
| Brazil<br>701       | CONEP – Comissão Nacional de Ética em Pesquisa, SEPN 510 NORTE, BLOCO “A”, 3º andar, Edifício Ex-INAN, Unidade II – Ministério da Saúde, 70750-521, Brazil                                             | Pestana, Jose                      | 29-Oct-2012                        |
| 704                 | CONEP – Comissão Nacional de Ética em Pesquisa, SEPN 510 NORTE, BLOCO “A”, 3º andar, Edifício Ex-INAN, Unidade II – Ministério da Saúde, 70750-521, Brazil                                             | Parro, Adelino                     | 29-Aug-2013                        |
| 705                 | Universidade Federal de Minas Gerais, Av. Antônio Carlos, 6627 2º andar - sala 2005 Unidade Administrativa II, Campus Pampulha, 31270-901, Belo Horizonte, Brazil                                      | Amaral, Dra Maria                  | 19-Sep-2013                        |
| 706                 | Cardioresearch Cardiologia Assistencial e de Pesquisa, Rua Timbira, 3156 - 9º andar, sala 902, Comitê de Ética em Pesquisa do Hospital Vera Cruz, Barro Preto, 30140-062, Belo Horizonte, Brazil       | Neuenschwander, Dr Fernando        | 10-Sep-2013                        |
| 709                 | CONEP – Comissão Nacional de Ética em Pesquisa, SEPN 510 NORTE, BLOCO “A”, 3º andar, Edifício Ex-INAN, Unidade II – Ministério da Saúde, 70750-521, Brazil                                             | Salinas, Dr Luiz                   | 18-Aug-2013                        |
| 710                 | Faculdade de Medicina do ABC, Av. Lauro Gomes, 200, Chairman: Dr. Elie Fiss, 09060-650, Santo André, Brazil                                                                                            | Cruz, Dr Felipe                    | 18-Aug-2013                        |

| <b>Country Name</b> | <b>Country IRB/IEC Name and Address</b>                                                                                                                        | <b>Chairman of Country IRB/IEC</b> | <b>Country IRB/IEC Actual Date</b> |
|---------------------|----------------------------------------------------------------------------------------------------------------------------------------------------------------|------------------------------------|------------------------------------|
| 711                 | CONEP – Comissão Nacional de Ética em Pesquisa, SEPN 510 NORTE, BLOCO “A”, 3º andar, Edifício Ex-INAN, Unidade II – Ministério da Saúde, 70750-521, Brazil     | Barata, Dr Antonio                 | 16-Sep-2013                        |
| 712                 | Loema - Instituto de Pesquisa Clínica, Av Julio de Mesquita 571, CEP Irmandade de Misericórdia de Campinas, 13025-061, Campinas, Brazil                        | De Carvalho, Dr Joao               | 13-Sep-2013                        |
| 715                 | CONEP – Comissão Nacional de Ética em Pesquisa, SEPN 510 NORTE, BLOCO “A”, 3º andar, Edifício Ex-INAN, Unidade II – Ministério da Saúde, 70750-521, Brazil     | Furtado, Sandra                    | 10-Dec-2013                        |
| 716                 | Instituto de Molestias Cardiovasculares de Tatui, Rua Príncipe de Gales, 821, Comitê de Ética da Faculdade de Medicina do ABC, 09060-650, Santo André, Brazil  | Cruz, Dr Felipe                    | 16-Sep-2013                        |
| 717                 | CONEP – Comissão Nacional de Ética em Pesquisa, SEPN 510 NORTE, BLOCO “A”, 3º andar, Edifício Ex-INAN, Unidade II – Ministério da Saúde, 70750-521, Brazil     | Ribas, Dra Carmen                  | 22-Oct-2013                        |
| 718                 | CONEP – Comissão Nacional de Ética em Pesquisa, SEPN 510 NORTE, BLOCO “A”, 3º andar, Edifício Ex-INAN, Unidade II – Ministério da Saúde, 70750-521, Brazil     | Ferreira, Dr Andre                 | 18-Aug-2013                        |
| 719                 | CONEP – Comissão Nacional de Ética em Pesquisa, SEPN 510 NORTE, BLOCO “A”, 3º andar, Edifício Ex-INAN, Unidade II – Ministério da Saúde, 70750-521, Brazil     | Lourencao, Dra Luciana             | 10-Sep-2013                        |
| 720                 | Hosp. Clínicas de Porto Alegre, Rua Ramiros Barcelos, 2350 - 2º andar, Comitê de Ética em Pesquisa do HCPA, 90035-903, Porto Alegre, Brazil                    | De Macedo, Prof. Amarilio          | 04-Sep-2013                        |
| 722                 | Hospital e Maternidade Celso Pierro, Rodovia Dom Pedro I km 136 Pq das Universidades, Comite de Etica em Pesquisa da PUC Campinas, 13086-900, Campinas, Brazil | Bianchini, Prof. David             | 28-Oct-2013                        |
| 723                 | CONEP – Comissão Nacional de Ética em Pesquisa, SEPN 510 NORTE, BLOCO “A”, 3º andar, Edifício Ex-INAN, Unidade II – Ministério da Saúde, 70750-521, Brazil     | Pires, Dr Leonardo                 | 18-Oct-2013                        |

| <b>Country Name</b> | <b>Country IRB/IEC Name and Address</b>                                                                                                                                          | <b>Chairman of Country IRB/IEC</b> | <b>Country IRB/IEC Actual Date</b> |
|---------------------|----------------------------------------------------------------------------------------------------------------------------------------------------------------------------------|------------------------------------|------------------------------------|
| 724                 | HRPC - ULBRATECH - ULBRA, Rua José de Alencar, 286 - subsolo, Comitê de Ética em Pesquisa em Seres Humanos do Hospital Mãe de Deus, 90880-180, Porto Alegre, Brazil              | De Azevedo, Dr. Andre              | 19-Nov-2013                        |
| 725                 | Hospital LifeCenter, Av. do Contorno, 4747 20 andar, Bairro Funcionarios, 30110-090, Belo Horizonte, Brazil                                                                      | Murad, Dr Andre                    | 18-Aug-2013                        |
| 726                 | Centro Multidisciplinar de Estudos Clinicos, Rua Príncipe de Gales, 821, Comitê de Ética da Faculdade de Medicina do ABC, 09060-650, Santo André, Brazil                         | Cruz, Dr Felipe                    | 27-Sep-2013                        |
| 727                 | CONEP – Comissão Nacional de Ética em Pesquisa, SEPN 510 NORTE, BLOCO “A”, 3º andar, Edifício Ex-INAN, Unidade II – Ministério da Saúde, 70750-521, Brazil                       | Akel, Naim                         | 24-Sep-2013                        |
| 728                 | CONEP – Comissão Nacional de Ética em Pesquisa, SEPN 510 NORTE, BLOCO “A”, 3º andar, Edifício Ex-INAN, Unidade II – Ministério da Saúde, 70750-521, Brazil                       | Farsky, Dr Pedro                   | 17-Sep-2013                        |
| 729                 | Centro Mineiro de Pesquisa, Rua Catulo Breviglieli s/n, Bairro Santa Catarina, 36036-110, Juiz de Fora, Brazil                                                                   | Fofano, Dra Gisele                 | 30-Oct-2013                        |
| 730                 | Hospital Sao Lucas da PUCRS, Comite de Etica em Pesquisa PUCRS, Av. Ipiranga, 6690 predio 40 sala 505, Chairman: Dr. Rodolfo Herberto Schneider, 90619-900, Porto Alegre, Brazil | Schneider, Rodolfo                 | 06-Dec-2013                        |
| 731                 | CEP Hospital Universitário Pedro Ernesto - UERJ, Boulevard 28 de setembro, 77, Térreo, 20551030, Rio de Janeiro, Brazil                                                          | Sanjuliani, Dr Antonio Felipe      | 19-Nov-2013                        |
| Bulgaria 901        | Ethics Committee for Multi-centres Trials, 5 Sveta Nedelya square, 1000, Sofia, Bulgaria                                                                                         | Oskar, Dr. Aleksandar              | 19-Apr-2013                        |
| 902                 | Ethics Committee for Multi-centres Trials, 5 Sveta Nedelya square, 1000, Sofia, Bulgaria                                                                                         | Oskar, Dr. Aleksandar              | 21-Jun-2013                        |
| 903                 | Ethics Committee for Multi-centres Trials, 5 Sveta Nedelya square, 1000, Sofia, Bulgaria                                                                                         | Oskar, Dr. Aleksandar              | 21-Jun-2013                        |
| 904                 | Ethics Committee for Multi-centres Trials, 5 Sveta Nedelya square, 1000, Sofia, Bulgaria                                                                                         | Oskar, Dr. Aleksandar              | 19-Apr-2013                        |
| 905                 | Ethics Committee for Multi-centres Trials, 5 Sveta Nedelya square, 1000, Sofia, Bulgaria                                                                                         | Oskar, Dr. Aleksandar              | 07-Dec-2012                        |

| <b>Country Name</b> | <b>Country IRB/IEC Name and Address</b>                                                                                                                               | <b>Chairman of Country IRB/IEC</b> | <b>Country IRB/IEC Actual Date</b> |
|---------------------|-----------------------------------------------------------------------------------------------------------------------------------------------------------------------|------------------------------------|------------------------------------|
| 906                 | Ethics Committee for Multi-centres Trials, 5 Sveta Nedelya square, 1000, Sofia, Bulgaria                                                                              | Oskar, Dr. Aleksandar              | 07-Dec-2012                        |
| 907                 | Ethics Committee for Multi-centres Trials, 5 Sveta Nedelya square, 1000, Sofia, Bulgaria                                                                              | Oskar, Dr. Aleksandar              | 19-Apr-2013                        |
| 908                 | Ethics Committee for Multi-centres Trials, 5 Sveta Nedelya square, 1000, Sofia, Bulgaria                                                                              | Oskar, Dr. Aleksandar              | 07-Dec-2012                        |
| 909                 | Ethics Committee for Multi-centres Trials, 5 Sveta Nedelya square, 1000, Sofia, Bulgaria                                                                              | Oskar, Dr. Aleksandar              | 19-Apr-2013                        |
| 910                 | Ethics Committee for Multi-centres Trials, 5 Sveta Nedelya square, 1000, Sofia, Bulgaria                                                                              | Oskar, Dr. Aleksandar              | 19-Apr-2013                        |
| 911                 | Ethics Committee for Multi-centres Trials, 5 Sveta Nedelya square, 1000, Sofia, Bulgaria                                                                              | Oskar, Dr. Aleksandar              | 19-Apr-2013                        |
| 912                 | Ethics Committee for Multi-centres Trials, 5 Sveta Nedelya square, 1000, Sofia, Bulgaria                                                                              | Oskar, Dr. Aleksandar              | 19-Apr-2013                        |
| 913                 | Ethics Committee for Multi-centres Trials, 5 Sveta Nedelya square, 1000, Sofia, Bulgaria                                                                              | Oskar, Dr. Aleksandar              | 19-Apr-2013                        |
| 914                 | Ethics Committee for Multi-centres Trials, 5 Sveta Nedelya square, 1000, Sofia, Bulgaria                                                                              | Oskar, Dr. Aleksandar              | 19-Apr-2013                        |
| 915                 | Ethics Committee for Multi-centres Trials, 5 Sveta Nedelya square, 1000, Sofia, Bulgaria                                                                              | Oskar, Dr. Aleksandar              | 19-Apr-2013                        |
| 916                 | Ethics Committee for Multi-centres Trials, 5 Sveta Nedelya square, 1000, Sofia, Bulgaria                                                                              | Oskar, Dr. Aleksandar              | 19-Apr-2013                        |
| 917                 | Ethics Committee for Multi-centres Trials, 5 Sveta Nedelya square, 1000, Sofia, Bulgaria                                                                              | Oskar, Dr. Aleksandar              | 19-Apr-2013                        |
| 918                 | Ethics Committee for Multi-centres Trials, 5 Sveta Nedelya square, 1000, Sofia, Bulgaria                                                                              | Oskar, Dr. Aleksandar              | 19-Apr-2013                        |
| 919                 | Ethics Committee for Multi-centres Trials, 5 Sveta Nedelya square, 1000, Sofia, Bulgaria                                                                              | Oskar, Dr. Aleksandar              | 21-Jun-2013                        |
| 920                 | Ethics Committee for Multi-centres Trials, 5 Sveta Nedelya square, 1000, Sofia, Bulgaria                                                                              | Oskar, Dr. Aleksandar              | 21-Jun-2013                        |
| 921                 | Ethics Committee for Multi-centres Trials, 5 Sveta Nedelya square, 1000, Sofia, Bulgaria                                                                              | Oskar, Dr. Aleksandar              | 03-Oct-2013                        |
| Canada<br>1001      | St. Michael's Hospital, Research Ethics Board,<br>30 Bond St, M5B 1W8, Toronto, Canada                                                                                | Mcdowell, Dr Brenda                | 08-Mar-2013                        |
| 1002                | University of Western Ontario Support<br>Services Building, Office of Research Ethics,<br>Room 5150, Office of Research Ethics, Room<br>5150, N6G 1G9, London, Canada | Gilbert, Dr Joseph                 | 18-Jan-2013                        |

| <b>Country Name</b> | <b>Country IRB/IEC Name and Address</b>                                                                                                               | <b>Chairman of Country IRB/IEC</b> | <b>Country IRB/IEC Actual Date</b> |
|---------------------|-------------------------------------------------------------------------------------------------------------------------------------------------------|------------------------------------|------------------------------------|
| 1003                | IRB Services, 372 Hollandview Trail, Suite 300, L4G 0A5, Aurora, Canada                                                                               | Blajchman, Dr Morris               | 15-Nov-2012                        |
| 1004                | IRB Services, 372 Hollandview Trail, Suite 300, L4G 0A5, Aurora, Canada                                                                               | Blajchman, Dr Morris               | 13-Nov-2012                        |
| 1005                | IRB Services, 372 Hollandview Trail, Suite 300, L4G 0A5, Aurora, Canada                                                                               | Blajchman, Dr Morris               | 30-Nov-2012                        |
| 1006                | Institut de Cardiologie de Montréal, Research Ethics Committee, 5000 rue Bélanger, H1T 1C8, Montréal, Canada                                          | Carrier, Dr Michel                 | 01-May-2013                        |
| 1008                | CIUSSS du Saguenay–Lac-Saint-Jean, Comite d'ethique de la recherche, 305 rue St Vallier, G7H 5H6, Chicoutimi, Canada                                  | Gagnon, Ms Christine               | 07-May-2013                        |
| 1009                | Hollandview Professional Building, 372 Hollandview Trail, L4G 0A5, Aurora, Canada                                                                     | Blajchman, Dr Morris               | 28-May-2013                        |
| 1010                | IRB Services, 372 Hollandview Trail, Suite 300, L4G 0A5, Aurora, Canada                                                                               | Blajchman, Dr Morris               | 29-Nov-2012                        |
| 1011                | University of Manitoba, Bannatayne Campus Biomedical Research Ethics Board, Pathology Building, P126-770 Bannatayne Avenue, R3E 0W3, Winnipeg, Canada | Nicolle, Dr Lindsay                | 05-Feb-2013                        |
| 1012                | University of BC Clinical Research Ethics Board, 828 West 10th Ave, Room 210, VGH Research Pavilion, V5Z 1L8, Vancouver, Canada                       | Loewen, Dr Peter                   | 11-Dec-2012                        |
| 1013                | Health Research Ethics Authority, Ethics Office, Health Research Ethics Authority, Ste 200 2nd Fl 95 Bonaventure Ave, A1B 2X5, St. John's, Canada     | Youngusband, Dr. Ban               | 04-Jan-2013                        |
| 1014                | IRB Services, 372 Hollandview Trail, Suite 300, L4G 0A5, Aurora, Canada                                                                               | Blajchman, Dr Morris               | 30-Nov-2012                        |
| 1016                | CISSSL - Centre Hospitalier Regional de Lanaudiere, CER CISSSL de Lanaudiere, 1000 Sainte-Anne Blvd, J6E 6J2, Saint-Charles-Borromeo, Canada          | Mayer, Ms Caroline                 | 12-Dec-2012                        |
| 1018                | Centre Hospitalier Universitaire de Quebec, Comite de la recherche du CHU de Quebec, Local A0-124 10 rue de L Espinay, G1L 3L5, Quebec, Canada        | Deleury, Maitre                    | 02-May-2013                        |

| <b>Country Name</b> | <b>Country IRB/IEC Name and Address</b>                                                                                                                                                                                             | <b>Chairman of Country IRB/IEC</b> | <b>Country IRB/IEC Actual Date</b> |
|---------------------|-------------------------------------------------------------------------------------------------------------------------------------------------------------------------------------------------------------------------------------|------------------------------------|------------------------------------|
| 1019                | Ottawa Health Science Network Research Ethics Board, Ottawa Hospital, Civic Campus, 725 Parkdale Avenue, Civic Box 411, LOEB Building, K1Y 4E9, Ottawa, Canada                                                                      | Saginur, Dr Raphael                | 10-Jul-2013                        |
| 1020                | Centre Hospitalier Regional de Trois-Rivieres, 1991 du Carmel Blvd, G8Z 3R9, Trois-Rivieres, Canada                                                                                                                                 | Lemire, Mr. Francois               | 22-Jul-2013                        |
| 1021                | Hollandview Professional Building, 372 Hollandview Trail, L4G 0A5, Aurora, Canada                                                                                                                                                   | Blajchman, Dr Morris               | 09-Jul-2013                        |
| 1022                | Hollandview Professional Building, 372 Hollandview Trail, L4G 0A5, Aurora, Canada                                                                                                                                                   | Blajchman, Dr Morris               | 09-Jul-2013                        |
| 1023                | Hollandview Professional Building, Hollandview Professional Bldg, 300- 372 Hollandview Trail, L4G 0A5, Aurora, Canada                                                                                                               | Blajchman, Dr Morris               | 11-Jul-2013                        |
| 1024                | Hollandview Professional Building, Hollandview Professional Bldg, 300- 372 Hollandview Trail, L4G 0A5, Aurora, Canada                                                                                                               | Blajchman, Dr Morris               | 18-Jul-2013                        |
| 1025                | IRB Services, 372 Hollandview Trail, Suite 300, L4G 0A5, Aurora, Canada                                                                                                                                                             | Blajchman, Dr Morris               | 18-Sep-2013                        |
| 1026                | Health Research Ethics Authority, Ethics Office, Health Research Ethics Authority, Ste 200 2nd Fl 95 Bonaventure Ave, A1B 2X5, St. John's, Canada                                                                                   | Youngusband, Dr. Ban               | 27-Sep-2013                        |
| 1027                | IRB Services, 372 Hollandview Trail, Suite 300, L4G 0A5, Aurora, Canada                                                                                                                                                             | Blajchman, Dr Morris               | 22-Aug-2013                        |
| 1029                | Hollandview Professional Building, Hollandview Professional Bldg, 300- 372 Hollandview Trail, L4G 0A5, Aurora, Canada                                                                                                               | Blajchman, Dr Morris               | 17-Sep-2013                        |
| 1030                | IRB Services, 372 Hollandview Trail, Suite 300, L4G 0A5, Aurora, Canada                                                                                                                                                             | Blajchman, Dr Morris               | 23-Sep-2013                        |
| Chile<br>1201       | Comite de Etica Hospital Clinico Universidad de Chile, Santos Dumont 999, Independencia, Santiago, Chile                                                                                                                            | Navarro, Mr. Carlos                | 19-Dec-2012                        |
| 1202                | Comite Etica Investigacion Escuela de Medicina Pontificia Un, Comite de Etica en Investigacion Escuela de Medicina, Pontificia Universidad Catolica de Chile, Marcoleta 391, Primer piso, Santiago Centro, 8330024, Santiago, Chile | Soto, Mr Emiliano                  | 12-Aug-2013                        |

| <b>Country Name</b> | <b>Country IRB/IEC Name and Address</b>                                                                                                 | <b>Chairman of Country IRB/IEC</b> | <b>Country IRB/IEC Actual Date</b> |
|---------------------|-----------------------------------------------------------------------------------------------------------------------------------------|------------------------------------|------------------------------------|
| 1203                | Comite de etica cientifico SSM Oriente,<br>Avenida Salvador 364, 7500710, Santiago,<br>Chile                                            | Stuardo, Mr Andres                 | 23-Oct-2012                        |
| 1204                | Comite Evaluacion Etico Cientifico SSMSO,<br>Avenida Concha y Toro 3459, Puente Alto,<br>Santiago, Santiago, Chile                      | Michaud, Dr Patricio               | 21-Nov-2012                        |
| 1205                | Comite Etico Cientifico Servicio de Salud<br>Araucania Sur, Andres Bello 636, Temuco,<br>Chile                                          | Valdes, Mr Patricio                | 26-Sep-2012                        |
| 1207                | Comite Etico Cientifico SS Viña del Mar-<br>Quillota, Calle Limache #1307, Esquina<br>Peñablanca 2°, Viña del Mar, Chile                | Fossa, Ms Paola                    | 18-Apr-2013                        |
| 1209                | Comite de etica cientifico SSM Oriente,<br>Avenida Salvador 364, 7500710, Santiago,<br>Chile                                            | Stuardo, Mr Andres                 | 23-Oct-2012                        |
| 1210                | Comite Etico Cientifico Servicio de Salud<br>Araucania Sur, Andres Bello 636, Temuco,<br>Chile                                          | Valdes, Mr Patricio                | 26-Oct-2012                        |
| 1213                | Comite Etico Cientifico SMS Bio Bio,<br>Caupolican 518, oficina 510, 4030576,<br>Concepcion, Chile                                      | Diaz, Mrs Mariela                  | 13-Dec-2012                        |
| 1214                | Comite Etica Servicio de Salud Talcahuano,<br>Thompson 86, Talcahuano, Chile                                                            | Cortes, Mrs Patricia               | 17-May-2013                        |
| China<br>1301       | Zhongshan Hospital Affiliated to<br>FuDanUniversity<br>No. 180, Fenglin Road<br>200032, Shanghai, China                                 | Wang, Dr, Yuqi                     | 03-Jun-2013                        |
| 1302                | Wuxi People's Hospital<br>No 299, Qingyang Road, Wuxi, Jiangsu<br>province, China.<br>214023, Wuxi, JiangSu, China                      | Xie, Zhijuan                       | 31-May-2013                        |
| 1303                | The First Affiliated Hospital of Xi'an Jiaotong<br>University<br>No277, Yantaxi Road<br>710061, xi'an, shanxi China                     | Yang, Lan                          | 28-Jun-2013                        |
| 1304                | Nanjing Drum Tower Hospital<br>No.321, Zhongshan Road, Nanjing, Jiangsu<br>Province, China<br>2100008, Nanjing, Jiangsu Province, China | He, Zhongzheng                     | 18-Jul-2013                        |

| <b>Country Name</b> | <b>Country IRB/IEC Name and Address</b>                                                                                                                                                                                         | <b>Chairman of Country IRB/IEC</b> | <b>Country IRB/IEC Actual Date</b> |
|---------------------|---------------------------------------------------------------------------------------------------------------------------------------------------------------------------------------------------------------------------------|------------------------------------|------------------------------------|
| 1305                | Fujian general hospital of Nanjing Military Command<br>No.156 North West er'huan Road<br>350025, Fuzhou, Fujian, China                                                                                                          | Ling, Prof. Xiaoming               | 23-Sep-2013                        |
| 1306                | Peking University 3rd Hospital<br>No.49 North Guarden Road, Haidian District, Beijing<br>100191, Beijing, Beijing,China                                                                                                         | Li, Pro Xuan                       | 26-Aug-2013                        |
| 1307                | PLA General Hospital<br>No 28 Fu Xing Road<br>100853, Beijing, China                                                                                                                                                            | He, Profession Kunlun              | 09-Jul-2013                        |
| 1308                | Anzhen Hospital, Capital University of Medical Science<br>No 2 An Zhen Road Chao Yang District Bei Jing<br>Cardiovascular Department (Atten. Dr. Fei Yuan)<br>Anzhenli, Andingmenwai, Chaoyang District, 100029, Beijing, China | Wu, Qinghua                        | 20-Jun-2013                        |
| 1309                | Union Hosipital of Tongji Medical College, Huazhong Univ.<br>No. 1277, Jiefang Road, Wuhan<br>430022, Hubei, China                                                                                                              | Chen, Prof Hui                     | 01-Jul-2013                        |
| 1310                | WUHAN, Tongji Hospital<br>1095 Jiefang Dadao, Hankou.<br>430022, Wuhan, China                                                                                                                                                   | Chen, Prof Hui                     | 01-Jul-2013                        |
| 1311                | Renji Hospital Affiliated to Shanghai 2nd Medical University<br>No.145, East Zhongshan Road, Shanghai, 200001, Shanghai, China                                                                                                  | Kong, Xianming                     | 27-Jun-2013                        |
| 1312                | Shanghai Changhai Hospital<br>Changhai Road 168Respiratory Dept, 11th floor<br>200000, Shanghai, China                                                                                                                          | Xiang, Yaojun                      | 24-Jul-2013                        |
| 1313                | The Affiliated hospital of Medical College Qingdao Universit<br>NO.16, Jiangsu Road<br>266003, Qingdao, Shandong, China                                                                                                         | Wang, Pro Haofu                    | 23-Jul-2013                        |
| 1314                | Tianjin People Hospital<br>No.190, Jieyuan Road, Hongqiao, Tianjin<br>300121, Tianjin,China                                                                                                                                     | Jiang, Tao                         | 21-Jun-2013                        |

| <b>Country Name</b> | <b>Country IRB/IEC Name and Address</b>                                                                                                                | <b>Chairman of Country IRB/IEC</b> | <b>Country IRB/IEC Actual Date</b> |
|---------------------|--------------------------------------------------------------------------------------------------------------------------------------------------------|------------------------------------|------------------------------------|
| 1316                | Xiangya hospital of Center-South university<br>No87 Xiangya Road<br>410008, Changsha, Hunan,China                                                      | Lei, Guanghua                      | 03-Aug-2013                        |
| 1317                | the Third Xiangya Hospital of Central South University<br>No.138 Tongzipo Road, Yuelu DistrictYuelu district<br>410013, Changsha, Hunan,China          | Yuan, Hong                         | 06-Sep-2013                        |
| 1319                | The second hospital of Shanxi Medical University<br>No.382, wuyi road, Taiyuan<br>030001, Taiyuan, shanxi,China                                        | Hao, Prof. Zheng                   | 29-Jul-2013                        |
| 1320                | Jiangsu Province Hospital<br>No.300, Guangzhou Road<br>210029, Nanjing<br>Jiangsu Province,China                                                       | Zhang, Ec Chairman<br>Fumin        | 22-Jul-2013                        |
| 1321                | Xin Hua Hospital / Shanghai Second Medical University<br>No.1665 KongJiangRoad YangPu District<br>CN-200092, Shanghai,China                            | Wu, Yeming                         | 09-Aug-2013                        |
| 1322                | Tianjin General Hospital<br>No.154 Anshan Road Heping distNo. 154 An Shan Street, He Ping District<br>CN-300052, Tianjin, China                        | Shao, Zonghong                     | 28-Jun-2013                        |
| 1323                | Shanghai First People's hospital<br>No.100,Haining Road, Hongkou District<br>200080, Shanghai, China                                                   | Liu, Ec Chairman<br>Guohua         | 17-Jul-2013                        |
| 1324                | Renji Hospital Affiliated to Shanghai Jiaotongl Univ.<br>No. 160, Pujian Road, Pudong New Area<br>200127, Shanghai, China                              | Kong, Xianming                     | 27-Jun-2013                        |
| 1325                | The First affiliated Hospital of Haerbin Medical University<br>No.23 Youzhen Road Nangang District,<br>Haerbin, Heilongjiang<br>150001, Haerbin, China | Zhao, Shiguang                     | 25-Jul-2013                        |
| 1326                | Beijing Shijitan Hospital<br>No.10 Tie Hospital Road, Yanffangdian,<br>Haidian District, Beijing<br>100038, Beijing,China                              | Zhou, Baoli                        | 09-Aug-2013                        |

| <b>Country Name</b>    | <b>Country IRB/IEC Name and Address</b>                                                                                                                                | <b>Chairman of Country IRB/IEC</b> | <b>Country IRB/IEC Actual Date</b> |
|------------------------|------------------------------------------------------------------------------------------------------------------------------------------------------------------------|------------------------------------|------------------------------------|
| Czech Republic<br>1901 | Multicentricka eticka komise VFN a 1.LF UK,<br>Multicentricka eticka komise VFN a 1.LF UK,<br>Na Bojisti 1, 128 00, Praha 2, Czech Republic                            | Sedivy, Dr. Josef                  | 18-Oct-2012                        |
| 1902                   | Multicentricka eticka komise VFN a 1.LF UK,<br>Multicentricka eticka komise VFN a 1.LF UK,<br>Na Bojisti 1,128 00, Praha 2, Czech Republic                             | Sedivy, Dr. Josef                  | 18-Oct-2012                        |
| 1903                   | Multicentricka eticka komise VFN a 1.LF UK,<br>Multicentricka eticka komise VFN a 1.LF UK,<br>Na Bojisti 1, 128 00, Praha 2, Czech Republic                            | Sedivy, Dr. Josef                  | 18-Oct-2012                        |
| 1904                   | Multicentricka eticka komise VFN a 1.LF UK,<br>Multicentricka eticka komise VFN a 1.LF UK,<br>Na Bojisti 1, 128 00, Praha 2, Czech Republic                            | Sedivy, Dr. Josef                  | 18-Oct-2012                        |
| 1905                   | Multicentricka eticka komise VFN a 1.LF UK,<br>Multicentricka eticka komise VFN a 1.LF UK,<br>Na Bojisti 1, 128 00, Praha 2, Czech Republic                            | Sedivy, Dr. Josef                  | 18-Oct-2012                        |
| 1906                   | Multicentricka eticka komise VFN a 1.LF UK,<br>Multicentricka eticka komise VFN a 1.LF UK,<br>Na Bojisti 1, 128 00, Praha 2, Czech Republic                            | Sedivy, Dr. Josef                  | 18-Oct-2012                        |
| 1907                   | Multicentricka eticka komise VFN a 1.LF UK,<br>Multicentricka eticka komise VFN a 1.LF UK,<br>Na Bojisti 1, 128 00, Praha 2, Czech Republic                            | Sedivy, Dr. Josef                  | 18-Oct-2012                        |
| 1908                   | Eticka komise Fakultni nemocnice Olomouc a<br>LF UP v Olomouci, I. P. Pavlova 6, 775 20,<br>Olomouc, Czech Republic                                                    | Horcicka, Dr. Vladko               | 20-Aug-2012                        |
| 1908                   | Multicentricka eticka komise VFN a 1.LF UK,<br>Multicentricka eticka komise VFN a 1.LF UK,<br>Na Bojisti 1, 128 00, Praha 2, Czech Republic                            | Horcicka, Dr. Vladko               | 20-Aug-2012                        |
| 1910                   | Multicentricka eticka komise VFN a 1.LF UK,<br>Multicentricka eticka komise VFN a 1.LF UK,<br>Na Bojisti 1, 128 00, Praha 2, Czech Republic                            | Sedivy, Dr. Josef                  | 18-Oct-2012                        |
| 1911                   | Eticka komise nemocnice Slany, Eticka komise<br>nemocnice Slany, Politickych veznu 576, 274<br>01, Slany, Czech Republic                                               | Marcinek, Dr. Gabriel              | 06-Aug-2012                        |
| 1911                   | Multicentricka eticka komise VFN a 1.LF UK,<br>Multicentricka eticka komise VFN a 1.LF UK,<br>Na Bojisti 1, 128 00, Praha 2, Czech Republic                            | Marcinek, Dr. Gabriel              | 06-Aug-2012                        |
| 1913                   | Eticka komise nem. Milosrdnych sester<br>sv.K.Boromejskeho, Eticka komise nem.<br>Milosrdnych sester sv.K.Boromejskeho,<br>Vlasska 36, 118 33, Praha 1, Czech Republic | Markova, Dr. Pavlina               | 04-Dec-2012                        |

| <b>Country Name</b> | <b>Country IRB/IEC Name and Address</b>                                                                                                                                                                                                         | <b>Chairman of Country IRB/IEC</b> | <b>Country IRB/IEC Actual Date</b> |
|---------------------|-------------------------------------------------------------------------------------------------------------------------------------------------------------------------------------------------------------------------------------------------|------------------------------------|------------------------------------|
| 1913                | Multicentricka eticka komise VFN a 1.LF UK,<br>Multicentricka eticka komise VFN a 1.LF UK,<br>Na Bojisti 1, 128 00, Praha 2, Czech Republic                                                                                                     | Markova, Dr. Pavlina               | 04-Dec-2012                        |
| 1914                | Ethics Committee FN Hradec Kralove,<br>Sokoloska 581, 50005, Hradec Kralove, Czech Republic                                                                                                                                                     | Vortel, Dr. Jiri                   | 06-Sep-2012                        |
| 1914                | Multicentricka eticka komise VFN a 1.LF UK,<br>Multicentricka eticka komise VFN a 1.LF UK,<br>Na Bojisti 1, 128 00, Praha 2, Czech Republic                                                                                                     | Vortel, Dr. Jiri                   | 06-Sep-2012                        |
| 1915                | Eticka komise Krajske nemocnice Liberec,<br>Eticka komise Krajske nemocnice Liberec,<br>Husova 10, 460 01, Liberec 1, Czech Republic                                                                                                            | Rissova, Mrs Marie                 | 19-Sep-2012                        |
| 1915                | Multicentricka eticka komise VFN a 1.LF UK,<br>Multicentricka eticka komise VFN a 1.LF UK,<br>Na Bojisti 1, 128 00, Praha 2, Czech Republic                                                                                                     | Rissova, Mrs Marie                 | 19-Sep-2012                        |
| 1916                | Eticka komise nemocnice Kladno, Eticka<br>komise nemocnice Kladno, Vancurova 1548,<br>155 05, Kladno, Czech Republic                                                                                                                            | Svarcova, Dr. Marie                | 13-Aug-2012                        |
| 1916                | Multicentricka eticka komise VFN a 1.LF UK,<br>Multicentricka eticka komise VFN a 1.LF UK,<br>Na Bojisti 1, 128 00, Praha 2, Czech Republic                                                                                                     | Svarcova, Dr. Marie                | 13-Aug-2012                        |
| 1917                | Eticka komise FN u sv. Anny v Brne, Eticka<br>komise FN u sv. Anny v Brne, Pekarska 53,<br>656 91, Brno, Czech Republic                                                                                                                         | Soska, Dr. Vladimir                | 12-Sep-2012                        |
| 1917                | Multicentricka eticka komise VFN a 1.LF UK,<br>Multicentricka eticka komise VFN a 1.LF UK,<br>Na Bojisti 1, 128 00, Praha 2, Czech Republic                                                                                                     | Soska, Dr. Vladimir                | 12-Sep-2012                        |
| 1918                | Eticka komise FN u sv. Anny v Brne, Eticka<br>komise FN u sv. Anny v Brne, Pekarska 53,<br>656 91, Brno, Czech Republic                                                                                                                         | Soska, Dr. Vladimir                | 14-Nov-2012                        |
| France<br>2301      | Comité de Protection des Personnes Sud Ouest<br>et Outre-Mer IV,87025,France,Limoges<br>Cedex, France                                                                                                                                           | Demiot, Dr Claire                  | 17-Nov-2012                        |
| 2302                | Comité de Protection des Personnes Sud-Ouest<br>et Outre-Mer IV, Comité de Protection des<br>Personnes Sud-Ouest et Outre-Mer IV, Cabanis<br>Haut - Centre Hospitalier Esquirol, 15 rue du<br>Docteur Marcland, 87025, Limoges Cedex,<br>France | Demiot, Dr Claire                  | 17-Dec-2012                        |

| <b>Country Name</b> | <b>Country IRB/IEC Name and Address</b>                                                                                                                                                                                          | <b>Chairman of Country IRB/IEC</b> | <b>Country IRB/IEC Actual Date</b> |
|---------------------|----------------------------------------------------------------------------------------------------------------------------------------------------------------------------------------------------------------------------------|------------------------------------|------------------------------------|
| 2303                | Comité de Protection des Personnes Sud-Ouest et Outre-Mer IV, Comité de Protection des Personnes Sud-Ouest et Outre-Mer IV, Cabanis Haut - Centre Hospitalier Esquirol, 15 rue du Docteur Marcland, 87025, Limoges Cedex, France | Demiot, Dr Claire                  | 17-Dec-2012                        |
| 2304                | Comité de Protection des Personnes Sud-Ouest et Outre-Mer IV, Comité de Protection des Personnes Sud-Ouest et Outre-Mer IV, Cabanis Haut - Centre Hospitalier Esquirol, 15 rue du Docteur Marcland, 87025, Limoges Cedex, France | Demiot, Dr Claire                  | 17-Dec-2012                        |
| 2305                | Comité de Protection des Personnes Sud-Ouest et Outre-Mer IV, Comité de Protection des Personnes Sud-Ouest et Outre-Mer IV, Cabanis Haut - Centre Hospitalier Esquirol, 15 rue du Docteur Marcland, 87025, Limoges Cedex, France | Demiot, Dr Claire                  | 17-Dec-2012                        |
| 2306                | Comité de Protection des Personnes Sud-Ouest et Outre-Mer IV, Comité de Protection des Personnes Sud-Ouest et Outre-Mer IV, Cabanis Haut - Centre Hospitalier Esquirol, 15 rue du Docteur Marcland, 87025, Limoges Cedex, France | Demiot, Dr Claire                  | 17-Dec-2012                        |
| 2307                | Comité de Protection des Personnes Sud-Ouest et Outre-Mer IV, Comité de Protection des Personnes Sud-Ouest et Outre-Mer IV, Cabanis Haut - Centre Hospitalier Esquirol, 15 rue du Docteur Marcland, 87025, Limoges Cedex, France | Demiot, Dr Claire                  | 17-Dec-2012                        |
| 2308                | Comité de Protection des Personnes Sud-Ouest et Outre-Mer IV, Comité de Protection des Personnes Sud-Ouest et Outre-Mer IV, Cabanis Haut - Centre Hospitalier Esquirol, 15 rue du Docteur Marcland, 87025, Limoges Cedex, France | Demiot, Dr Claire                  | 17-Dec-2012                        |
| 2309                | Comité de Protection des Personnes Sud-Ouest et Outre-Mer IV, Comité de Protection des Personnes Sud-Ouest et Outre-Mer IV, Cabanis Haut - Centre Hospitalier Esquirol, 15 rue du Docteur Marcland, 87025, Limoges Cedex, France | Demiot, Dr Claire                  | 17-Dec-2012                        |

| <b>Country Name</b> | <b>Country IRB/IEC Name and Address</b>                                                                                                                                                                                          | <b>Chairman of Country IRB/IEC</b> | <b>Country IRB/IEC Actual Date</b> |
|---------------------|----------------------------------------------------------------------------------------------------------------------------------------------------------------------------------------------------------------------------------|------------------------------------|------------------------------------|
| 2310                | Comité de Protection des Personnes Sud-Ouest et Outre-Mer IV, Comité de Protection des Personnes Sud-Ouest et Outre-Mer IV, Cabanis Haut - Centre Hospitalier Esquirol, 15 rue du Docteur Marcland, 87025, Limoges Cedex, France | Demiot, Dr Claire                  | 17-Dec-2012                        |
| 2311                | Comité de Protection des Personnes Sud-Ouest et Outre-Mer IV, Comité de Protection des Personnes Sud-Ouest et Outre-Mer IV, Cabanis Haut - Centre Hospitalier Esquirol, 15 rue du Docteur Marcland, 87025, Limoges Cedex, France | Demiot, Dr Claire                  | 17-Dec-2012                        |
| 2312                | Comité de Protection des Personnes Sud-Ouest et Outre-Mer IV, Comité de Protection des Personnes Sud-Ouest et Outre-Mer IV, Cabanis Haut - Centre Hospitalier Esquirol, 15 rue du Docteur Marcland, 87025, Limoges Cedex, France | Demiot, Dr Claire                  | 17-Dec-2012                        |
| 2313                | Comité de Protection des Personnes Sud-Ouest et Outre-Mer IV, Comité de Protection des Personnes Sud-Ouest et Outre-Mer IV, Cabanis Haut - Centre Hospitalier Esquirol, 15 rue du Docteur Marcland, 87025, Limoges Cedex, France | Demiot, Dr Claire                  | 17-Dec-2012                        |
| 2314                | Comité de Protection des Personnes Sud-Ouest et Outre-Mer IV, Comité de Protection des Personnes Sud-Ouest et Outre-Mer IV, Cabanis Haut - Centre Hospitalier Esquirol, 15 rue du Docteur Marcland, 87025, Limoges Cedex, France | Demiot, Dr Claire                  | 17-Dec-2012                        |
| 2315                | Comité de Protection des Personnes Sud-Ouest et Outre-Mer IV, Comité de Protection des Personnes Sud-Ouest et Outre-Mer IV, Cabanis Haut - Centre Hospitalier Esquirol, 15 rue du Docteur Marcland, 87025, Limoges Cedex, France | Demiot, Dr Claire                  | 17-Dec-2012                        |
| 2317                | Comité de Protection des Personnes Sud-Ouest et Outre-Mer IV, Comité de Protection des Personnes Sud-Ouest et Outre-Mer IV, Cabanis Haut - Centre Hospitalier Esquirol, 15 rue du Docteur Marcland, 87025, Limoges Cedex, France | Demiot, Dr Claire                  | 17-Dec-2012                        |

| <b>Country Name</b> | <b>Country IRB/IEC Name and Address</b>                                                                                                                                                                                          | <b>Chairman of Country IRB/IEC</b> | <b>Country IRB/IEC Actual Date</b> |
|---------------------|----------------------------------------------------------------------------------------------------------------------------------------------------------------------------------------------------------------------------------|------------------------------------|------------------------------------|
| 2318                | Comité de Protection des Personnes Sud-Ouest et Outre-Mer IV, Comité de Protection des Personnes Sud-Ouest et Outre-Mer IV, Cabanis Haut - Centre Hospitalier Esquirol, 15 rue du Docteur Marcland, 87025, Limoges Cedex, France | Demiot, Dr Claire                  | 17-Dec-2012                        |
| 2319                | Comité de Protection des Personnes Sud-Ouest et Outre-Mer IV, Comité de Protection des Personnes Sud-Ouest et Outre-Mer IV, Cabanis Haut - Centre Hospitalier Esquirol, 15 rue du Docteur Marcland, 87025, Limoges Cedex, France | Demiot, Dr Claire                  | 17-Dec-2012                        |
| 2320                | Comité de Protection des Personnes Sud-Ouest et Outre-Mer IV, Comité de Protection des Personnes Sud-Ouest et Outre-Mer IV, Cabanis Haut - Centre Hospitalier Esquirol, 15 rue du Docteur Marcland, 87025, Limoges Cedex, France | Demiot, Dr Claire                  | 17-Dec-2012                        |
| 2322                | Comité de Protection des Personnes Sud-Ouest et Outre-Mer IV, Comité de Protection des Personnes Sud-Ouest et Outre-Mer IV, Cabanis Haut - Centre Hospitalier Esquirol, 15 rue du Docteur Marcland, 87025, Limoges Cedex, France | Demiot, Dr Claire                  | 17-Dec-2012                        |
| 2323                | Comité de Protection des Personnes Sud-Ouest et Outre-Mer IV, Comité de Protection des Personnes Sud-Ouest et Outre-Mer IV, Cabanis Haut - Centre Hospitalier Esquirol, 15 rue du Docteur Marcland, 87025, Limoges Cedex, France | Demiot, Dr Claire                  | 17-Dec-2012                        |
| 2324                | Comité de Protection des Personnes Sud-Ouest et Outre-Mer IV, Comité de Protection des Personnes Sud-Ouest et Outre-Mer IV, Cabanis Haut - Centre Hospitalier Esquirol, 15 rue du Docteur Marcland, 87025, Limoges Cedex, France | Demiot, Dr Claire                  | 17-Dec-2012                        |
| 2325                | Comité de Protection des Personnes Sud-Ouest et Outre-Mer IV, Comité de Protection des Personnes Sud-Ouest et Outre-Mer IV, Cabanis Haut - Centre Hospitalier Esquirol, 15 rue du Docteur Marcland, 87025, Limoges Cedex, France | Demiot, Dr Claire                  | 17-Dec-2012                        |

| <b>Country Name</b> | <b>Country IRB/IEC Name and Address</b>                                                                                                                                                                                          | <b>Chairman of Country IRB/IEC</b>   | <b>Country IRB/IEC Actual Date</b> |
|---------------------|----------------------------------------------------------------------------------------------------------------------------------------------------------------------------------------------------------------------------------|--------------------------------------|------------------------------------|
| 2326                | Comité de Protection des Personnes Sud-Ouest et Outre-Mer IV, Comité de Protection des Personnes Sud-Ouest et Outre-Mer IV, Cabanis Haut - Centre Hospitalier Esquirol, 15 rue du Docteur Marcland, 87025, Limoges Cedex, France | Demiot, Dr Claire                    | 17-Dec-2012                        |
| 2327                | Comité de Protection des Personnes Sud-Ouest et Outre-Mer IV, Comité de Protection des Personnes Sud-Ouest et Outre-Mer IV, Cabanis Haut - Centre Hospitalier Esquirol, 15 rue du Docteur Marcland, 87025, Limoges Cedex, France | Demiot, Dr Claire                    | 17-Dec-2012                        |
| Germany<br>2601     | Ethikkommission der Medizinischen Fakultät, der Ludwig-Maximilians-Universität München, Pettenkoferstr. 8a, 80336, München, Germany                                                                                              | Eisenmenger, Prof. Dr. Med. Wolfgang | 26-Nov-2012                        |
| 2602                | Ethikkommission EC bei d.Landesärztekammer Baden-Württemberg, Jahnstraße 40, 70597, Stuttgart, Germany                                                                                                                           | Hook, Dr. Med. Georg                 | 26-Nov-2012                        |
| 2603                | Landesärztekammer Rheinland-Pfalz EC, Deutschhausplatz 3, 55116, Mainz, Germany                                                                                                                                                  | Letzel, Prof. Dr. Med. Stephan       | 26-Nov-2012                        |
| 2605                | Ethikkommission (EC) der Medizinischen Fakultät Heidelberg, Alte Glockengießerei 11/1, 69115, Heidelberg, Germany                                                                                                                | Strowitzki, Prof. Dr. Med. Thomas    | 26-Nov-2012                        |
| 2606                | Geschäftsstelle der Ethikkommission des Landes Berlin, im Landesamt für Gesundheit und Soziales Berlin, Fehrbelliner Platz 1, 10707, Berlin, Germany                                                                             | Garbe, Prof. Dr. Edeltraut           | 26-Nov-2012                        |
| 2609                | Ethikkommission der J.W.Goethe-Universität, Frankfurt am Main, Haus 1, Theodor-Stern-Kai 7, 60590, Frankfurt, Germany                                                                                                            | Harder, Professor S                  | 26-Nov-2012                        |
| 2610                | EC Ethik-Kommission der Ärztekammer Hamburg, Weidestrasse 122b, 22083, Hamburg, Germany                                                                                                                                          | Schrum, Dr. Med. Silke               | 26-Nov-2012                        |
| 2611                | EC Ethik-Kommission (EC) der Bayerischen Landesärztekammer, Mühlbauerstraße 16, 81677, München, Germany                                                                                                                          | Hasford, Prof. Dr. Jorg              | 26-Nov-2012                        |
| 2612                | EC Ethikkommission bei der Sächsischen Landesärztekammer, Schützenhöhe 16-18 01099, Dresden, Germany                                                                                                                             | Haupt, Prof. Rolf                    | 26-Nov-2012                        |

| <b>Country Name</b> | <b>Country IRB/IEC Name and Address</b>                                                                                                                       | <b>Chairman of Country IRB/IEC</b>      | <b>Country IRB/IEC Actual Date</b> |
|---------------------|---------------------------------------------------------------------------------------------------------------------------------------------------------------|-----------------------------------------|------------------------------------|
| 2613                | Ethikkommission der Medizinischen Fakultät<br>Leipzig, Haus: Karl-Sudhoff-Institut, Käthe-Kollwitz-Str. 82, 04109, Leipzig, Germany                           | Preiß, Prof. Dr. R.                     | 26-Nov-2012                        |
| 2614                | EC Ethik-Kommission der Ärztekammer<br>Hamburg, Weidestrasse 122b, 22083,<br>Hamburg, Germany                                                                 | Schrum, Dr. Med.<br>Silke               | 29-Nov-2012                        |
| 2615                | Ethik-Kommission des Landes Sachsen-<br>Anhalt, Geschäftsstelle, Kühnauer Straße 70,<br>06846, Dessau-Roßlau, Germany                                         | Eisenmenger, Prof. Dr.<br>Med. Wolfgang | 25-Apr-2013                        |
| 2616                | EC Ethikkommission des Landes Berlin,<br>Landesamt für Gesundheit und Soziales,<br>Fehrbelliner Platz 1, 10707, Berlin, Germany                               | Garbe, Prof. Dr.<br>Edeltraut           | 21-Mar-2013                        |
| 2617                | Ethik-Kommission der Medizinischen Fakultät<br>der, Friedrich-Alexander-Universität Erlangen-<br>Nürnberg, Krankenhausstraße 12, 91054,<br>Erlangen, Germany  | Betz, Prof. Dr. Peter                   | 11-Jun-2013                        |
| 2618                | EC Ethikkommission bei der Sachsischen<br>Landesärztekammer, Schützenhöhe 16-18,<br>01099, Dresden, Germany                                                   | Haupt, Prof. Rolf                       | 26-Nov-2012                        |
| 2619                | EC Ethik-Kommission der Ärztekammer<br>Hamburg, Weidestrasse 122b, 22083,<br>Hamburg, Germany                                                                 | Schrum, Dr. Med.<br>Silke               | 26-Nov-2012                        |
| 2620                | Geschäftsstelle der Ethikkommission des<br>Landes Berlin, im Landesamt für Gesundheit<br>und Soziales Berlin, Fehrbelliner Platz 1,<br>10707, Berlin, Germany | Garbe, Prof. Dr.<br>Edeltraut           | 26-Nov-2012                        |
| 2621                | EC Ethikkommission bei der Sachsischen<br>Landesärztekammer, Schützenhöhe 16-18,<br>01099, Dresden, Germany                                                   | Haupt, Prof. Rolf                       | 26-Nov-2012                        |
| 2622                | EC Ethikkommission bei der Sachsischen<br>Landesärztekammer, Schützenhöhe 16-18,<br>01099, Dresden, Germany                                                   | Haupt, Prof. Rolf                       | 26-Nov-2012                        |
| 2623                | EthikKommission (EC) der Ärztekammer<br>Nordrhein, Tersteegenstraße 9, 40474,<br>Düsseldorf, Germany                                                          | Racke, Prof. Dr. Med.<br>Kurt           | 26-Nov-2012                        |
| 2624                | Ethikkommission der Medizinischen Fakultät<br>der TU Dresden, Fetscherstrase 74, 01307,<br>Dresden, Germany                                                   | Kirch, Prof. Dr. Med.<br>W              | 26-Nov-2012                        |

| <b>Country Name</b> | <b>Country IRB/IEC Name and Address</b>                                                                                                                      | <b>Chairman of Country IRB/IEC</b> | <b>Country IRB/IEC Actual Date</b> |
|---------------------|--------------------------------------------------------------------------------------------------------------------------------------------------------------|------------------------------------|------------------------------------|
| 2625                | Geschäftsstelle der Ethikkommission des Landes Berlin, im Landesamt für Gesundheit und Soziales Berlin, Fehrbelliner Platz 1, 10707, Berlin, Germany         | Garbe, Prof. Dr. Edeltraut         | 26-Nov-2012                        |
| 2626                | EC Ethik-Kommission der Ärztekammer Hamburg, Weidestrasse 122b, 22083, Hamburg, Germany                                                                      | Schrump, Dr. Med. Silke            | 26-Nov-2012                        |
| 2628                | Ethik-Kommission der Medizinischen Fakultät, und am Universitätsklinikum Tübingen, Gartenstraße 47, 72074, Tübingen, Germany                                 | Luft, Prof. Dr. Med. Dieter        | 26-Nov-2012                        |
| 2629                | EC Ethik-Kommission (EC) der Bayerischen Landesärztekammer, Mühlbauerstraße 16, 81677, München, Germany                                                      | Hasford, Prof. Dr. Jorg            | 03-Jul-2013                        |
| Germany             | Landesärztekammer Rheinland-Pfalz EC, Deutschhausplatz 3, 55116, Mainz, Germany                                                                              | Letzel, Prof. Dr. Med. Stephan     | 02-Jul-2013                        |
| Hungary<br>3301     | Ethics Committee of Hungary - Central, Egészségügyi Tudományos Tanács, Klinikai Farmakológiai Etikai Bizottsága, Arany János u. 6-8, 1051, Budapest, Hungary | Fürst, Dr Zsuzsanna                | 29-Jan-2013                        |
| 3302                | Ethics Committee of Hungary - Central, Egészségügyi Tudományos Tanács, Klinikai Farmakológiai Etikai Bizottsága, Arany János u. 6-8, 1051, Budapest, Hungary | Fürst, Dr Zsuzsanna                | 29-Jan-2013                        |
| 3303                | Ethics Committee of Hungary - Central, Egészségügyi Tudományos Tanács, Klinikai Farmakológiai Etikai Bizottsága, Arany János u. 6-8, 1051, Budapest, Hungary | Fürst, Dr Zsuzsanna                | 29-Jan-2013                        |
| 3304                | Ethics Committee of Hungary - Central, Egészségügyi Tudományos Tanács, Klinikai Farmakológiai Etikai Bizottsága, Arany János u. 6-8, 1051, Budapest, Hungary | Fürst, Dr Zsuzsanna                | 29-Jan-2013                        |
| 3305                | Ethics Committee of Hungary - Central, Egészségügyi Tudományos Tanács, Klinikai Farmakológiai Etikai Bizottsága, Arany János u. 6-8, 1051, Budapest, Hungary | Fürst, Dr Zsuzsanna                | 29-Jan-2013                        |
| 3306                | Ethics Committee of Hungary - Central, Egészségügyi Tudományos Tanács, Klinikai Farmakológiai Etikai Bizottsága, Arany János u. 6-8, 1051, Budapest, Hungary | Fürst, Dr Zsuzsanna                | 29-Jan-2013                        |

| <b>Country Name</b> | <b>Country IRB/IEC Name and Address</b>                                                                                                                               | <b>Chairman of Country IRB/IEC</b> | <b>Country IRB/IEC Actual Date</b> |
|---------------------|-----------------------------------------------------------------------------------------------------------------------------------------------------------------------|------------------------------------|------------------------------------|
| 3307                | Ethics Committee of Hungary - Central,<br>Egészségügyi Tudományos Tanács, Klinikai<br>Farmakológiai Etikai Bizottsága, Arany János<br>u. 6-8, 1051, Budapest, Hungary | Fürst, Dr Zsuzsanna                | 29-Jan-2013                        |
| 3308                | Ethics Committee of Hungary - Central,<br>Egészségügyi Tudományos Tanács, Klinikai<br>Farmakológiai Etikai Bizottsága, Arany János<br>u. 6-8, 1051, Budapest, Hungary | Fürst, Dr Zsuzsanna                | 29-Jan-2013                        |
| 3309                | Ethics Committee of Hungary - Central,<br>Egészségügyi Tudományos Tanács, Klinikai<br>Farmakológiai Etikai Bizottsága, Arany János<br>u. 6-8, 1051, Budapest, Hungary | Fürst, Dr Zsuzsanna                | 29-Jan-2013                        |
| 3310                | Ethics Committee of Hungary - Central,<br>Egészségügyi Tudományos Tanács, Klinikai<br>Farmakológiai Etikai Bizottsága, Arany János<br>u. 6-8, 1051, Budapest, Hungary | Fürst, Dr Zsuzsanna                | 29-Jan-2013                        |
| 3311                | Ethics Committee of Hungary - Central,<br>Egészségügyi Tudományos Tanács, Klinikai<br>Farmakológiai Etikai Bizottsága, Arany János<br>u. 6-8, 1051, Budapest, Hungary | Fürst, Dr Zsuzsanna                | 29-Jan-2013                        |
| 3312                | Ethics Committee of Hungary - Central,<br>Egészségügyi Tudományos Tanács, Klinikai<br>Farmakológiai Etikai Bizottsága, Arany János<br>u. 6-8, 1051, Budapest, Hungary | Fürst, Dr Zsuzsanna                | 29-Jan-2013                        |
| 3313                | Ethics Committee of Hungary - Central,<br>Egészségügyi Tudományos Tanács, Klinikai<br>Farmakológiai Etikai Bizottsága, Arany János<br>u. 6-8, 1051, Budapest, Hungary | Fürst, Dr Zsuzsanna                | 29-Jan-2013                        |
| 3314                | Ethics Committee of Hungary - Central,<br>Egészségügyi Tudományos Tanács, Klinikai<br>Farmakológiai Etikai Bizottsága, Arany János<br>u. 6-8, 1051, Budapest, Hungary | Fürst, Dr Zsuzsanna                | 29-Jan-2013                        |
| 3315                | Ethics Committee of Hungary - Central,<br>Egészségügyi Tudományos Tanács, Klinikai<br>Farmakológiai Etikai Bizottsága, Arany János<br>u. 6-8, 1051, Budapest, Hungary | Fürst, Dr Zsuzsanna                | 29-Jan-2013                        |
| 3316                | Ethics Committee of Hungary - Central,<br>Egészségügyi Tudományos Tanács, Klinikai<br>Farmakológiai Etikai Bizottsága, Arany János<br>u. 6-8, 1051, Budapest, Hungary | Fürst, Dr Zsuzsanna                | 29-Jan-2013                        |

| <b>Country Name</b> | <b>Country IRB/IEC Name and Address</b>                                                                                                                      | <b>Chairman of Country IRB/IEC</b> | <b>Country IRB/IEC Actual Date</b> |
|---------------------|--------------------------------------------------------------------------------------------------------------------------------------------------------------|------------------------------------|------------------------------------|
| 3317                | Ethics Committee of Hungary - Central, Egészségügyi Tudományos Tanács, Klinikai Farmakológiai Etikai Bizottsága, Arany János u. 6-8, 1051, Budapest, Hungary | Fürst, Dr Zsuzsanna                | 18-Jun-2013                        |
| 3318                | Ethics Committee of Hungary - Central, Egészségügyi Tudományos Tanács, Klinikai Farmakológiai Etikai Bizottsága, Arany János u. 6-8, 1051, Budapest, Hungary | Fürst, Dr Zsuzsanna                | 18-Jun-2013                        |
| 3319                | Ethics Committee of Hungary - Central, Egészségügyi Tudományos Tanács, Klinikai Farmakológiai Etikai Bizottsága, Arany János u. 6-8, 1051, Budapest, Hungary | Fürst, Dr Zsuzsanna                | 18-Jun-2013                        |
| 3320                | Ethics Committee of Hungary - Central, Egészségügyi Tudományos Tanács, Klinikai Farmakológiai Etikai Bizottsága, Arany János u. 6-8, 1051, Budapest, Hungary | Fürst, Dr Zsuzsanna                | 18-Jun-2013                        |
| 3321                | Ethics Committee of Hungary - Central, Egészségügyi Tudományos Tanács, Klinikai Farmakológiai Etikai Bizottsága, Arany János u. 6-8, 1051, Budapest, Hungary | Fürst, Dr Zsuzsanna                | 18-Jun-2013                        |
| Italy<br>4101       | COMITATO ETICO ATTIVITA' BIOMEDICHE UNIV.FEDERICO II, VIA PANSINI 5, 80131, NAPOLI, Italy                                                                    | Buccelli, Dr Claudio               | 20-Nov-2012                        |
| 4102                | COMITATO ETICO ATTIVITA' BIOMEDICHE UNIV.FEDERICO II, VIA PANSINI 5, 80131, NAPOLI, Italy                                                                    | Buccelli, Dr Claudio               | 20-Nov-2012                        |
| 4103                | COMITATO ETICO DELLE AZIENDE SANITARIE DELL'UMBRIA, SANITARIE DELL'UMBRIA - CEAS UMBRIA, VIA DELLA RIVOLUZIONE, 16, 06074, CORCIANO, Italy                   | Agnelli, Prof Giancarlo            | 12-Dec-2012                        |
| 4104                | COMITATO ETICO DELL'UNIVERSITA' "SAPIENZA", Viale del Policlinico 155, 00161, Roma, Italy                                                                    | Isidori, Prof Aldo                 | 30-May-2013                        |
| 4105                | COMITATO ETICO REGIONE TOSCANA AREA VASTA NORD OVEST, AREA VASTA NORD OVEST, VIA ROMA 67, 56126, PISA, Italy                                                 | Danesi, Prof Romano                | 22-Nov-2012                        |
| 4106                | Genova-Comitato Etico Liguria, Azienda Ospedaliera Universitaria San Martino, Largo R. Benzi 10, 16132, GENOVA, Italy                                        | Brema, Prof Fulvio                 | 15-Feb-2013                        |

| <b>Country Name</b> | <b>Country IRB/IEC Name and Address</b>                                                                                                                                           | <b>Chairman of Country IRB/IEC</b> | <b>Country IRB/IEC Actual Date</b> |
|---------------------|-----------------------------------------------------------------------------------------------------------------------------------------------------------------------------------|------------------------------------|------------------------------------|
| 4107                | COMITATO ETICO DELL'AZIENDA OSPEDALIERA ANTONIO CARDARELLI, VIA CARDARELLI 9, 80131, NAPOLI, Italy                                                                                | Galgano, Professor Vincenzo        | 23-Apr-2013                        |
| 4108                | COMITATO ETICO CAMPANIA NORD, AZIENDA OSPEDALIERA "S. GIUSEPPE MOSCATI" DI AVELLINO, C/DA AMORETTA-CITTÀ OSPEDALIERA - PAL.UFFICI, 83100, AVELLINO, Italy                         | La Verde, Dr Stefano               | 28-Jan-2013                        |
| 4110                | AZIENDA OSPEDALIERA - UMBERTO I, CE DELL'AZIENDA OSPEDALIERO-UNIVERSITARIA, OSPEDALI RIUNITI UMBERTO I-G.M. LANCISI-G.SALESI DI ANCONA, Via Conca, 71, 60126, Ancona, Italy       | Visani, Dr Giuseppe                | 31-Jan-2013                        |
| 4110                | COMITATO ETICO REGIONALE (C.E.R.) DELLE MARCHE, VIA CONCA 71, 60126, ANCONA, Italy                                                                                                | Visani, Dr Giuseppe                | 31-Jan-2013                        |
| 4111                | CE SECONDA UNIVERSITÀ DEGLI STUDI DI NAPOLI, SUN - AORN OSPE, DEGLI STUDI DI NAPOLI, AOU SUN - AORN OSPEDALI DEI COLLI, VIA S. MARIA DI COSTANTINOPOLI, 104, 80138, NAPOLI, Italy | Berrino, Dr Liberato               | 17-Jan-2013                        |
| 4113                | COMITATO ETICO PER LA SPERIMENTAZIONE CLINICA (CESC) DELLA P, (CESC) DELLE PROVINCIE DI TREVISO E BELLUNO, VIA SANT'AMBROGIO DI FIERA,37, 31011, TREVISO, Italy                   | Costantini, Dr Ornella             | 27-May-2013                        |
| 4114                | Comitato Etico DELL' A.USL di PIACENZA, COMITATO ETICO DELL' A.USL DI PIACENZA, VIA GIUSEPPE TAVERNA N.49, 29121, PIACENZA, Italy                                                 | Damonti, Dr Enrico                 | 14-Dec-2012                        |
| 4115                | COMITATO ETICO PROVINCIA, 'Azienda Ospedaliera Arcispedale Santa Maria Nuova, Viale Risorgimento 57, 42123, REGGIO EMILIA, Italy                                                  | Magrini, Dr Nicola                 | 10-Dec-2012                        |

| <b>Country Name</b> | <b>Country IRB/IEC Name and Address</b>                                                                                                                                                                                   | <b>Chairman of Country IRB/IEC</b> | <b>Country IRB/IEC Actual Date</b> |
|---------------------|---------------------------------------------------------------------------------------------------------------------------------------------------------------------------------------------------------------------------|------------------------------------|------------------------------------|
| 4116                | CE-IRCCS -IEO-CARDIOLOGICO<br>MONZINO, ISTITUTO EUROPEO DI<br>ONCOLOGIA, CENTRO CARDIOLOGICO<br>MONZINO, VIA RIPAMONTI 435, 20141,<br>MILANO, Italy                                                                       | Nonis, Dr Atanasio                 | 29-Jan-2013                        |
| 4117                | COMITATO ETICO MILANO AREA C<br>PIAZZA OSPEDALE MAGGIORE 3, 20162,<br>MILANO, Italy                                                                                                                                       | Cesana, Prof Bruno                 | 14-Dec-2012                        |
| 4118                | Comitato Etico Catania 1, VIA S. SOFIA 78,<br>95123, CATANIA, Italy                                                                                                                                                       | Drago, Prof Filippo                | 18-Dec-2012                        |
| 4119                | Comitato Etico Azienda Sanitaria Provinciale<br>di Ragusa, Piazza Igea, 1, 97100, RAGUSA,<br>Italy                                                                                                                        | Drago, Prof Filippo                | 14-Dec-2012                        |
| 4120                | (EC) COMITATO BIOETICO DELL'AZ.<br>OSPEDALIERA CANNIZZARO, VIA<br>MESSINA 82, 95126, CATANIA, Italy                                                                                                                       | Drago, Prof Filippo                | 03-Dec-2012                        |
| 4121                | COMITATO ETICO ASL 1 SASSARI, VIA<br>MONTE GRAPPA 82, 07100, SASSARI, Italy                                                                                                                                               | Zedda, Dr Maria                    | 14-Dec-2012                        |
| 4123                | COMITATO ETICO AZIENDA SANITARIA<br>PROVINCIALE DI PALERMO, VIA<br>GIACOMO CUSMANO 24, 90141,<br>PALERMO, Italy                                                                                                           | Leone, Dr Salvatore                | 19-Dec-2012                        |
| 4124                | COMITATO ETICO REGIONE TOSCANA<br>AREA VASTA SUD EST, AREA VASTA<br>SUD EST, Viale Bracci 16, 53100, SIENA,<br>Italy                                                                                                      | Martini, Prof Remo                 | 23-Nov-2012                        |
| 4126                | Comitato Etico per la Sperimentazione<br>dell'Azienda Ospedalie, Comitato Etico per la<br>Sperimentazione Clinica (CESC) della<br>Provincia di Padova, Ospedaliera di Padova,<br>Via Giustiniani, 1, 35128, Padova, Italy | Frigo, Dr Anna                     | 14-Jan-2013                        |
| 4128                | CE Provincie Chieti Pescara, Comitato Etico<br>Provincie Chieti e Pescara, Via Martiri<br>Lancianesi 17/19, 66013, CHIETI, Italy                                                                                          | Davì, Prof Giovanni                | 30-Jul-2013                        |
| 4129                | DSM ASL LE1, C.E. DELL'ASL LE/1 DI<br>LECCE, VIA MIGLIETTA, 5, 73100, LECCE,<br>Italy                                                                                                                                     | Conte, Prof Diana                  | 14-May-2013                        |
| 4130                | COMITATO ETICO ATTIVITA'<br>BIOMEDICHE UNIV.FEDERICO II, VIA<br>PANSINI 5, 80131, NAPOLI, Italy                                                                                                                           | Buccelli, Dr Claudio               | 10-Jul-2013                        |

| <b>Country Name</b> | <b>Country IRB/IEC Name and Address</b>                                                                                                                                                            | <b>Chairman of Country IRB/IEC</b> | <b>Country IRB/IEC Actual Date</b> |
|---------------------|----------------------------------------------------------------------------------------------------------------------------------------------------------------------------------------------------|------------------------------------|------------------------------------|
| 4131                | Comitato Etico IRCCS Istituto Tumori Giovanni Paolo II, Tumori Giovanni Paolo II di Bari presso la Fondazione Casa Sollievo della Sofferenza, VIALE CAPPUCCINI, 71013, SAN GIOVANNI ROTONDO, Italy | Sgreccia, Dr Elio                  | 25-Jun-2013                        |
| Japan<br>4301       | IRB of Southern Tohoku General Hospital, IRB, 7-115, Yatsuyamada, 963-8563, Koriyama-shi, Japan                                                                                                    | Kayama, Mr. Satoru                 | 24-Jan-2013                        |
| 4302                | Nihon University Hospital's Joint Institutional Review Board, IRB, 30-1 Oyaguchikami-cho, 173-8610, Itabashi-ku, Japan                                                                             | Hashimoto, Dr. Osamu               | 25-Jan-2013                        |
| 4303                | Tokusyukai Group Institutional Review Board, IRB, 1-8-7 Koji-machi, 102-0083, Chiyoda-ku, Japan                                                                                                    | Ogawa, Mr. Makoto                  | 15-Jan-2013                        |
| 4304                | IRB of Human Rights and Ethics for Clinical Studies, IRB, 13-2, Ichiban-cho, 102-0082, Chiyoda-ku, Japan                                                                                           | Basugi, Dr. Norihiko               | 28-Dec-2012                        |
| 4305                | Tokusyukai Group Institutional Review Board, IRB, 1-8-7 Koji-machi, 102-0083, Chiyoda-ku, Japan                                                                                                    | Ogawa, Mr. Makoto                  | 11-Jan-2013                        |
| 4306                | Toyonaka Municipal Hospital, IRB, 4-14-1 Shibahara-cho, 560-8565, Toyonaka-shi, Japan                                                                                                              | Dono, Mr. Keizo                    | 08-Jan-2013                        |
| 4307                | Kobe Rosai Hospital, IRB, 4-1-23 Kagoikedori, Chuo-ku, 651-0053, Kobe-shi, Japan                                                                                                                   | Washimi, Mr. Masatoshi             | 06-Feb-2013                        |
| 4308                | IRB of Takahashi Clinic Institutional Review Board, IRB, 5-1-31, Iwayakitamachi, Nada-ku, 651-0053, Kobe-shi, Japan                                                                                | Takahashi, Ms. Toshiko             | 16-Jan-2013                        |
| 4309                | Matsuyama Red Cross Hospital, IRB, 1, Bunkyo-Cho, 790-8524, Matsuyama-shi, Japan                                                                                                                   | Kodani, Dr. Nobuyuki               | 11-Jan-2013                        |
| 4310                | Tokusyukai Group Institutional Review Board, IRB, 1-8-7 Koji-machi, 102-0083, Chiyoda-ku, Japan                                                                                                    | Ogawa, Mr. Makoto                  | 11-Jan-2013                        |
| 4311                | Oitaoka Hospital, Keiwakai, Social Medical Corporation, IRB, 3-7-11, Nishitsurusaki, 870-0192, Oita-shi, Japan                                                                                     | Yanagisawa, Mr. Shigetaka          | 20-Dec-2012                        |
| 4312                | National Hospital Organization Central Review Board, IRB, 2-5-21 Higashigaoka, 152-0021, Meguro-ku, Japan                                                                                          | Tsujimura, Mr Nobumasa             | 18-Jan-2013                        |

| <b>Country Name</b> | <b>Country IRB/IEC Name and Address</b>                                                                                                | <b>Chairman of Country IRB/IEC</b> | <b>Country IRB/IEC Actual Date</b> |
|---------------------|----------------------------------------------------------------------------------------------------------------------------------------|------------------------------------|------------------------------------|
| 4313                | IRB of Tokeidai Memorial Hospital<br>Institutional Review Board, IRB, 2-3, Kita 1-jo, Higashi 1, Chuo-ku, 060-0031, Sapporo-shi, Japan | Kimura, Mr. Norihito               | 14-Feb-2013                        |
| 4314                | National Hospital Organization Central Review Board, IRB, 2-5-21 Higashigaoka, 152-0021, Meguro-ku, Japan                              | Tsujimura, Mr Nobumasa             | 18-Jan-2013                        |
| 4315                | Sapporo-Kosei General Hospital, IRB, 8-5 Kita 3 jo Higashi, Chuo-ku, 060-0033, Sapporo-shi, Japan                                      | Karino, Dr. Yoshiyasu              | 17-Jan-2013                        |
| 4316                | Utsukushigaoka Hospital Institutional Review Board, IRB, 61-1 Shinei, Kiyota-ku, 004-0839, Sapporo-shi, Japan                          | Yano, Ms. Yoko                     | 31-Jan-2013                        |
| 4317                | Central IRB Saiseikai Imperial Gift Foundation, Inc.Mita Kokusai Bldg.21F, 1-4-28 Mita, 108-0073, Minato-ku, Japan                     | Matsubara, Mr. Satoru              | 01-Feb-2013                        |
| 4318                | IRB of Human Rights and Ethics for Clinical Studies, IRB, 13-2, Ichiban-cho, 102-0082, Chiyoda-ku, Japan                               | Basugi, Dr. Norihiko               | 21-Jan-2013                        |
| 4319                | Asahi General Hospital, IRB, 1326, I, 289-2511, Asahi-shi, Japan                                                                       | Watanabe, Dr. Saburo               | 08-Feb-2013                        |
| 4320                | National Hospital Organization Central Review Board, IRB, 2-5-21 Higashigaoka, 152-0021, Meguro-ku, Japan                              | Tsujimura, Mr Nobumasa             | 17-Jan-2013                        |
| 4321                | National Center for Global Health and Medicine, IRB, 1-21-1 Toyama, 162-8655, Shinjuku-ku, Japan                                       | Shimizu, Dr. Toshio                | 18-Jan-2013                        |
| 4321                | Tokusyukai Group Institutional Review Board, IRB, 1-8-7 Koji-machi, 102-0083, Chiyoda-ku, Japan                                        | Shimizu, Dr. Toshio                | 18-Jan-2013                        |
| 4322                | Yokohama City University Hospital, IRB, 3-9, Fukuura, Kanazawa-ku, 236-0004, Yokohama-shi, Japan                                       | Saito, Dr. Tomoyuki                | 20-Feb-2013                        |
| 4323                | Institutional Review Board of Jinbo Orthopedic Surgery, IRB, 5-38-41 Hon-cho, 184-0004, Koganei-shi, Japan                             | Kato, Dr. Takeo                    | 18-Jan-2013                        |
| 4324                | Saiseikai Yokohamashi Nambu Hospital, IRB, 3-2-10 Konandai, Konan-Ku, 234-8503, Yokohama-shi, Japan                                    | Endo, Mr. Tsutomu                  | 25-Feb-2013                        |

| <b>Country Name</b> | <b>Country IRB/IEC Name and Address</b>                                                                             | <b>Chairman of Country IRB/IEC</b> | <b>Country IRB/IEC Actual Date</b> |
|---------------------|---------------------------------------------------------------------------------------------------------------------|------------------------------------|------------------------------------|
| 4325                | Yokosuka General Hospital Uwamachi, IRB, 2-36,Uwamachi, 238-8567, Yokosuka-shi, Japan                               | Miura, Mr. Hirotarō                | 09-Jan-2013                        |
| 4326                | Japanese Red Cross Shizuoka Hospital, IRB, 8-2 Otemachi, Aoi-Ku, 420-0853, Shizuoka-shi, Japan                      | Yanaoka, Mr. Masanori              | 04-Mar-2013                        |
| 4327                | Mie University Hospital, IRB, 2-174,Edobashi, 514-8507, Tsu-shi, Japan                                              | Sudo, Mr. Akihiro                  | 16-Jan-2013                        |
| 4328                | Rakuwakai Otowa Hospital, IRB, 2,Otowachinji-cho, Yamashina-ku, 607-8062, Kyoto-shi, Japan                          | Kanaji, Mr. Kenji                  | 14-Feb-2013                        |
| 4329                | Tokusyukai Group Institutional Review Board, IRB, 1-8-7 Koji-machi, 102-0083, Chiyoda-ku, Japan                     | Ogawa, Mr. Makoto                  | 11-Jan-2013                        |
| 4330                | IRB of Human Rights and Ethics for Clinical Studies, IRB, 13-2, Ichiban-cho, 102-0082, Chiyoda-ku, Japan            | Basugi, Dr. Norihiko               | 26-Dec-2012                        |
| 4331                | National Hospital Organization Central Review Board, IRB, 2-5-21 Higashigaoka, 152-0021, Meguro-ku, Japan           | Tsujimura, Mr Nobumasa             | 18-Jan-2013                        |
| 4332                | Taijukai Foundation Kaisei General Hospital, IRB, 3-5-28 Muromachi, 762-0007, Sakaide-shi, Japan                    | Akiyama, Dr. Kinya                 | 10-Jan-2013                        |
| 4333                | Central IRB Saiseikai Imperial Gift Foundation, Inc, Mita Kokusai Bldg.21F, 1-4-28 Mita, 108-0073, Minato-ku, Japan | Matsubara, Mr. Satoru              | 30-Jan-2013                        |
| 4334                | Central IRB Saiseikai Imperial Gift Foundation, Inc, Mita Kokusai Bldg.21F, 1-4-28 Mita, 108-0073, Minato-ku, Japan | Matsubara, Mr. Satoru              | 25-Jan-2013                        |
| 4335                | Iryohojin Shadan Sugiura Clinic Institutional Review Board, 4-4-16-301, Hon-cho, 332-0012, kawaguchi-shi, Japan     | Hashimoto, Dr. Takao               | 18-Jan-2013                        |
| 4336                | Central IRB Saiseikai Imperial Gift Foundation, Inc, Mita Kokusai Bldg.21F, 1-4-28 Mita, 108-0073, Minato-ku, Japan | Matsubara, Mr. Satoru              | 01-Feb-2013                        |
| 4337                | Kumamoto Rousai Hospital, IRB, 1670, Takeharamachi, 866-8633, Yatsushiro-shi, Japan                                 | Ito, Dr. Kiyotaka                  | 17-Jan-2013                        |

| <b>Country Name</b> | <b>Country IRB/IEC Name and Address</b>                                                                                                                                                   | <b>Chairman of Country IRB/IEC</b> | <b>Country IRB/IEC Actual Date</b> |
|---------------------|-------------------------------------------------------------------------------------------------------------------------------------------------------------------------------------------|------------------------------------|------------------------------------|
| 4338                | Tokusyukai Group Institutional Review Board,<br>IRB, 1-8-7 Koji-machi, 102-0083, Chiyoda-ku,<br>Japan                                                                                     | Ogawa, Mr. Makoto                  | 22-Nov-2013                        |
| Mexico<br>4901      | Comité Bioético para la Investigación Clínica<br>S.C, Calle Puebla N°422 Int. 4 Col. Roma,<br>06700, Mexico City, Mexico                                                                  | Ovadia Savariego,<br>Celia         | 30-Jul-2012                        |
| 4902                | Comité Bioético para la Investigación Clínica<br>S.C, Calle Puebla N°422 Int. 4 Col. Roma,<br>06700, Mexico City, Mexico                                                                  | Contreras García, Dr.<br>Roberto   | 18-Sep-2012                        |
| 4903                | Comité Bioético para la Investigación Clínica<br>S.C. Calle Puebla N°422 Int. 4 Col. Roma,<br>06700, Mexico City, Mexico                                                                  | Ovadia Savariego,<br>Celia         | 14-Sep-2012                        |
| 4904                | Comité Bioético para la Investigación Clínica<br>S.C, Calle Puebla N°422 Int. 4 Col. Roma,<br>06700, Mexico City, Mexico                                                                  | Ovadia Savariego,<br>Celia         | 31-Jul-2012                        |
| 4905                | Comité Bioético para la Investigación Clínica<br>S.C, Calle Puebla N°422 Int. 4 Col. Roma,<br>06700, Mexico City, Mexico                                                                  | Ovadia Savariego,<br>Celia         | 14-Sep-2012                        |
| 4906                | Instituto del corazon de Queretaro,<br>Prolongación constituyentes No. 218, Col. El<br>Jacal, Santiago de Queretaro, Mexico                                                               | Rangel, Miguel                     | 25-Sep-2012                        |
| 4907                | Comité Bioético para la Investigación Clínica<br>S.C, Calle Puebla N°422 Int. 4 Col. Roma,<br>06700, Mexico City, Mexico                                                                  | Ovadia Savariego,<br>Celia         | 27-Sep-2012                        |
| 4909                | Comité Bioético para la Investigación Clínica<br>S.C, Calle Puebla N°422 Int. 4 Col. Roma,<br>06700, Mexico City, Mexico                                                                  | Ovadia Savariego,<br>Celia         | 22-Jun-2013                        |
| 4910                | INSTITUTO NACIONAL DE CIENCIAS<br>MEDICAS Y NUTRICION "DR. SALV,<br>Vasco de Quiroga No. 15, Col. sección XV,<br>Delegacion Tlalpan, 14000, México, Mexico                                | Aguilar Salinas, Dr<br>Carlos      | 10-Jul-2013                        |
| 4911                | EC MEXICO CENTRE FOR CLINICAL<br>RESEARCH SA DE CV, Comite de Etica en<br>Inv, Amores 709 Colonia Del Valle, Distrito<br>Federal, Delegacion Benito Juarez, 03100,<br>Mexico, C.P, Mexico | Ovadia Savariego,<br>Celia         | 09-Jan-2013                        |
| 4912                | EC Cardioliink Clin Trials, Av. Hidalgo No.<br>1813, 64060, Nuevo Leon, Mexico                                                                                                            | Hernández Hernández,<br>Jose       | 20-Nov-2012                        |
| 4913                | Hospital Universitario Jose E. Gonzalez<br>UANL, Av. Gonzalitoz y Francisco I. Madero<br>S/N, Mitras Centro, 64460, Monterrey, Mexico                                                     | Garza Leal, José                   | 20-Dec-2012                        |

| <b>Country Name</b> | <b>Country IRB/IEC Name and Address</b>                                                                                                                             | <b>Chairman of Country IRB/IEC</b> | <b>Country IRB/IEC Actual Date</b> |
|---------------------|---------------------------------------------------------------------------------------------------------------------------------------------------------------------|------------------------------------|------------------------------------|
| 4914                | Hospital Central Dr. Ignacio Morones Prieto, Avenida Venustiano Carranza No. 2395, Colonia Zona Universitaria, 78246, San Luis Potosí, Mexico                       | Alonso Rivera, Carlos              | 29-Jan-2013                        |
| 4915                | Comité Bioético para la Investigación Clínica S.C, Calle Puebla N°422 Int. 4 Col. Roma, 06700, Mexico City, Mexico                                                  | Ovadia Savariego, Celia            | 11-Dec-2012                        |
| 4917                | Comite de Rev Interna y E en Inv de la Soc Med Hosp Ang Culi, Blvd. Alfonso G. Calderón Velarde No. 2193, Pte. Desarrollo Urbano Tres Ríos, 80020, Culiacan, Mexico | Zamudio Lerma, Dr. Jorge           | 30-Jan-2013                        |
| 4918                | Comite de Revisión interna y Etica en Investigación, Blvd Alfonso G. Calderón Velarde No. 2193 Pte, Desarrollo Urbano tres rios, 80020, Culiacan, Mexico            | Zamudio Lerma, Dr. Jorge           | 07-Oct-2013                        |
| Netherlands<br>5001 | Leiden Universitair Medisch Centrum, Medisch Ethische Toetsingscommissie, Postbus 9600, 2300 RC, LEIDEN, Netherlands                                                | Willemze, Prof. Dr. R.             | 14-Dec-2012                        |
| 5002                | Leiden Universitair Medisch Centrum, Medisch Ethische Toetsingscommissie, Postbus 9600, 2300 RC, LEIDEN, Netherlands                                                | Willemze, Prof. Dr. R.             | 29-Jan-2013                        |
| 5003                | Leiden Universitair Medisch Centrum, Medisch Ethische Toetsingscommissie, Postbus 9600, 2300 RC, LEIDEN, Netherlands                                                | Willemze, Prof. Dr. R.             | 15-Feb-2013                        |
| 5004                | Leiden Universitair Medisch Centrum, Medisch Ethische Toetsingscommissie, Postbus 9600, 2300 RC, LEIDEN, Netherlands                                                | Willemze, Prof. Dr. R.             | 21-Dec-2012                        |
| 5005                | Leiden Universitair Medisch Centrum, Medisch Ethische Toetsingscommissie, Postbus 9600, 2300 RC, LEIDEN, Netherlands                                                | Willemze, Prof. Dr. R.             | 22-Apr-2013                        |
| 5006                | Leiden Universitair Medisch Centrum, Medisch Ethische Toetsingscommissie, Postbus 9600, 2300 RC, LEIDEN, Netherlands                                                | Willemze, Prof. Dr. R.             | 22-Jan-2013                        |
| 5007                | Leiden Universitair Medisch Centrum, Medisch Ethische Toetsingscommissie, Postbus 9600, 2300 RC, LEIDEN, Netherlands                                                | Willemze, Prof. Dr. R.             | 17-Dec-2012                        |
| 5008                | Leiden Universitair Medisch Centrum, Medisch Ethische Toetsingscommissie, Postbus 9600, 2300 RC, LEIDEN, Netherlands                                                | Willemze, Prof. Dr. R.             | 16-Jan-2013                        |

| <b>Country Name</b> | <b>Country IRB/IEC Name and Address</b>                                                                                                     | <b>Chairman of Country IRB/IEC</b> | <b>Country IRB/IEC Actual Date</b> |
|---------------------|---------------------------------------------------------------------------------------------------------------------------------------------|------------------------------------|------------------------------------|
| 5009                | Leiden Universitair Medisch Centrum,<br>Medisch Ethische Toetsingscommissie,<br>Postbus 9600, 2300 RC, LEIDEN, Netherlands                  | Willemze, Prof. Dr. R.             | 18-Apr-2013                        |
| 5011                | Leiden Universitair Medisch Centrum,<br>Medisch Ethische Toetsingscommissie,<br>Postbus 9600, 2300 RC, LEIDEN, Netherlands                  | Willemze, Prof. Dr. R.             | 18-Jul-2013                        |
| Philippines<br>5501 | St. Luke's Medical Center Institutional Ethics<br>Review Committee                                                                          | Prospero Ma. C. Tuaño<br>, MD.     | 22-May-2013                        |
| 5502                | EC Philippine Heart Center<br>8/F Medical Arts Building East Av<br>Quezon City Philippines                                                  | Dr. Marcelito L.<br>Durante        | 24-Apr-2013                        |
| 5503                | VRPMC EDSA<br>Mandaluyong City 1000 Philippines                                                                                             | Dr. Martin Dela Rosa               | 23-Oct-2012                        |
| 5504                | Metropolitan Medical Center EC Room 209<br>Center for Neutodiagnostic Services 1357<br>Masangkay Street Sta Cruz Manila 1000<br>Philippines | Dr. Grace delos Santos             | 01-Oct-2012                        |
| 5505                | St. Luke's Medical Center Institutional Ethics<br>Review Committee<br>Quezon city, Philippines                                              | Prospero Ma. C. Tuaño<br>, MD.     | 22-May-2013                        |
| 5506                | SPH Bioethics Committee General Luna,<br>Iloilo 5000 Philippines I                                                                          | Dr. Levy Suyoy                     | 15-Dec-2012                        |
| 5507                | EC West Visayas Memorial MC<br>Iloilo City, Philippines                                                                                     | Dr. Fred P. Guillergan<br>Chairman | 10-Oct-2012                        |
| 5508                | Cebu, Perpetual Succour Hosp<br>SPC Medical Center Ethics Committee<br>Gorordo Av, Cebu City 9000 Philippines                               | Dr. Marsha C.<br>Tolentino         | 26-Sep-2012                        |
| 5509                | The Medical City IRB Ortigas Avenue Pasig<br>1605, Philippines                                                                              | DR. CARLO<br>EMMANUEL<br>SUMPAICO  | 14-Jan-2013                        |
| 5510                | EC De La Salle University Medi Gov.A.<br>Mangubat Drive Dasmariñas City Philippines                                                         | Dr. Madeleine Grace<br>M. Sosa     | 10-Apr-2013                        |
| 5511                | Makati Med, Amoroso Street<br>Legaspi Village Makati NCR Philippines                                                                        | Dr. Saturnino P. Javier            | 22-Aug-2013                        |
| 5512                | EC Daniel Mercado MC<br>#1 Pres. Laurel Highway<br>Tanauan City, Philippines                                                                | DR. ANACLETA P.<br>VALDEZ          | 15-Apr-2013                        |

| <b>Country Name</b> | <b>Country IRB/IEC Name and Address</b>                                                                                        | <b>Chairman of Country IRB/IEC</b> | <b>Country IRB/IEC Actual Date</b> |
|---------------------|--------------------------------------------------------------------------------------------------------------------------------|------------------------------------|------------------------------------|
| 5514                | CDUH<br>Institutional Evaluation and Review<br>Committee Osema Boulevard Cebu City<br>Cebu, Philippines                        | Dr. Enrico Gruet                   | 03-May-2013                        |
| 5516                | St. Luke's Medical Center Institutional Ethics<br>Review Committee Quezon City, Philippines                                    | Prospero Ma. C. Tuañ,<br>MD.       | 22-May-2013                        |
| 5517                | Institutional Ethics Review Board Mary<br>Mediatric Medical Center, J.P Laurel Highway<br>Lipa City, Batangas 4217 Philippines | Dr. Narcisa Sonia C.<br>Comia      | 04-Mar-2013                        |
| Poland<br>5701      | Komisja Bioetyczna przy Akademii Medycznej<br>im. L. Rydygiera, ul. M. Skłodowskiej-Curie 9,<br>85-094, Bydgoszcz, Poland      | Śliwka, Prof. Karol                | 16-Oct-2012                        |
| Poland              | Komisja Bioetyczna przy Akademii Medycznej<br>im. L. Rydygiera, ul. M. Skłodowskiej-Curie 9,<br>85-094, Bydgoszcz, Poland      | Śliwka, Prof. Karol                | 16-Oct-2012                        |
| Poland              | Komisja Bioetyczna przy Akademii Medycznej<br>im. L. Rydygiera, ul. M. Skłodowskiej-Curie 9,<br>85-094, Bydgoszcz, Poland      | Śliwka, Prof. Karol                | 16-Oct-2012                        |
| Poland              | Komisja Bioetyczna przy Akademii Medycznej<br>im. L. Rydygiera, ul. M. Skłodowskiej-Curie 9,<br>85-094, Bydgoszcz, Poland      | Śliwka, Prof. Karol                | 16-Oct-2012                        |
| Poland              | Komisja Bioetyczna przy Akademii Medycznej<br>im. L. Rydygiera, ul. M. Skłodowskiej-Curie 9,<br>85-094, Bydgoszcz, Poland      | Śliwka, Prof. Karol                | 16-Oct-2012                        |
| Poland              | Komisja Bioetyczna przy Akademii Medycznej<br>im. L. Rydygiera, ul. M. Skłodowskiej-Curie 9,<br>85-094, Bydgoszcz, Poland      | Śliwka, Prof. Karol                | 16-Oct-2012                        |
| Poland              | Komisja Bioetyczna przy Akademii Medycznej<br>im. L. Rydygiera, ul. M. Skłodowskiej-Curie 9,<br>85-094, Bydgoszcz, Poland      | Śliwka, Prof. Karol                | 26-Feb-2013                        |
| Poland              | Komisja Bioetyczna przy Akademii Medycznej<br>im. L. Rydygiera, ul. M. Skłodowskiej-Curie 9,<br>85-094, Bydgoszcz, Poland      | Śliwka, Prof. Karol                | 25-Jan-2013                        |
| 5710                | Komisja Bioetyczna przy Akademii Medycznej<br>im. L. Rydygiera, ul. M. Skłodowskiej-Curie 9,<br>85-094, Bydgoszcz, Poland      | Śliwka, Prof. Karol                | 25-Jan-2013                        |
| 5711                | Komisja Bioetyczna przy Akademii Medycznej<br>im. L. Rydygiera, ul. M. Skłodowskiej-Curie 9,<br>85-094, Bydgoszcz, Poland      | Śliwka, Prof. Karol                | 25-Jan-2013                        |
| 5712                | Komisja Bioetyczna przy Akademii Medycznej<br>im. L. Rydygiera, ul. M. Skłodowskiej-Curie 9,<br>85-094, Bydgoszcz, Poland      | Śliwka, Prof. Karol                | 25-Jan-2013                        |

| <b>Country Name</b> | <b>Country IRB/IEC Name and Address</b>                                                                                   | <b>Chairman of Country IRB/IEC</b> | <b>Country IRB/IEC Actual Date</b> |
|---------------------|---------------------------------------------------------------------------------------------------------------------------|------------------------------------|------------------------------------|
| 5713                | Komisja Bioetyczna przy Akademii Medycznej<br>im. L. Rydygiera, ul. M. Skłodowskiej-Curie 9,<br>85-094, Bydgoszcz, Poland | Śliwka, Prof. Karol                | 25-Jan-2013                        |
| 5714                | Komisja Bioetyczna przy Akademii Medycznej<br>im. L. Rydygiera, ul. M. Skłodowskiej-Curie 9,<br>85-094, Bydgoszcz, Poland | Śliwka, Prof. Karol                | 25-Jan-2013                        |
| 5715                | Komisja Bioetyczna przy Akademii Medycznej<br>im. L. Rydygiera, ul. M. Skłodowskiej-Curie 9,<br>85-094, Bydgoszcz, Poland | Śliwka, Prof. Karol                | 26-Feb-2013                        |
| 5716                | Komisja Bioetyczna przy Akademii Medycznej<br>im. L. Rydygiera, ul. M. Skłodowskiej-Curie 9,<br>85-094, Bydgoszcz, Poland | Śliwka, Prof. Karol                | 26-Feb-2013                        |
| 5717                | Komisja Bioetyczna przy Akademii Medycznej<br>im. L. Rydygiera, ul. M. Skłodowskiej-Curie 9,<br>85-094, Bydgoszcz, Poland | Śliwka, Prof. Karol                | 26-Feb-2013                        |
| 5718                | Komisja Bioetyczna przy Akademii Medycznej<br>im. L. Rydygiera, ul. M. Skłodowskiej-Curie 9,<br>85-094, Bydgoszcz, Poland | Śliwka, Prof. Karol                | 26-Feb-2013                        |
| 5719                | Komisja Bioetyczna przy Akademii Medycznej<br>im. L. Rydygiera, ul. M. Skłodowskiej-Curie 9,<br>85-094, Bydgoszcz, Poland | Śliwka, Prof. Karol                | 20-Sep-2013                        |
| 5720                | Komisja Bioetyczna przy Akademii Medycznej<br>im. L. Rydygiera, ul. M. Skłodowskiej-Curie 9,<br>85-094, Bydgoszcz, Poland | Śliwka, Prof. Karol                | 03-Sep-2013                        |
| 5721                | Komisja Bioetyczna przy Akademii Medycznej<br>im. L. Rydygiera, ul. M. Skłodowskiej-Curie 9,<br>85-094, Bydgoszcz, Poland | Śliwka, Prof. Karol                | 13-Nov-2013                        |
| 5722                | Komisja Bioetyczna przy Akademii Medycznej<br>im. L. Rydygiera, ul. M. Skłodowskiej-Curie 9,<br>85-094, Bydgoszcz, Poland | Śliwka, Prof. Karol                | 03-Sep-2013                        |
| 5723                | Komisja Bioetyczna przy Akademii Medycznej<br>im. L. Rydygiera, ul. M. Skłodowskiej-Curie 9,<br>85-094, Bydgoszcz, Poland | Śliwka, Prof. Karol                | 03-Sep-2013                        |
| 5725                | Komisja Bioetyczna przy Akademii Medycznej<br>im. L. Rydygiera, ul. M. Skłodowskiej-Curie 9,<br>85-094, Bydgoszcz, Poland | Śliwka, Prof. Karol                | 03-Sep-2013                        |
| 5726                | Komisja Bioetyczna przy Akademii Medycznej<br>im. L. Rydygiera, ul. M. Skłodowskiej-Curie 9,<br>85-094, Bydgoszcz, Poland | Śliwka, Prof. Karol                | 03-Sep-2013                        |

| <b>Country Name</b> | <b>Country IRB/IEC Name and Address</b>                                                                                                                                   | <b>Chairman of Country IRB/IEC</b> | <b>Country IRB/IEC Actual Date</b> |
|---------------------|---------------------------------------------------------------------------------------------------------------------------------------------------------------------------|------------------------------------|------------------------------------|
| 5727                | Komisja Bioetyczna przy Akademii Medycznej im. L. Rydygiera, ul. M. Skłodowskiej-Curie 9, 85-094, Bydgoszcz, Poland                                                       | Śliwka, Prof. Karol                | 03-Sep-2013                        |
| Romania<br>6101     | Comisia Nationala de Bioetica a Medicamentului si a Dispozit, Sos. Stefan cel Mare, nr. 19-21, sector 2, Spitalul Clinic Colentina-Pavilion K, 020125, Bucuresti, Romania | Dumitrescu, Prof Dr Sava           | 31-Jan-2013                        |
| 6102                | Comisia Nationala de Bioetica a Medicamentului si a Dispozit, Sos. Stefan cel Mare, nr. 19-21, sector 2, Spitalul Clinic Colentina-Pavilion K, 020125, Bucuresti, Romania | Dumitrescu, Prof Dr Sava           | 31-Jan-2013                        |
| 6103                | Comisia Nationala de Etica Studiul Clinic al Medicamentului, Str Av Sanatescu nr 48, sector 1, 011478, Bucuresti, Romania                                                 | Dumitrescu, Prof Dr Sava           | 31-Jan-2013                        |
| 6105                | Comisia Nationala de Etica Studiul Clinic al Medicamentului, Str Av Sanatescu nr 48, sector 1, 011478, Bucuresti, Romania                                                 | Dumitrescu, Prof Dr Sava           | 31-Jan-2013                        |
| 6106                | Comisia Nationala de Bioetica a Medicamentului si a Dispozit, Sos. Stefan cel Mare, nr. 19-21, sector 2, Spitalul Clinic Colentina-Pavilion K, 020125, Bucuresti, Romania | Dumitrescu, Prof Dr Sava           | 31-Jan-2013                        |
| 6107                | Comisia Nationala de Etica Studiul Clinic al Medicamentului, Str Av Sanatescu nr 48, sector 1, 011478, Bucuresti, Romania                                                 | Dumitrescu, Prof Dr Sava           | 31-Jan-2013                        |
| 6108                | Comisia Nationala de Etica Studiul Clinic al Medicamentului, Str Av Sanatescu nr 48, sector 1, 011478, Bucuresti, Romania                                                 | Dumitrescu, Prof Dr Sava           | 31-Jan-2013                        |
| 6109                | Comisia Nationala de Bioetica a Medicamentului si a Dispozit, Sos. Stefan cel Mare, nr. 19-21, sector 2, Spitalul Clinic Colentina-Pavilion K, 020125, Bucuresti, Romania | Dumitrescu, Prof Dr Sava           | 31-Jan-2013                        |
| 6110                | Comisia Nationala de Etica Studiul Clinic al Medicamentului, Str Av Sanatescu nr 48, sector 1, 011478, Bucuresti, Romania                                                 | Dumitrescu, Prof Dr Sava           | 31-Jan-2013                        |
| 6111                | Comisia Nationala de Etica Studiul Clinic al Medicamentului, Str Av Sanatescu nr 48, sector 1, 011478, Bucuresti, Romania                                                 | Dumitrescu, Prof Dr Sava           | 31-Jan-2013                        |

| <b>Country Name</b> | <b>Country IRB/IEC Name and Address</b>                                                                                                                                   | <b>Chairman of Country IRB/IEC</b> | <b>Country IRB/IEC Actual Date</b> |
|---------------------|---------------------------------------------------------------------------------------------------------------------------------------------------------------------------|------------------------------------|------------------------------------|
| 6112                | Comisia Nationala de Etica Studiul Clinic al Medicamentului, Str Av Sanatescu nr 48, sector 1, 011478, Bucuresti, Romania                                                 | Dumitrescu, Prof Dr Sava           | 31-Jan-2013                        |
| 6113                | Comisia Nationala de Bioetica a Medicamentului si a Dispozit, Sos. Stefan cel Mare, nr. 19-21, sector 2, Spitalul Clinic Colentina-Pavilion K, 020125, Bucuresti, Romania | Dumitrescu, Prof Dr Sava           | 31-Jan-2013                        |
| 6114                | Comisia Nationala de Etica Studiul Clinic al Medicamentului, Str Av Sanatescu nr 48, sector 1, 011478, Bucuresti, Romania                                                 | Dumitrescu, Prof Dr Sava           | 31-Jan-2013                        |
| 6115                | Comisia Nationala de Etica Studiul Clinic al Medicamentului, Str Av Sanatescu nr 48, sector 1, 011478, Bucuresti, Romania                                                 | Dumitrescu, Prof Dr Sava           | 31-Jan-2013                        |
| 6116                | Comisia Nationala de Bioetica a Medicamentului si a Dispozit, Sos. Stefan cel Mare, nr. 19-21, sector 2, Spitalul Clinic Colentina-Pavilion K, 020125, Bucuresti, Romania | Dumitrescu, Prof Dr Sava           | 31-Jan-2013                        |
| 6117                | Comisia Nationala de Etica Studiul Clinic al Medicamentului, Str Av Sanatescu nr 48, sector 1, 011478, Bucuresti, Romania                                                 | Dumitrescu, Prof Dr Sava           | 17-Apr-2013                        |
| 6118                | Comisia Nationala de Bioetica a Medicamentului si a Dispozit, Sos. Stefan cel Mare, nr. 19-21, sector 2, Spitalul Clinic Colentina-Pavilion K, 020125, Bucuresti, Romania | Dumitrescu, Prof Dr Sava           | 17-Apr-2013                        |
| Russia<br>6202      | IEC At St. Petersburg's Pavlov State Medical University, Roentgen str. 10, 197010, Saint-Petersburg, Russian Federation                                                   | Yagmurov, O.D.                     | 26-Feb-2013                        |
| 6203                | IEC At St. Petersburg's Pavlov State Medical University, Roentgen str, 10, 197010, Saint-Petersburg, Russian Federation                                                   | Yagmurov, Orazmurad                | 26-Feb-2013                        |
| 6204                | IEC of the North-West Medical Academy n.a. Mechnikov, Kirochnaya str, 41, 191015, Saint Petersburg, Russian Federation                                                    | Sheviakov, Mikhail                 | 06-Mar-2013                        |
| 6205                | IEC City Clinical Hospital № 64, Vavilova str. 61, 117292, Moscow, Russian Federation                                                                                     | Kiyakbaev, Prof Gairat             | 26-Feb-2013                        |
| 6206                | IEC of the CDC 85, Veteranov pr, 89, block 3, Saint Petersburg, Russian Federation                                                                                        | Varga, Ms Yelena                   | 22-Mar-2013                        |

| <b>Country Name</b> | <b>Country IRB/IEC Name and Address</b>                                                                                         | <b>Chairman of Country IRB/IEC</b> | <b>Country IRB/IEC Actual Date</b> |
|---------------------|---------------------------------------------------------------------------------------------------------------------------------|------------------------------------|------------------------------------|
| 6207                | IEC St.Petersburg City Multiservice Hospital #2, 5 Uchebniy per, 194354, Saint-Petersburg, Russian Federation                   | Nesterko, Mr Andrey                | 22-Mar-2013                        |
| 6208                | LEC of Institution of name A.M. Nikiforova, 54, Ptikov str, 19374, Saint- Petersburg, Russian Federation                        | Shantyr, Igor                      | 19-Feb-2013                        |
| 6210                | IEC of the Perm War Veterans Hospital, Podlesnaya str, 6, 614097, Perm, Russian Federation                                      | Odegova, Ms Tamara                 | 19-Mar-2013                        |
| 6211                | Ethics Committee of Ural State Medical Univercity, 3, Repina, 620028, Yekaterinburg, Russian Federation                         | Smolenskaya, Dr Olga               | 15-Feb-2013                        |
| 6213                | Ethics Committee at City Clinical Hospital #4, Ulitsa KIM, 2, 614107, Perm, Russian Federation                                  | Lapin, Oleg                        | 22-Apr-2013                        |
| 6214                | LEC of Gatchina Clinical Hospital, 15-A bld 1, Roschinskaya, 188300, Gatchina, Russian Federation                               | Kuz'Ko, Mr Vadim                   | 19-Feb-2013                        |
| 6215                | LEC of FBGU Saratov Clinical Research Cardiologic Institute, 141, Chernyshevskogo street, 410028, Saratov, Russian Federation   | Furman, Dr. Nikolay                | 19-Feb-2013                        |
| 6216                | IEC of North Ossetian State Medical Academy, 40, Pushkinskaya street, 362019, Vladikavkaz, Russian Federation                   | Tsogoev, Dr A                      | 14-Mar-2013                        |
| 6217                | IEC of Moscow hospital 4, Pavlovskaya Street, 25, 115093, Moscow, Russian Federation                                            | Arutunov, Grigori                  | 15-May-2013                        |
| 6218                | EC of Republican Clinical Hospital #2, 1a, Chehova Str, 420043, Kazan, Russian Federation                                       | Khamidullina, Ms El'Mira           | 19-Feb-2013                        |
| 6219                | IEC at the Interregional Clinical and Diagnostic Center, 2a Karbysheva ul, 420101, Kazan, Russian Federation                    | Ibatullin, Mr Murat                | 21-Mar-2013                        |
| 6220                | IEC St.Petersburg Dzhanelidze Research Institute for Emergen, 3 Budapeshtskaya ul, 192242, Saint-Petersburg, Russian Federation | Voznyuk, Dr. Igor                  | 21-Mar-2013                        |
| 6221                | LEC of regional hospital №3, Prospect Pobedy 287 str, 454021, Chelyabinsk, Russian Federation                                   | Nagornov, Mr Vyacheslav            | 26-Mar-2013                        |
| 6222                | LEC of City Clinical Hospital #11, 6, Dvintsev str, 127018, Moscow, Russian Federation                                          | Naumov, Mr Oleg                    | 08-Apr-2013                        |

| <b>Country Name</b> | <b>Country IRB/IEC Name and Address</b>                                                                                                                                                 | <b>Chairman of Country IRB/IEC</b> | <b>Country IRB/IEC Actual Date</b> |
|---------------------|-----------------------------------------------------------------------------------------------------------------------------------------------------------------------------------------|------------------------------------|------------------------------------|
| 6222                | LEC of City hospital 24, 10, Pistsova st, 127015, Moscow, Russian Federation                                                                                                            | Naumov, Mr Oleg                    | 08-Apr-2013                        |
| 6223                | IEC of the Hospital of the OOO Russian Railroads, Mechnikova str, 27, 195271, Saint Petersburg, Russian Federation                                                                      | Remizov, Doctor Alexander          | 20-Feb-2013                        |
| 6224                | IEC Research Cardiology Institute, Tomsk Scientific Center, 111a Kievskaya ul, 634012, Tomsk, Russian Federation                                                                        | Semke, Galina                      | 20-Feb-2013                        |
| 6226                | IEC Sklifosovsky Research Institute for Emergency Care, 3 Bolshaya Sukharevskaya pl. 129090, Moscow, Russian Federation                                                                 | Tropskaya, Ms Natalia              | 22-Apr-2013                        |
| 6227                | IEC of Nizhnii Novgorod City Hospital #13, Patriotov str, 51, 603018, Nizhnii Novgorod, Russian Federation                                                                              | Kurnikov, Mr Georgij               | 25-Apr-2013                        |
| 6228                | Ethics Committee of the Siberian State Medical University, 2, Moscow tract, 634050, Tomsk, Russian Federation                                                                           | Bukreeva, Ekaterina                | 25-Mar-2013                        |
| 6229                | LEC of City hospital #40, 9, Borisova str, 197706, Sestroretsk, Russian Federation                                                                                                      | Lisovets, Mr Dmitriy               | 06-Sep-2013                        |
| 6230                | IEC Meshalkin Research Instit of Blood Circulation Pathology, 15 Rechkunovskaya ul, 630055, Novosibirsk, Russian Federation                                                             | Lomivorotov, Vladimir              | 31-Oct-2013                        |
| 6231                | Local Ethics Committee of Rostov State Medical University, Local Ethics Committee of Rostov State Medical University, Nahichevansky lane, 38, 344022, Rostov-on-Don, Russian Federation | Shatokhin, Prof Yuriy              | 22-Aug-2012                        |
| 6232                | LEC of Tver Regional Hospital, 105, St. Petersburg highway, 170036, Tver, Russian Federation                                                                                            | Platonov, Mr Dmitriy               | 15-Aug-2013                        |
| 6233                | LEC of "Perm Clinical Centre of the FMBA", 24, Sovetskaya street, 614000, Perm, Russian Federation                                                                                      | Osokina, Nataliya                  | 18-Sep-2013                        |
| 6234                | LEC of City Hospital №14, 15 A, 22 Partsyezda str, 620039, Ekaterinburg, Russian Federation                                                                                             | Vishneva, Dr. Elena                | 15-Jul-2013                        |
| 6235                | LEC of Cardioclinic, 25, Kuznetsovskaya, 196105, Saint- Petersburg, Russian Federation                                                                                                  | Semenova, Ms Irina                 | 26-Aug-2013                        |

| <b>Country Name</b> | <b>Country IRB/IEC Name and Address</b>                                                                                     | <b>Chairman of Country IRB/IEC</b> | <b>Country IRB/IEC Actual Date</b> |
|---------------------|-----------------------------------------------------------------------------------------------------------------------------|------------------------------------|------------------------------------|
| 6236                | LEC of The first city clinical hospital of E.E. Volosevich, 1, Suvorova str, 163001, Arkhangelsk, Russian Federation        | Tyuleneva, Ms Larisa               | 01-Aug-2013                        |
| Slovakia<br>6705    | Eticka komisia Kosickeho samospravneho kraja, Namestie Maratonu mieru 1, 042 66, Kosice, Slovakia                           | Kucerova, Dr Dagmar                | 04-Feb-2013                        |
| 6705                | Eticka komisia Narodneho ustavu srdcovych chorob, Eticka komisia, NUSCH, Pod Krasnou horkou 1, 833 48, Bratislava, Slovakia | Kucerova, Dr Dagmar                | 04-Feb-2013                        |
| 6706                | Eticka komisia Kosickeho samospravneho kraja, Namestie Maratonu mieru 1, 042 66, Kosice, Slovakia                           | Kucerova, Dr Dagmar                | 04-Feb-2013                        |
| 6706                | Eticka komisia Narodneho ustavu srdcovych chorob, Eticka komisia, NUSCH, Pod Krasnou horkou 1, 833 48, Bratislava, Slovakia | Kucerova, Dr Dagmar                | 04-Feb-2013                        |
| 6708                | Eticka komisia Narodneho ustavu srdcovych chorob, Eticka komisia, NUSCH, Pod Krasnou horkou 1, 833 48, Bratislava, Slovakia | Kucerova, Dr Dagmar                | 04-Feb-2013                        |
| 6709                | Eticka komisia Trnavskeho samospravneho kraja, Starohajska 10, P.O. BOX 128, 917 01, Trnava, Slovakia                       | Kucerova, Dr Dagmar                | 04-Feb-2013                        |
| 6710                | Eticka komisia Trnavskeho samospravneho kraja, Starohajska 10, P.O. BOX 128, 917 01, Trnava, Slovakia                       | Kucerova, Dr Dagmar                | 04-Feb-2013                        |
| 6711                | Eticka komisia Zilinskeho samospravneho kraja, Komenskeho 48, 011 09, Zilina, Slovakia                                      | Kucerova, Dr Dagmar                | 04-Feb-2013                        |
| 6712                | Eticka komisia Zilinskeho samospravneho kraja, Komenskeho 48, 011 09, Zilina, Slovakia                                      | Kucerova, Dr Dagmar                | 04-Feb-2013                        |
| 6713                | Eticka komisia Zilinskeho samospravneho kraja, Komenskeho 48, 011 09, Zilina, Slovakia                                      | Kucerova, Dr Dagmar                | 04-Feb-2013                        |
| 6714                | Eticka komisia pri Presovskom samospravnom kraji, Namestie mieru 2, 080 01, Presov, Slovakia                                | Kucerova, Dr Dagmar                | 04-Feb-2013                        |
| 6715                | Eticka komisia Presovskeho samospravneho kraja_EC, Namestie Mieru 2, 08001, Presov, Slovakia                                | Kucerova, Dr Dagmar                | 04-Feb-2013                        |

| <b>Country Name</b> | <b>Country IRB/IEC Name and Address</b>                                                                                                                              | <b>Chairman of Country IRB/IEC</b> | <b>Country IRB/IEC Actual Date</b> |
|---------------------|----------------------------------------------------------------------------------------------------------------------------------------------------------------------|------------------------------------|------------------------------------|
| 6716                | Eticka komisia Nitrianskeho samospravného kraja, Razušova 2A, 949 01, Nitra, Slovakia                                                                                | Kucerova, Dr Dagmar                | 04-Feb-2013                        |
| 6717                | Eticka komisia Nitrianskeho samospravného kraja, Razušova 2A, 949 01, Nitra, Slovakia                                                                                | Kucerova, Dr Dagmar                | 04-Feb-2013                        |
| 6718                | Eticka komisia Zeleznicne zdravotnictvo Kosice, sro, Masarykova 9, 040 01, Kosice, Slovakia                                                                          | Kucerova, Dr Dagmar                | 04-Feb-2013                        |
| South Korea<br>6001 | Yonsei University Severance Hospital, Institutional Review Board, 50-1 Yonsei-ro, Seodaemun-gu, 03722, Seoul, South Korea                                            | Kim, Prof Seung Min                | 30-Oct-2012                        |
| 6002                | EC Keimyung University Dongsan Medical Center (EC), 56 Dalseong-ro, Jung-gu, 700-712, Daegu, South Korea                                                             | Rhee, Prof Jeong-Ho                | 19-Oct-2012                        |
| 6003                | EC Asan Medical Center (EC), Institutional Review Board, 88 Olympic-ro 43-gil, Songpa-gu, 138-736, Seoul, South Korea                                                | Dr Jong Woo Chung                  | 14-Nov-2012                        |
| 6004                | Chungnam National University Hospital EC, Institutional Review Board, Biomedical Convergence Research center 2F, 266 Munhwa-ro, Jung-gu, 35015, Daejeon, South Korea | Suh, Professor Kwang-Sun           | 03-Jan-2013                        |
| 6005                | Samsung Medical Center EC, 81 Irwon-ro, Gangnam-gu, 06351, Seoul, South Korea                                                                                        | Yu, Dr Bum-Hee                     | 07-Dec-2012                        |
| 6006                | Sejong General Hospital EC, Institutional Review Board, 28 Hohyeon-ro 489beon-gil, Sosa-gu, 14754, Bucheon-si, South Korea                                           | Lee, Ki-Seog                       | 15-Jan-2013                        |
| 6007                | Seoul National University Bundang Hospital (EC), Institutional Review Board, 82 Gumi-Ro 173 Beon-Gil, Bundang-gu, 13620, Seongnam-si, South Korea                    | Kim, Dr. Cheol Ho                  | 18-Feb-2013                        |
| 6008                | Dankook University Hospital, Institutional Review Board, 201 Manghyang-ro, Dongnam-gu, 330-715, Cheonan-si, South Korea                                              | Jeong, Prof You Seok               | 06-Dec-2012                        |
| 6009                | Gachon University Gil Hospital, Institutional Review Board, 21 Namdong-daero 774beon-gil, Namdong-gu, 405-760, Incheon, South Korea                                  | Kim, Prof Jong-Hoon                | 11-Dec-2012                        |
| 6010                | Korea University Guro Hospital, Institutional Review Board, 148 Gurodong-ro, Guro-gu, 08308, Seoul, South Korea                                                      | Baik, Baik-Lin                     | 31-Jan-2013                        |

| <b>Country Name</b> | <b>Country IRB/IEC Name and Address</b>                                                                                                                                                           | <b>Chairman of Country IRB/IEC</b> | <b>Country IRB/IEC Actual Date</b> |
|---------------------|---------------------------------------------------------------------------------------------------------------------------------------------------------------------------------------------------|------------------------------------|------------------------------------|
| 6011                | The Catholic University of Korea, Seoul St. Mary's Hospital, Institutional Review Board, 222 Banpo-daero, Seocho-gu, 06591, Seoul, South Korea                                                    | Kim, Prof Eun Seong                | 30-Sep-2013                        |
| 6012                | SMG - SNU Boramae Medical Center, Institutional Review Board, 20 Boramae-ro 5-gil, Dongjak-gu, 156-707, Seoul, South Korea                                                                        | Kim, Dr Myung-A                    | 25-Sep-2013                        |
| 6013                | KyungHee University Medical Center, Institutional Review Board, 23 Kyungheedaero, Dongdaemun-gu, 02447, Seoul, South Korea                                                                        | Cho, Prof Kyung Sam                | 04-Oct-2013                        |
| 6014                | Pusan National University Hospital (EC), IRB office, 3F, Office Building, 179 Gudeok-ro, Seo-gu, 602-739, Busan, South Korea                                                                      | Cho, Prof Byung Mann               | 05-Nov-2013                        |
| Spain<br>7001       | Ciudad Sanitaria i Universitaria de Bellvitge CEIC, Comité Ético de Investigación Clínica, Feixa Llarga s/n, Secretaría de Docencia e Investigación, 08907, Hospitalet de Llobregat(Barcel, Spain | Esteve Urbano, Mr Francesc         | 08-Nov-2012                        |
| 7002                | Hospital Universitario Germans Trias i Pujol, Comité Ético de Investigación Clínica, Ctra. del Canyet s/n, Edificio Materno-Infantil 3 planta, 08916, Badalona, Spain                             | Farré Albaladejo, Magí             | 08-Nov-2012                        |
| 7003                | EIC Hospital Universitario La Fe, Secretaría CEIC Torre A Planta 7ª, C/ Bulevar Sur, s/n, 46009, Valencia, Spain                                                                                  | Montalar Salcedo, Dr. Joaquín      | 08-Nov-2012                        |
| 7004                | Corporacio Sanitaria Parc Tauli, CEIC, C/ Parc Tauli 1, Edificio Santa Fe, ala izq 2ª planta, Sabadell, 08208, Barcelona, Spain                                                                   | Segui Palmer, Dr.Miguel Ángel      | 08-Nov-2012                        |
| 7005                | Fundación Hospital de Alcorcón, Comité Ético de Investigación Clínica, Budapest 1, Secretaría del Comité Ético de Investigación Clínica, 28922, Alcorcón, Spain                                   | Bonet Serra,Bartolomé              | 08-Nov-2012                        |
| 7006                | EC Hospital Universitario San Cecilio, Comité Ético de Investigación Clínica, Avda. Dr. Oloriz s/n, 18012, Granada, Spain                                                                         | Aguayo Canela, Mr.Mariano          | 08-Nov-2012                        |
| 7009                | CEIC Hospital Universitario La Fe, Secretaría CEIC Torre A Planta 7ª, C/ Bulevar Sur, s/n, 46009, Valencia, Spain                                                                                 | xxxxx                              | 10-Jan-2013                        |

| <b>Country Name</b> | <b>Country IRB/IEC Name and Address</b>                                                                                                                                            | <b>Chairman of Country IRB/IEC</b> | <b>Country IRB/IEC Actual Date</b> |
|---------------------|------------------------------------------------------------------------------------------------------------------------------------------------------------------------------------|------------------------------------|------------------------------------|
| 7010                | Comité Regional de las Islas Baleares EC, Comité Ético de Investigación Clínica, Cecilio Metelo 18, Consellería de Salud, 07003, Palma de Mallorca, Spain                          | Bargay Lleonart, Joan              | 11-Jan-2013                        |
| 7011                | Complejo Hospitalario de Albacete, Comité Ético de Investigación Clínica, Hermanos Falcó 37, 02006, Albacete, Spain                                                                | Salinas Sánchez, Dr. A.J.          | 11-Jan-2013                        |
| 7012                | Hospital General Universitario de Alicante, Comité Ético de Investigación Clínica, Maestro Alonso nº 109, Secretaría del CEIC, 3ª planta, edificio gris, 03010, Alicante, Spain    | Boix Martínez, Mr Vicente          | 11-Jan-2013                        |
| 7013                | Comite Etico de Investigacion Clinica SERGAS, C/ San Lázaro s/n, 15703, Santiago de Compostela, Spain                                                                              | Portela Romero, Mr Manuel          | 11-Jan-2013                        |
| 7014                | Hospital Universitario Vall d'Hebrón IEC, Agencia de Ensayos Clínicos, Edificio Hospital Materno Infantil, planta 13, Passeig de la Vall d'hebron 119-129, 08035, Barcelona, Spain | Gallego Melcon, Soledad            | 11-Jan-2013                        |
| 7015                | Hospital Universitario Germans Trias i Pujol, Comité Ético de Investigación Clínica, Ctra. del Canyet s/n, Edificio Materno-Infantil 3 planta, 08916, Badalona, Spain              | Farré Albaladejo, Magí             | 11-Jan-2013                        |
| 7016                | Fundación Jiménez Díaz, Comité Ético de Investigación Clínica, Avda. Reyes Católicos 2, 2ª, Secretaria de Investigación, 28040, Madrid, Spain                                      | Herrero-Beaumont, Dr. Gabriel      | 09-May-2013                        |
| 7017                | Hospital Universitario de Getafe, Comité Ético de Investigación Clínica, Ctra. Toledo Km 12,500, Unidad de Investigación edificio VIP, 28905, Getafe, Spain                        | Miravalles González, Elena         | 09-May-2013                        |
| 7018                | CEIC Hospital Clínico San Carlos, Comité Ético de Investigación Clínica, Prof Martín Lagos s/n - ciudad universitaria, 4ª planta, Norte (Puerga G), 28040, Madrid, Spain           | García Arenillas, Ms Ala Mar       | 09-May-2013                        |
| 7019                | CEIC Hospital General Universitario de Valencia, Comité Ético de Investigación Clínica, Avda. de Tres Cruces s/n, PABELLON b3 4 PLANTA, 46014, Valencia, Spain                     | Peláez Hernández, Dr. Antonio      | 22-Jul-2013                        |

| <b>Country Name</b> | <b>Country IRB/IEC Name and Address</b>                                                                                                                                                                            | <b>Chairman of Country IRB/IEC</b>        | <b>Country IRB/IEC Actual Date</b> |
|---------------------|--------------------------------------------------------------------------------------------------------------------------------------------------------------------------------------------------------------------|-------------------------------------------|------------------------------------|
| 7019                | Ciudad Sanitaria i Universitaria de Bellvitge CEIC, Comité Ético de Investigación Clínica, Feixa Llarga s/n, Secretaría de Docencia e Investigación, 08907, Hospitalet de Llobregat(Barcel, Spain                  | Peláez Hernández, Dr. Antonio             | 22-Jul-2013                        |
| 7020                | Comité Autonómico de Ensayos Clínicos de Andalucía CAEC, Avda.de la Innovación s/n, Edificio Arena 1, 41020, Sevilla, Spain                                                                                        | Aguayo Canela, Mr. Mariano                | 06-Jun-2013                        |
| 7021                | CEIC del Hospital de la Santa Creu i Sant Pau, C/ Sant Antoni Mª Claret, 167, Edificio HC, planta 1ª- izquierda, Hospital de la Santa Creu i Sant Pau, 08025, Barcelona, Spain                                     | López Pousa, Mr Antonio                   | 06-Jun-2013                        |
| 7022                | Hospital Universitario La Princesa, Comité Ético de Investigación Clínica, Diego de León 62, Servicio de Farmacología Clínica, 28006, Madrid, Spain                                                                | Abad Santos, Francisco                    | 11-Jul-2013                        |
| 7023                | EC Hospital General Universitario Gregorio Marañón, Secretaria Técnica CEIC, Fundación para la Investigación Biomédica, Hospital Gregorio Marañón, Pabellón de Gobierno, C/ Dr. Esquerdo, 46, 28007, Madrid, Spain | Zubeldia Ortuño, Manuel                   | 11-Jul-2013                        |
| 7024                | Comité Ético de Investigación Clínica del Hospital U. La Paz, Hospital Universitario La Paz, Planta 8 Hospital General - Paseo de la Castellana, 261, 28046, Madrid, Spain                                         | Castro, Dr Almudena                       | 11-Jul-2013                        |
| 7025                | EC Comite coord etica investigacion biomedica de Andalucia, Consejería de Salud, Avda. Innovación s/n – Edificio Arena 1, 41020, Sevilla, Spain                                                                    | Aguayo Canela, Mr. Mariano                | 11-Jul-2013                        |
| 7026                | Comité Ético de Investigación Clínica de Asturias, Comité Ético de Investigación Clínica, Celestino Villamil s/n, Edificio Centro de Rehabilitación- 5ª planta, 33006, Oviedo, Spain                               | Alonso, Mr Carlos                         | 11-Jul-2013                        |
| 7027                | HM Univ. Montepincipe, Edificio docente Facultad de Medicina, Av. Montepincipe, 25, 28660, Boadilla del Monte, Spain                                                                                               | Ruiz De Aguilar Díaz Obregón, Mr Santiago | 11-Jul-2013                        |
| 7028                | Hospital de Tarragona Joan XXIII, Comité Ético de Investigación Clínica, Doctor Mallafré Guasch s/n, 43007, Tarragona, Spain                                                                                       | Plana Rodríguez, Mr Jaume                 | 11-Jul-2013                        |

| <b>Country Name</b> | <b>Country IRB/IEC Name and Address</b>                                                                                                                            | <b>Chairman of Country IRB/IEC</b>     | <b>Country IRB/IEC Actual Date</b> |
|---------------------|--------------------------------------------------------------------------------------------------------------------------------------------------------------------|----------------------------------------|------------------------------------|
| 7030                | Hospital Virgen de la Salud, C/ Alicante, s/n 1ª planta - Despacho 4, 45005, Toledo, Spain                                                                         | Gómez Rodríguez, Mr Antonio            | 11-Jul-2013                        |
| 7031                | EC Hospital de Lleida Arnau de Vilanova, Avda. Alcalde Rovira Roure 80, Edificio Central 1ª Planta, Att. Montse Solamilla, 25198, Lérida, Spain                    | Schoembergauer Arnaiz, Joan            | 11-Jul-2013                        |
| Sweden<br>7200      | EC Regionala etikprövningsnämnden i Uppsala, 751 49, Uppsala, Sweden                                                                                               | Kramer, Natalie                        | 10-Oct-2012                        |
| Sweden              | EC Regionala etikprövningsnämnden i Uppsala, 751 49, Uppsala, Sweden                                                                                               | Kramer, Natalie                        | 29-Nov-2012                        |
| Sweden              | EC Regionala etikprövningsnämnden i Uppsala, 751 49, Uppsala, Sweden                                                                                               | Kramer, Natalie                        | 29-Nov-2012                        |
| Sweden              | EC Regionala etikprövningsnämnden i Uppsala, 751 49, Uppsala, Sweden                                                                                               | Kramer, Natalie                        | 29-Nov-2012                        |
| Sweden              | EC Regionala etikprövningsnämnden i Uppsala, 751 49, Uppsala, Sweden                                                                                               | Kramer, Natalie                        | 29-Nov-2012                        |
| Sweden              | EC Regionala etikprövningsnämnden i Uppsala, 751 49, Uppsala, Sweden                                                                                               | Kramer, Natalie                        | 29-Nov-2012                        |
| Sweden              | EC Regionala etikprövningsnämnden i Uppsala, 751 49, Uppsala, Sweden                                                                                               | Kramer, Natalie                        | 29-Nov-2012                        |
| Sweden              | EC Regionala etikprövningsnämnden i Uppsala, 751 49, Uppsala, Sweden                                                                                               | Kramer, Natalie                        | 29-Nov-2012                        |
| Sweden              | EC Regionala etikprövningsnämnden i Uppsala, 751 49, Uppsala, Sweden                                                                                               | Kramer, Natalie                        | 29-Nov-2012                        |
| Sweden              | EC Regionala etikprövningsnämnden i Uppsala, 751 49, Uppsala, Sweden                                                                                               | Kramer, Natalie                        | 29-Nov-2012                        |
| Thailand<br>7501    | IRB Siriraj Hospital, Faculty of Medicine Siriraj Hospital, 6th floor, Adulyadejvikkrom Building, Room no. 611, 2 Prannok Road, 10700, Bangkoknoi, Thailand        | Soongswang, Dr. Jarupim                | 25-Jan-2013                        |
| 7502                | The Khon Kaen University Ethics Committee for Human Research, Khon Kaen University, Room 5317, 3rd floor Wadwichakarn Building, 40002, Khon Kaen, Thailand         | Jeeravipool, Prof Polasak              | 30-Jan-2013                        |
| 7503                | EC Prince of Songkla University, Office of Human Research Ethics Committee, 4th floor Administrative Building, Kanjanawanich Road Hatyai, 90110, Songkla, Thailand | Tangtrakulwanich, Assoc. Prof. Boonsin | 30-Jan-2013                        |

| <b>Country Name</b> | <b>Country IRB/IEC Name and Address</b>                                                                                                                                                                                                                                                                | <b>Chairman of Country IRB/IEC</b> | <b>Country IRB/IEC Actual Date</b> |
|---------------------|--------------------------------------------------------------------------------------------------------------------------------------------------------------------------------------------------------------------------------------------------------------------------------------------------------|------------------------------------|------------------------------------|
| 7504                | Ethical Clearance Committee on Human Rights, Ethical Clearance Committee on Human Rights Related to, Researches Involving Human Subjects, Faculty of Medicine Ramathibodi Hospital, Mahidol University, 3rd floor Research and Welfare Building 270 RamaIV Road, Ratchathewi, 10400, Bangkok, Thailand | Ongphiphadhanakul, Prof. Boonsong  | 17-Apr-2013                        |
| 7505                | Ethical Clearance Committee on Human Rights, Ethical Clearance Committee on Human Rights Related to, Researches Involving Human Subjects, Faculty of Medicine Ramathibodi Hospital, Mahidol University, 3rd floor Research and Welfare Building 270 RamaIV Road, Ratchathewi, 10400, Bangkok, Thailand | Ongphiphadhanakul, Prof. Boonsong  | 20-Mar-2013                        |
| 7506                | Institutional Review Board, Faculty of Medicine, Chulalongkorn University, 1873 Rama 4 Road, 10330, Patumwan, Thailand                                                                                                                                                                                 | Sueblinvong, Dr Tada               | 04-Apr-2013                        |
| Turkey<br>7601      | Istanbul University Cerrahpasa Medical Faculty Ethics Committee, Kocamustafapasa, 34303, Istanbul Turkey                                                                                                                                                                                               | Kasapcopur, Prof. Dr. Ozgur        | 02-Oct-2012                        |
| 7602                | Istanbul University Cerrahpasa Medical Faculty Ethics Committee, Kocamustafapasa, 34303, Istanbul Turkey                                                                                                                                                                                               | Kasapcopur, Prof. Dr. Ozgur        | 02-Oct-2012                        |
| 7603                | Istanbul University Cerrahpasa Medical Faculty Ethics Committee, Kocamustafapasa, 34303, Istanbul Turkey                                                                                                                                                                                               | Kasapcopur, Prof. Dr. Ozgur        | 02-Oct-2012                        |
| 7604                | Istanbul University Cerrahpasa Medical Faculty Ethics Committee, Kocamustafapasa, 34303, Istanbul Turkey                                                                                                                                                                                               | Kasapcopur, Prof. Dr. Ozgur        | 02-Oct-2012                        |
| 7605                | Istanbul University Cerrahpasa Medical Faculty Ethics Committee, Kocamustafapasa, 34303, Istanbul Turkey                                                                                                                                                                                               | Kasapcopur, Prof. Dr. Ozgur        | 02-Oct-2012                        |
| 7606                | Istanbul University Cerrahpasa Medical Faculty Ethics Committee, Kocamustafapasa, 34303, Istanbul Turkey                                                                                                                                                                                               | Kasapcopur, Prof. Dr. Ozgur        | 02-Oct-2012                        |
| 7607                | Istanbul University Cerrahpasa Medical Faculty Ethics Committee, Kocamustafapasa, 34303, Istanbul Turkey                                                                                                                                                                                               | Kasapcopur, Prof. Dr. Ozgur        | 02-Oct-2012                        |

| <b>Country Name</b> | <b>Country IRB/IEC Name and Address</b>                                                                                                                                                                                                  | <b>Chairman of Country IRB/IEC</b> | <b>Country IRB/IEC Actual Date</b> |
|---------------------|------------------------------------------------------------------------------------------------------------------------------------------------------------------------------------------------------------------------------------------|------------------------------------|------------------------------------|
| 7608                | Istanbul University Cerrahpasa Medical Faculty Ethics Committee, Kocamustafapasa, 34303, Istanbul Turkey                                                                                                                                 | Kasapcopur, Prof. Dr. Ozgur        | 02-Oct-2012                        |
| 7609                | Istanbul University Cerrahpasa Medical Faculty Ethics Committee, Kocamustafapasa, 34303, Istanbul Turkey                                                                                                                                 | Kasapcopur, Prof. Dr. Ozgur        | 02-Oct-2012                        |
| 7610                | Istanbul University Cerrahpasa Medical Faculty Ethics Committee, Kocamustafapasa, 34303, Istanbul Turkey                                                                                                                                 | Kasapcopur, Prof. Dr. Ozgur        | 02-Oct-2012                        |
| 7611                | Istanbul University Cerrahpasa Medical Faculty Ethics Committee, Kocamustafapasa, 34303, Istanbul Turkey                                                                                                                                 | Kasapcopur, Prof. Dr. Ozgur        | 02-Oct-2012                        |
| 7612                | Istanbul University Cerrahpasa Medical Faculty Ethics Committee, Kocamustafapasa, 34303, Istanbul Turkey                                                                                                                                 | Kasapcopur, Prof. Dr. Ozgur        | 02-Oct-2012                        |
| Ukraine<br>7701     | LEC of the City Clinical Hospital #1, 121, Kharkivske highway, 02091, Kyiv, Ukraine                                                                                                                                                      | Titomir, Mr Anatoliy               | 27-Feb-2013                        |
| 7702                | SI Departmental Clin Hosp Railway Station Zapor-2, 21a, Chumachenko Str. 69104, Zaporizhzhya, Ukraine                                                                                                                                    | Poplyonkin, Dr Yevgeniy            | 22-Feb-2013                        |
| 7703                | Zaporizza UE City Hospital #7, 9, Lunacharskogo str. 69118, Zaporizhzhya, Ukraine                                                                                                                                                        | Liutyh, Md Yurii                   | 18-Feb-2013                        |
| 7704                | LEC of Zaporizhzhya City Medical Hospital #3, 9, Metalurgov ave. 69032, Zaporizhzhya, Ukraine                                                                                                                                            | Pashkova, Dr Anna                  | 14-Feb-2013                        |
| 7705                | LEC of Kharkiv Municipal Clinical Hospital #8, 266 G, Saltivske shose, 61176, Kharkiv, Ukraine                                                                                                                                           | Orudjeva, Dr Olena V               | 18-Feb-2013                        |
| 7706                | LEC SI L.T. Mala Institute of Therapy Acad. of Med.Science, 2A, L.Maloy ave. 61039, Kharkiv, Ukraine                                                                                                                                     | Fadeenko, Dr. Galyna               | 20-Feb-2013                        |
| 7707                | LEC of Ivano-Frankivsk City Clinical Hospital # 1, 34, Mateika Str. 76014, Ivano-Frankivsk, Ukraine                                                                                                                                      | Choudovska, Dr Liudmyla            | 20-Feb-2013                        |
| 7708                | LEC of Lviv Railway Station "Uzhgorod", Commission on Ethics Questions of State Institution: Uzhhorod Railway Station Clinical Hosp under the State Territorial Economic Assoc: Lviv Railway, 71, Mynaiska Str, 88009, Uzhgorod, Ukraine | Kanchiy, Dr Volodymyr              | 20-Feb-2013                        |

| <b>Country Name</b>    | <b>Country IRB/IEC Name and Address</b>                                                                             | <b>Chairman of Country IRB/IEC</b> | <b>Country IRB/IEC Actual Date</b> |
|------------------------|---------------------------------------------------------------------------------------------------------------------|------------------------------------|------------------------------------|
| 7709                   | Vinnitsa Regional Hospital for disabled veterans, 109A, Pirogova Str. 21005, Vinnitsya, Ukraine                     | Dzhigalyuk, Dr. Viktor             | 19-Feb-2013                        |
| 7710                   | LEC of MI "Odesa Regional Clinical Hospital", 26, Academic Zabolotny Str, Odesa, Ukraine                            | Bayazitov, Dr Mykola               | 21-Feb-2013                        |
| 7711                   | LEC SI L.T. Mala Institute of Therapy Acad. of Med.Science, 2A, L.Maloy ave, 61039, Kharkiv, Ukraine                | Fadeenko, Dr. Galyna               | 22-Feb-2013                        |
| 7712                   | LEC Ivano-Frankivsk central city clinical hospital of MOHU, 114, Mazepy str, 76018, Ivano-Frankivsk, Ukraine        | Zihon, Dr Oleg                     | 18-Feb-2013                        |
| 7713                   | LEC of Institute of surgery and transplantology of UAMS, 30, Geroev Sevastopolya str, 03680, Kyiv, Ukraine          | Kostenko, Dr Andriy                | 29-Jul-2013                        |
| 7715                   | Kyiv Oleksandrivska Clinical Hospital LEC, 39/1, Shovkovychna, 01601, Kyiv, Ukraine                                 | Kurylchyk, Iryna                   | 18-Jun-2013                        |
| 7716                   | SI "Institute of General and Emergency Surgery, 3a, Balakireva lane, 61103, Kharkiv, Ukraine                        | Sushkov, Dr Sergii                 | 25-Feb-2013                        |
| 7717                   | MI Zaporizhzhia Regional Clinical Hospital of ZRC, 10, Orehovskoje Av. 69600, Zaporizza, Ukraine                    | Tyagla, Md Viktoriia               | 18-Jun-2013                        |
| United Kingdom<br>2801 | NRES Committee East Midlands - Leicester, The Old Chapel, Royal Standard Place, NG1 6FS, Nottingham, United Kingdom | Edwards, Dr Carl                   | 03-Dec-2012                        |
| 2802                   | NRES Committee East Midlands - Leicester, The Old Chapel, Royal Standard Place, NG1 6FS, Nottingham, United Kingdom | Edwards, Dr Carl                   | 03-Dec-2012                        |
| 2803                   | NRES Committee East Midlands - Leicester, The Old Chapel, Royal Standard Place, NG1 6FS, Nottingham, United Kingdom | Edwards, Dr Carl                   | 03-Dec-2012                        |
| 2804                   | NRES Committee East Midlands - Leicester, The Old Chapel, Royal Standard Place, NG1 6FS, Nottingham, United Kingdom | Edwards, Dr Carl                   | 03-Dec-2012                        |
| 2805                   | NRES Committee East Midlands - Leicester, The Old Chapel, Royal Standard Place, NG1 6FS, Nottingham, United Kingdom | Edwards, Dr Carl                   | 03-Dec-2012                        |

| <b>Country Name</b>              | <b>Country IRB/IEC Name and Address</b>                                                                              | <b>Chairman of Country IRB/IEC</b> | <b>Country IRB/IEC Actual Date</b> |
|----------------------------------|----------------------------------------------------------------------------------------------------------------------|------------------------------------|------------------------------------|
| 2806                             | NRES Committee East Midlands - Leicester, The Old Chapel, Royal Standard Place, NG1 6FS, Nottingham, United Kingdom  | Edwards, Dr Carl                   | 03-Dec-2012                        |
| 2807                             | NRES Committee East Midlands - Leicester, The Old Chapel, Royal Standard Place, NG1 6FS, Nottingham, United Kingdom  | Edwards, Dr Carl                   | 03-Dec-2012                        |
| 2808                             | NRES Committee East Midlands - Leicester, The Old Chapel, Royal Standard Place, NG1 6FS, Nottingham, United Kingdom  | Edwards, Dr Carl                   | 03-Dec-2012                        |
| 2809                             | NRES Committee East Midlands - Leicester, The Old Chapel, Royal Standard Place, NG1 6FS, Nottingham, United Kingdom  | Edwards, Dr Carl                   | 27-Jun-2013                        |
| 2810                             | NRES Committee East Midlands - Leicester, The Old Chapel, Royal Standard Place, NG1 6FS, Nottingham, United Kingdom  | Edwards, Dr Carl                   | 27-Jun-2013                        |
| 2811                             | NRES Committee East Midlands - Leicester, The Old Chapel, Royal Standard Place, NG1 6FS, Nottingham, United Kingdom  | Edwards, Dr Carl                   | 17-Jul-2013                        |
| 2812                             | NRES Committee East Midlands - Leicester, The Old Chapel, Royal Standard Place, NG1 6FS, Nottingham, United Kingdom  | Edwards, Dr Carl                   | 27-Jun-2013                        |
| United States of America<br>7801 | Copernicus Group IRB, One Triangle Drive, Suite 100, PO Box 110605, 27709, Durham, United States of America          | Veit, Dr Glenn                     | 01-Oct-2012                        |
| 7802                             | Genesis Healthcare System Good Samaritan Hospital, 2951 Maple Ave, 43701, Zanesville, United States of America       | Parekh, Dr Mitesh                  | 12-Oct-2012                        |
| 7805                             | Copernicus Group IRB, One Triangle Drive, Suite 100, PO Box 110605, 27709, Durham, United States of America          | Veit, Dr Glenn                     | 01-Oct-2012                        |
| 7806                             | Copernicus Group IRB, One Triangle Drive, Suite 100, PO Box 110605, 27709, Durham, United States of America          | Veit, Dr Glenn                     | 24-Oct-2012                        |
| 7807                             | Copernicus Group IRB, One Triangle Drive, Suite 100, PO Box 110605, 27709, Durham, United States of America          | Veit, Dr Glenn                     | 07-Nov-2012                        |
| 7808                             | Copernicus Group IRB, One Triangle Drive, Suite 100, Research Triangle Park, 27709, Durham, United States of America | Veit, Dr Glenn                     | 22-Mar-2013                        |

| <b>Country Name</b> | <b>Country IRB/IEC Name and Address</b>                                                                           | <b>Chairman of Country IRB/IEC</b> | <b>Country IRB/IEC Actual Date</b> |
|---------------------|-------------------------------------------------------------------------------------------------------------------|------------------------------------|------------------------------------|
| 7809                | Copernicus Group IRB, One Triangle Drive, Suite 100, PO Box 110605, 27709, Durham, United States of America       | Veit, Dr Glenn                     | 05-Oct-2012                        |
| 7810                | Copernicus Group IRB, One Triangle Drive, Suite 100, PO Box 110605, 27709, Durham, United States of America       | Veit, Dr Glenn                     | 03-Oct-2012                        |
| 7811                | Parkview Health IRB, 3614 New Vision Dr, 46845, Ft Wayne, United States of America                                | Dykhuisen, Dennis                  | 17-Oct-2012                        |
| 7812                | University of Cincinnati Medical Center, 3535 7th Ave, SW, PO Box 12029, 98508, Olympia, United States of America | Schultz, Theodore                  | 19-Apr-2013                        |
| 7813                | Copernicus Group IRB, One Triangle Drive, Suite 100, PO Box 110605, 27709, Durham, United States of America       | Veit, Dr Glenn                     | 09-Nov-2012                        |
| 7814                | Copernicus Group IRB, One Triangle Drive, Suite 100, PO Box 110605, 27709, Durham, United States of America       | Veit, Dr Glenn                     | 24-Oct-2012                        |
| 7815                | Indiana/Ohio Heart, 7910 West Jefferson Blvd, Suite 102, 46804, Fort Wayne, United States of America              | Farnsworth, Dr Kent                | 29-Oct-2012                        |
| 7819                | Copernicus Group IRB, PO Box 110605, 27709, Research Triangle Park, United States of America                      | Veit, Dr Glenn                     | 20-Feb-2013                        |
| 7820                | Copernicus Group IRB, One Triangle Drive, Suite 100, PO Box 110605, 27709, Durham, United States of America       | Veit, Dr Glenn                     | 06-Nov-2012                        |
| 7821                | Copernicus Group IRB, One Triangle Drive, Suite 100, PO Box 110605, 27709, Durham, United States of America       | Veit, Dr Glenn                     | 04-Oct-2012                        |
| 7822                | Copernicus Group IRB, One Triangle Drive, Suite 100, PO Box 110605, 27709, Durham, United States of America       | Veit, Dr Glenn                     | 18-Oct-2012                        |
| 7825                | Johns Hopkins University IRB, 1620 McElderry St, Reed Hall B-130, 21205-1911, Baltimore, United States of America | Carrese, Dr Joseph                 | 28-Jan-2013                        |
| 7826                | Copernicus Group IRB, One Triangle Drive, Suite 100, PO Box 110605, 27709, Durham, United States of America       | Veit, Dr Glenn                     | 31-Oct-2012                        |

| <b>Country Name</b> | <b>Country IRB/IEC Name and Address</b>                                                                                      | <b>Chairman of Country IRB/IEC</b> | <b>Country IRB/IEC Actual Date</b> |
|---------------------|------------------------------------------------------------------------------------------------------------------------------|------------------------------------|------------------------------------|
| 7830                | Chesapeake IRB, 6940 Columbia Gateway Drive, Suite 110, Chesapeake, United States of America                                 | Priest, Troy                       | 13-Nov-2012                        |
| 7831                | Copernicus Group IRB, One Triangle Drive, Suite 100, PO Box 110605, 27709, Durham, United States of America                  | Veit, Dr Glenn                     | 08-Nov-2012                        |
| 7832                | Copernicus Group IRB, One Triangle Drive, Suite 100, PO Box 110605, 27709, Durham, United States of America                  | Veit, Dr Glenn                     | 03-Oct-2012                        |
| 7834                | EC University of Virginia Cardiology, Morton Bldg, Ste. 500, One Morton Dr, 22908, Charlottesville, United States of America | Stevenson, Dr Richard              | 04-Mar-2013                        |
| 7836                | Copernicus Group IRB, One Triangle Drive, Suite 100, PO Box 110605, 27709, Durham, United States of America                  | Veit, Dr Glenn                     | 08-Nov-2012                        |
| 7838                | Human Research Protections Office (HRPO), 800 W Baltimore St, Ste. 100, 21201, Baltimore, United States of America           | Rosenthal, Dr Robert               | 22-Jan-2013                        |
| 7839                | University of South Alabama IRB, 307 North University Blvd, CSAB 138, 36688, Mobile, United States of America                | Green, Dr Kevin                    | 19-Feb-2013                        |
| 7840                | Western Institutional Review Board, 1019 39th Ave SE, Suite 120, 98374, Puyallup, United States of America                   | Schultz, Dr Theodore               | 14-Dec-2012                        |
| 7841                | EC Norton Healthcare, 224 E Broadway, 7th Fl, 40202, Louisville, United States of America                                    | Adkins, Ms Bridget                 | 21-Nov-2012                        |
| 7842                | EC Aultman Hospital, 2600 6th St, SW, 44710, Canton, United States of America                                                | Nelson, Dr Karl                    | 09-Jan-2013                        |
| 7845                | EC Sparks Regional Medical Center, 1001 Towson Ave. 72901, Fort Smith, United States of America                              | Mosley, Dr Carolyn                 | 13-Nov-2012                        |
| 7846                | Copernicus Group IRB, One Triangle Drive, Suite 100, PO Box 110605, 27709, Durham, United States of America                  | Veit, Dr Glenn                     | 18-Oct-2012                        |
| 7853                | Copernicus Group IRB, One Triangle Drive, Suite 100, PO Box 110605, 27709, Durham, United States of America                  | Veit, Dr Glenn                     | 02-Nov-2012                        |
| 7854                | Western IRB, 3535 Seventh Ave SW, PO Box 12029, 98508, Olympia, United States of America                                     | Schultz, Dr Theodore               | 31-May-2013                        |

| <b>Country Name</b> | <b>Country IRB/IEC Name and Address</b>                                                                                    | <b>Chairman of Country IRB/IEC</b> | <b>Country IRB/IEC Actual Date</b> |
|---------------------|----------------------------------------------------------------------------------------------------------------------------|------------------------------------|------------------------------------|
| 7855                | Copernicus Group IRB, One Triangle Drive, Suite 100, PO Box 110605, 27709, Durham, United States of America                | Veit, Dr Glenn                     | 28-Nov-2012                        |
| 7856                | Biomedical Research Alliance of New York IRB, 1981 Marcus Ave, Suite 210, 11042, Lake Success, United States of America    | Waldron, Dr Andrea                 | 10-Dec-2012                        |
| 7857                | Copernicus Group IRB, One Triangle Drive, Suite 100, PO Box 110605, 27709, Durham, United States of America                | Veit, Dr Glenn                     | 03-Oct-2012                        |
| 7860                | Copernicus Group IRB, One Triangle Drive, Suite 100, PO Box 110605, 27709, Durham, United States of America                | Veit, Dr Glenn                     | 09-Oct-2012                        |
| 7864                | Copernicus Group IRB, One Triangle Drive, Suite 100, PO Box 110605, 27709, Durham, United States of America                | Veit, Dr Glenn                     | 05-Oct-2012                        |
| 7865                | Copernicus Group IRB, One Triangle Drive, Suite 100, Research Triangle Park, 27709, Durham, United States of America       | Veit, Dr Glenn                     | 04-Oct-2012                        |
| 7866                | Copernicus Group IRB, One Triangle Drive, Suite 100, PO Box 110605, 27709, Durham, United States of America                | Veit, Dr Glenn                     | 10-Oct-2012                        |
| 7868                | Copernicus Group IRB, One Triangle Drive, Suite 100, PO Box 110605, 27709, Durham, United States of America                | Veit, Dr Glenn                     | 01-Oct-2012                        |
| 7870                | Copernicus Group IRB, One Triangle Drive, Suite 100, Research Triangle Park, 27709, Durham, United States of America       | Veit, Dr Glenn                     | 02-Oct-2012                        |
| 7871                | Copernicus Group IRB, One Triangle Drive, Suite 100, PO Box 110605, 27709, Durham, United States of America                | Veit, Dr Glenn                     | 02-Oct-2012                        |
| 7872                | Holy Spirit Health System IRB, Heart Center, 3rd Floor, 503 North 21st St, 17011-2288, Camp Hill, United States of America | Schriber, Dr Richard               | 19-Dec-2012                        |
| 7873                | Memorial Hospital of Rhode Island IRB, 111 Brewster St, 02860, Pawtucket, United States of America                         | Weyer, Dr Patrick                  | 27-Aug-2012                        |
| 7874                | Copernicus Group IRB, One Triangle Drive, Suite 100, PO Box 110605, 27709, Durham, United States of America                | Veit, Dr Glenn                     | 02-Oct-2012                        |

| <b>Country Name</b> | <b>Country IRB/IEC Name and Address</b>                                                                                                                                                                  | <b>Chairman of Country IRB/IEC</b> | <b>Country IRB/IEC Actual Date</b> |
|---------------------|----------------------------------------------------------------------------------------------------------------------------------------------------------------------------------------------------------|------------------------------------|------------------------------------|
| 7875                | Penn State College of Medicine Human Subjects Protection Off, Human Subjects Protection Office, Academic Support Bldg, Rm. 1140, 600 Centerview Dr, PO Box 855, 17033, Hershey, United States of America | Gordon, Dr Patricia                | 06-Feb-2013                        |
| 7876                | Guthrie Healthcare System IRB, One Guthrie Square, 18840, Sayre, United States of America                                                                                                                | Lee, Dr Ferrol                     | 03-Jan-2013                        |
| 7877                | New York Methodist Hospital IRB, 506 6th St, Box 159008, 11215, Brooklyn, United States of America                                                                                                       | Balmir, Eric                       | 26-Sep-2012                        |
| 7878                | Copernicus Group IRB, One Triangle Drive, Suite 100, PO Box 110605, 27709, Durham, United States of America                                                                                              | Veit, Dr Glenn                     | 01-Oct-2012                        |
| 7879                | Copernicus Group IRB, One Triangle Drive, Suite 100, PO Box 110605, 27709, Durham, United States of America                                                                                              | Veit, Dr Glenn                     | 01-Oct-2012                        |
| 7880                | Copernicus Group IRB, One Triangle Drive, Suite 100, PO Box 110605, 27709, Durham, United States of America                                                                                              | Veit, Dr Glenn                     | 11-Oct-2012                        |
| 7883                | Copernicus Group IRB, One Triangle Drive, Suite 100, PO Box 110605, 27709, Durham, United States of America                                                                                              | Veit, Dr Glenn                     | 25-Oct-2012                        |
| 7884                | Copernicus Group IRB, One Triangle Drive, Suite 100, PO Box 110605, 27709, Durham, United States of America                                                                                              | Veit, Dr Glenn                     | 04-Oct-2012                        |
| 7885                | EC Drexel University, 1505 Race St, Bellet Bldg, 7th Flr, Ste. 722, 19102, Philadelphia, United States of America                                                                                        | Carpenter, Lois                    | 27-Dec-2012                        |
| 7887                | New York Medical College IRB, 40 Sunshine Cottage Rd, 10595, Valhalla, United States of America                                                                                                          | Golombek, Dr Sergio                | 26-Oct-2012                        |
| 7888                | Copernicus Group IRB, One Triangle Drive, Suite 100, PO Box 110605, 27709, Durham, United States of America                                                                                              | Veit, Dr Glenn                     | 04-Oct-2012                        |
| 7889                | Copernicus Group IRB, One Triangle Drive, Suite 100, PO Box 110605, 27709, Durham, United States of America                                                                                              | Veit, Dr Glenn                     | 25-Oct-2012                        |
| 7891                | Copernicus Group IRB, One Triangle Drive, Suite 100, PO Box 110605, 27709, Durham, United States of America                                                                                              | Veit, Dr Glenn                     | 02-Oct-2012                        |

| <b>Country Name</b> | <b>Country IRB/IEC Name and Address</b>                                                                            | <b>Chairman of Country IRB/IEC</b> | <b>Country IRB/IEC Actual Date</b> |
|---------------------|--------------------------------------------------------------------------------------------------------------------|------------------------------------|------------------------------------|
| 7892                | Copernicus Group IRB, One Triangle Drive, Suite 100, PO Box 110605, 27709, Durham, United States of America        | Veit, Glenn                        | 01-Oct-2012                        |
| 7893                | EC Jacobi Medical Center, Bldg.1 Research Office, 6W4, 1400 Pelham Pkwy, S, 10461, Bronx, United States of America | Vazquez, Walter                    | 20-Nov-2012                        |
| 7895                | Bridgeport Hospital IRB, 267 Grant St, 06610, Bridgeport, United States of America                                 | Hutchinson, Dr Karen               | 15-Feb-2013                        |
| 7896                | Copernicus Group IRB, One Triangle Drive, Suite 100, PO Box 110605, 27709, Durham, United States of America        | Veit, Dr Glenn                     | 25-Oct-2012                        |
| 7898                | Copernicus Group IRB, One Triangle Drive, Suite 100, PO Box 110605, 27709, Durham, United States of America        | Schultz, Dr Theodore               | 18-Oct-2012                        |
| 7904                | Duke University Health System IRB, 2424 Erwin Road, Suite 405, Hock Plaza, 27705, Durham, United States of America | Swamy, Dr Geeta                    | 11-Feb-2013                        |
| 7905                | Forsyth Medical Center IRB, 3333 Silas Creek Pkwy, 27103, Winston-Salem, United States of America                  | Walley, Dr Bruce                   | 01-Nov-2012                        |
| 7906                | Copernicus Group IRB, One Triangle Drive, Suite 100, PO Box 110605, 27709, Durham, United States of America        | Veit, Dr Glenn                     | 01-Oct-2012                        |
| 7909                | Copernicus Group IRB, One Triangle Drive, Suite 100, PO Box 110605, 27709, Durham, United States of America        | Veit, Dr Glenn                     | 09-Oct-2012                        |
| 7910                | Copernicus Group IRB, One Triangle Drive, Suite 100, PO Box 110605, 27709, Durham, United States of America        | Veit, Dr Glenn                     | 23-Oct-2012                        |
| 7913                | Copernicus Group IRB<br>PO Box 110605<br>Research Triangle Park, NC 27709                                          | Veit, Glenn                        | 01-Oct-2012                        |
| 7914                | EC Memphis Gastroenterology Group, 1030 Jefferson Ave, 38104, Memphis, United States of America                    | Edwards, Timmye                    | 26-Jun-2013                        |
| 7916                | Copernicus Group IRB, One Triangle Drive, Suite 100, PO Box 110605, 27709, Durham, United States of America        | Veit, Dr Glenn                     | 05-Nov-2012                        |

| <b>Country Name</b> | <b>Country IRB/IEC Name and Address</b>                                                                     | <b>Chairman of Country IRB/IEC</b> | <b>Country IRB/IEC Actual Date</b> |
|---------------------|-------------------------------------------------------------------------------------------------------------|------------------------------------|------------------------------------|
| 7917                | Copernicus Group IRB, One Triangle Drive, Suite 100, PO Box 110605, 27709, Durham, United States of America | Veit, Dr Glenn                     | 09-Nov-2012                        |
| 7919                | Copernicus Group IRB, One Triangle Drive, Suite 100, PO Box 110605, 27709, Durham, United States of America | Veit, Dr Glenn                     | 22-Oct-2012                        |
| 7920                | Moses H Cone Memorial Hospital, 1200 North Elm Street, 27401, Greensboro, United States of America          | Wilson, Dr Charles                 | 03-Oct-2012                        |
| 7921                | Copernicus Group IRB, One Triangle Drive, Suite 100, PO Box 110605, 27709, Durham, United States of America | Veit, Dr Glenn                     | 04-Oct-2012                        |
| 7922                | Copernicus Group IRB, One Triangle Drive, Suite 100, PO Box 110605, 27709, Durham, United States of America | Veit, Dr Glenn                     | 01-Oct-2012                        |
| 7923                | Copernicus Group IRB, One Triangle Drive, Suite 100, PO Box 110605, 27709, Durham, United States of America | Veit, Dr Glenn                     | 09-Oct-2012                        |
| 7924                | Copernicus Group IRB, One Triangle Drive, Suite 100, PO Box 110605, 27709, Durham, United States of America | Veit, Dr Glenn                     | 05-Nov-2012                        |
| 7925                | Copernicus Group IRB, One Triangle Drive, Suite 100, PO Box 110605, 27709, Durham, United States of America | Veit, Dr Glenn                     | 24-Oct-2012                        |
| 7926                | Copernicus Group IRB, One Triangle Drive, Suite 100, PO Box 110605, 27709, Durham, United States of America | Veit, Dr Glenn                     | 09-Nov-2012                        |
| 7927                | Baptist Hospital Clinical Research, 1000 W. Moreno Street, 32501, Pensacola, United States of America       | Hoffman, Dr Jayne                  | 28-Jan-2013                        |
| 7929                | Copernicus Group IRB, One Triangle Drive, Suite 100, PO Box 110605, 27709, Durham, United States of America | Veit, Dr Glenn                     | 09-Nov-2012                        |
| 7931                | University Hospital, 1350 Walton Way, 30901, Augusta, United States of America                              | Chandler, Dr Arthur                | 18-Oct-2012                        |
| 7933                | Copernicus Group IRB, One Triangle Drive, Suite 100, PO Box 110605, 27709, Durham, United States of America | Veit, Dr Glenn                     | 02-Oct-2012                        |

| <b>Country Name</b> | <b>Country IRB/IEC Name and Address</b>                                                                                             | <b>Chairman of Country IRB/IEC</b> | <b>Country IRB/IEC Actual Date</b> |
|---------------------|-------------------------------------------------------------------------------------------------------------------------------------|------------------------------------|------------------------------------|
| 7935                | Copernicus Group IRB, One Triangle Drive, Suite 100, PO Box 110605, 27709, Durham, United States of America                         | Veit, Dr Glenn                     | 03-Oct-2012                        |
| 7937                | Copernicus Group IRB, One Triangle Drive, Suite 100, PO Box 110605, 27709, Durham, United States of America                         | Veit, Dr Glenn                     | 10-Oct-2012                        |
| 7938                | Copernicus Group IRB, One Triangle Drive, Suite 100, PO Box 110605, 27709, Durham, United States of America                         | Veit, Dr Glenn                     | 28-Nov-2012                        |
| 7939                | Copernicus Group IRB, One Triangle Drive, Suite 100, PO Box 110605, 27709, Durham, United States of America                         | Veit, Dr Glenn                     | 16-Oct-2012                        |
| 7941                | Copernicus Group IRB, One Triangle Drive, Suite 100, PO Box 110605, 27709, Durham, United States of America                         | Veit, Dr Glenn                     | 01-Nov-2012                        |
| 7944                | EC V.A. New Jersey Healthcare System Dep of Res, 385 Tremont Ave, Bldg. 11, Room 117b, 07018, East Orange, United States of America | Sastrasinh, Dr Sithiporn           | 09-Nov-2012                        |
| 7945                | Copernicus Group IRB, One Triangle Drive, Suite 100, PO Box 110605, 27709, Durham, United States of America                         | Veit, Dr Glenn                     | 01-Nov-2012                        |
| 7947                | Carl T Hayden VAMC IRB, 650 E. Indian School Road, 85012, Phoenix, United States of America                                         | Carrera, Dr Carlos                 | 28-May-2013                        |
| 7948                | Hunterdon Medical Center Institutional Review Board, 2100 Westcott Drive, 08822, Flemington, United States of America               | Coates, Dr Robert                  | 15-Jan-2013                        |
| 7950                | UCSF Committee on Human Research, 3333 California Street, Suite 315, 94118, San Francisco, United States of America                 | Jones, Reese                       | 27-Oct-2012                        |
| 7951                | Copernicus Group IRB, One Triangle Drive, Suite 100, PO Box 110605, 27709, Durham, United States of America                         | Veit, Dr Glenn                     | 06-Dec-2012                        |
| 7954                | EC Mercy Hospital and Medical Center, Pediatrics, 2525 S Michigan Ave, 60616, Chicago, United States of America                     | Vasa, Dr Rohitkumar                | 26-Oct-2012                        |
| 7955                | Copernicus Group IRB, One Triangle Drive, Suite 100, PO Box 110605, 27709, Durham, United States of America                         | Veit, Dr Glenn                     | 07-Jan-2013                        |

| <b>Country Name</b> | <b>Country IRB/IEC Name and Address</b>                                                                                               | <b>Chairman of Country IRB/IEC</b> | <b>Country IRB/IEC Actual Date</b> |
|---------------------|---------------------------------------------------------------------------------------------------------------------------------------|------------------------------------|------------------------------------|
| 7956                | Copernicus Group IRB, One Triangle Drive, Suite 100, PO Box 110605, 27709, Durham, United States of America                           | Veit, Dr Glenn                     | 01-Nov-2012                        |
| 7957                | NYU School of Medicine IRB, 1 Park Ave, 6th Floor, 10016, New York, United States of America                                          | Czelsler, Elan                     | 08-Jan-2013                        |
| 7958                | Greenville Health System IRB, Greenville Hospital System, 890 W Faris Rd, MMOB, Ste. 550, 29605, Greenville, United States of America | Wright, Dr Christopher             | 29-Nov-2012                        |
| 7959                | Copernicus Group IRB, One Triangle Drive, Suite 100, PO Box 110605, 27709, Durham, United States of America                           | Veit, Dr Glenn                     | 26-Oct-2012                        |
| 7960                | Copernicus Group IRB, One Triangle Drive, Suite 100, PO Box 110605, 27709, Durham, United States of America                           | Veit, Dr Glenn                     | 01-Oct-2012                        |
| 7961                | Copernicus Group IRB, One Triangle Drive, Suite 100, PO Box 110605, 27709, Durham, United States of America                           | Veit, Dr Glenn                     | 04-Oct-2012                        |
| 7963                | Memorial Hospital IRB, 325 S Belmont St, 17403, York, United States of America                                                        | Spangler, Dr Michael               | 10-Apr-2013                        |
| 7964                | Copernicus Group IRB, One Triangle Drive, Suite 100, PO Box 110605, 27709, Durham, United States of America                           | Veit, Dr Glenn                     | 17-Oct-2012                        |
| 7965                | Copernicus Group IRB, One Triangle Drive, Suite 100, PO Box 110605, 27709, Durham, United States of America                           | Veit, Dr Glenn                     | 04-Oct-2012                        |
| 7966                | Radiological Associates of Sacramento, 4001 J St, 95819, Sacramento, United States of America                                         | Young, Patti                       | 18-Oct-2012                        |
| 7969                | Copernicus Group IRB, One Triangle Drive, Suite 100, PO Box 110605, 27709, Durham, United States of America                           | Veit, Dr Glenn                     | 25-Oct-2012                        |
| 7971                | Piedmont Cardiology Associates, 1325 Spring St, 29646, Greenwood, United States of America                                            | Mappin, Dr F.                      | 16-Apr-2013                        |
| 7972                | Copernicus Group IRB, One Triangle Drive, Suite 100, PO Box 110605, 27709, Durham, United States of America                           | Veit, Dr Glenn                     | 19-Oct-2012                        |

| <b>Country Name</b> | <b>Country IRB/IEC Name and Address</b>                                                                               | <b>Chairman of Country IRB/IEC</b> | <b>Country IRB/IEC Actual Date</b> |
|---------------------|-----------------------------------------------------------------------------------------------------------------------|------------------------------------|------------------------------------|
| 7973                | Copernicus Group IRB, One Triangle Drive, Suite 100, PO Box 110605, 27709, Durham, United States of America           | Veit, Dr Glenn                     | 04-Oct-2012                        |
| 7974                | Copernicus Group IRB, One Triangle Drive, Suite 100, PO Box 110605, 27709, Durham, United States of America           | Veit, Dr Glenn                     | 31-Oct-2012                        |
| 7978                | Copernicus Group IRB, One Triangle Drive, Suite 100, PO Box 110605, 27709, Durham, United States of America           | Veit, Dr Glenn                     | 26-Sep-2012                        |
| 7981                | Copernicus Group IRB, One Triangle Drive, Suite 100, PO Box 110605, 27709, Durham, United States of America           | Veit, Dr Glenn                     | 04-Oct-2012                        |
| 7982                | Copernicus Group IRB, One Triangle Drive, Suite 100, PO Box 110605, 27709, Durham, United States of America           | Veit, Dr Glenn                     | 08-Apr-2013                        |
| 7983                | V.A. Palo Alto Health Care System, 1501 S California Ave, 94304, Palo Alto, United States of America                  | Molvi, Dr Celia                    | 02-Oct-2012                        |
| 7984                | EC Health Care Research Center, 3635 Vista at Grand Blvd, 63104, St. Louis, United States of America                  | Fink, Melissa                      | 09-Aug-2013                        |
| 7985                | Copernicus Group IRB, One Triangle Drive, Suite 100, PO Box 110605, 27709, Durham, United States of America           | Veit, Dr Glenn                     | 24-Oct-2012                        |
| 7987                | Biomedical Research Alliance of New York, LLC IRB, 111 East 210th St, 10467, Bronx, United States of America          | Sinnett, Dr Mark                   | 19-Feb-2013                        |
| 7988                | Copernicus Group IRB, One Triangle Drive, Suite 100, PO Box 110605, 27709, Durham, United States of America           | Veit, Dr Glenn                     | 24-Oct-2012                        |
| 7990                | EC Program for the Protection of Human Subjects, One Gustave L. Levy Place, 10029, New York, United States of America | Martin, Glenn                      | 27-Feb-2013                        |
| 7993                | Copernicus Group IRB, One Triangle Drive, Suite 100, PO Box 110605, 27709, Durham, United States of America           | Veit, Dr Glenn                     | 14-Nov-2012                        |
| 7994                | Vanderbilt University Nashville Campus, 1310 24th Avenue, South, 37212, Nashville, United States of America           | Muldowney, James                   | 19-Aug-2013                        |

| <b>Country Name</b> | <b>Country IRB/IEC Name and Address</b>                                                                                                                                   | <b>Chairman of Country IRB/IEC</b> | <b>Country IRB/IEC Actual Date</b> |
|---------------------|---------------------------------------------------------------------------------------------------------------------------------------------------------------------------|------------------------------------|------------------------------------|
| 7995                | Copernicus Group IRB, One Triangle Drive, Suite 100, PO Box 110605, 27709, Durham, United States of America                                                               | Veit, Dr Glenn                     | 01-Oct-2012                        |
| 7996                | Western IRB, 3535 Seventh Ave SW, PO Box 12029, 98508, Olympia, United States of America                                                                                  | Wilkins, Mr R                      | 06-Dec-2012                        |
| 7997                | IRB University of North Carolina School of Medicine, 105 Mason Farm Road, Medical School Building 52, Room 24, CB 7097, 27599-7097, Chapel Hill, United States of America | Nelson, Dr Dan                     | 20-Dec-2012                        |
| 7998                | Northwestern University Institutional Review Board, 750 N. Lake Shore Drive, Arthur Rubloff Building, 7th Floor, 60611, Chicago, United States of America                 | Yates, Eileen                      | 16-May-2013                        |
| 8002                | Copernicus Group IRB, One Triangle Drive, Suite 100, PO Box 110605, 27709, Durham, United States of America                                                               | Veit, Dr Glenn                     | 12-Dec-2012                        |
| 8003                | Copernicus Group IRB, One Triangle Drive, Suite 100, PO Box 110605, 27709, Durham, United States of America                                                               | Veit, Dr Glenn                     | 29-Oct-2012                        |
| 8004                | Committee for the Protection of Human Subjects in Research, 55 Lake Ave, N, 01655, Worcester, United States of America                                                    | Osullivan, Dr Brian                | 20-Feb-2013                        |
| 8006                | Chesapeake IRB, 6940 Columbia Gateway Drive, Suite 110, Chesapeake, United States of America                                                                              | Priest, Troy                       | 12-Nov-2012                        |
| 8008                | Copernicus Group IRB, One Triangle Drive, Suite 100, PO Box 110605, 27709, Durham, United States of America                                                               | Veit, Dr Glenn                     | 15-Oct-2012                        |
| 8009                | Copernicus Group IRB, One Triangle Drive, Suite 100, PO Box 110605, 27709, Durham, United States of America                                                               | Veit, Dr Glenn                     | 12-Nov-2012                        |
| 8018                | Western Institutional Review Board, 1019 39th Ave SE, Suite 120, 98374, Puyallup, United States of America                                                                | Schultz, Dr Theodore               | 24-Jan-2013                        |
| 8021                | Western Institutional Review Board, 1019 39th Ave SE, Suite 120, 98374, Puyallup, United States of America                                                                | Schultz, Dr Theodore               | 15-May-2013                        |

| <b>Country Name</b> | <b>Country IRB/IEC Name and Address</b>                                                                                                  | <b>Chairman of Country IRB/IEC</b> | <b>Country IRB/IEC Actual Date</b> |
|---------------------|------------------------------------------------------------------------------------------------------------------------------------------|------------------------------------|------------------------------------|
| 8024                | Copernicus Group IRB, One Triangle Drive, Suite 100, PO Box 110605, 27709, Durham, United States of America                              | Veit, Dr Glenn                     | 25-Oct-2012                        |
| 8026                | EC Saint Lukes Cardiovascular Consultants, 4320 Wornall Rd, MP1, Ste. 128, 64111, Kansas City, United States of America                  | Dark, Dr Diana                     | 16-Nov-2012                        |
| 8028                | Copernicus Group IRB, One Triangle Drive, Suite 100, PO Box 110605, 27709, Durham, United States of America                              | Veit, Dr Glenn                     | 01-Nov-2012                        |
| 8029                | Western Institutional Review Board, 1019 39th Ave SE, Suite 120, 98374, Puyallup, United States of America                               | Wilkins, Mr R                      | 10-Dec-2012                        |
| 8030                | EC Research Subject Protection Program, 836 N. 12th Street, 53233, Milwaukee, United States of America                                   | Weir, Brian                        | 17-Jan-2013                        |
| 8032                | Copernicus Group IRB, One Triangle Drive, Suite 100, Research Triangle Park, 27709, Durham, United States of America                     | Veit, Dr Glenn                     | 14-Nov-2012                        |
| 8034                | Copernicus Group IRB, One Triangle Drive, Suite 100, PO Box 110605, 27709, Durham, United States of America                              | Veit, Dr Glenn                     | 18-Oct-2012                        |
| 8039                | Copernicus Group IRB, One Triangle Drive, Suite 100, PO Box 110605, 27709, Durham, United States of America                              | Veit, Dr Glenn                     | 03-Oct-2012                        |
| 8041                | Copernicus Group IRB, One Triangle Drive, Suite 100, PO Box 110605, 27709, Durham, United States of America                              | Veit, Dr Glenn                     | 09-Oct-2012                        |
| 8043                | Copernicus Group IRB, One Triangle Drive, Suite 100, PO Box 110605, 27709, Durham, United States of America                              | Veit, Dr Glenn                     | 22-Oct-2012                        |
| 8048                | EC Tallahassee Memorial Hospital, 1634 North Plaza Dr, 32308, Tallahassee, United States of America                                      | Deeb, Dr Larry                     | 06-Nov-2012                        |
| 8049                | University of Pennsylvania Office of Regulatory Affairs, 3624 Market St, Suite 301 S, 19104-6066, Philadelphia, United States of America | Ziolek, Tracy                      | 24-Jan-2013                        |
| 8050                | Copernicus Group IRB, One Triangle Drive, Suite 100, PO Box 110605, 27709, Durham, United States of America                              | Veit, Dr Glenn                     | 02-Oct-2012                        |

| <b>Country Name</b> | <b>Country IRB/IEC Name and Address</b>                                                                                         | <b>Chairman of Country IRB/IEC</b> | <b>Country IRB/IEC Actual Date</b> |
|---------------------|---------------------------------------------------------------------------------------------------------------------------------|------------------------------------|------------------------------------|
| 8054                | Christiana Care IRB, Helen F Graham Cancer Center, 4701 Ogletown-Stanton Rd, Ste. 2350, 19713, Newark, United States of America | Castellano, Jerry                  | 05-Mar-2013                        |
| 8055                | Copernicus Group IRB, One Triangle Drive, Suite 100, PO Box 110605, 27709, Durham, United States of America                     | Veit, Dr Glenn                     | 04-Oct-2012                        |
| 8057                | Copernicus Group IRB, One Triangle Drive, Suite 100, PO Box 110605, 27709, Durham, United States of America                     | Veit, Dr Glenn                     | 25-Oct-2012                        |
| 8058                | Copernicus Group IRB, One Triangle Drive, Suite 100, PO Box 110605, 27709, Durham, United States of America                     | Veit, Dr Glenn                     | 01-Oct-2012                        |
| 8060                | EC Student Faculty Building, 3340 N. Broad St, Ste. 304, 19140, Philadelphia, United States of America                          | Gudderra, Nanda                    | 11-Mar-2013                        |
| 8061                | Atlantic Health System IRB, 475 South St, 07960, Morristown, United States of America                                           | Bond, Ms Anita                     | 14-Feb-2013                        |
| 8062                | Western Institutional Review Board, 1019 39th Ave SE, Suite 120, 98374, Puyallup, United States of America                      | Schultz, Dr Theodore               | 07-Mar-2013                        |
| 8063                | Copernicus Group IRB, One Triangle Drive, Suite 100, PO Box 110605, 27709, Durham, United States of America                     | Veit, Dr Glenn                     | 02-Oct-2012                        |
| 8065                | St Vincent Health IRB, 10330 N Meridian St, 46290, Indianapolis, United States of America                                       | Hodgin, Dr P                       | 17-Oct-2012                        |
| 8066                | Copernicus Group IRB, One Triangle Drive, Suite 100, PO Box 110605, 27709, Durham, United States of America                     | Veit, Dr Glenn                     | 31-Jan-2013                        |
| 8067                | Copernicus Group IRB, One Triangle Drive, Suite 100, PO Box 110605, 27709, Durham, United States of America                     | Veit, Dr Glenn                     | 13-Nov-2012                        |
| 8069                | Elkhart General Healthcare System IRB, 600 East Boulevard, 46514, Elkhart, United States of America                             | Cover, Darra                       | 02-Nov-2012                        |
| 8072                | EC Cleveland Clinic Foundation, 25875 Science Park Dr, AC 121, 44123, Beachwood, United States of America                       | Howard, Bridget                    | 15-Jan-2013                        |
| 8075                | IRB Central Arkansas Veterans Healthcare System, 4300 West 7th St, 72205, Little Rock, United States of America                 | Johnson, Jerrell                   | 04-Feb-2013                        |

| <b>Country Name</b> | <b>Country IRB/IEC Name and Address</b>                                                                                                          | <b>Chairman of Country IRB/IEC</b> | <b>Country IRB/IEC Actual Date</b> |
|---------------------|--------------------------------------------------------------------------------------------------------------------------------------------------|------------------------------------|------------------------------------|
| 8076                | Washington State University Spokane IRB, Wegner 105, 99164-6510, Pullman, United States of America                                               | Jandhyala, Malathi                 | 05-Feb-2013                        |
| 8077                | Spectrum Health, 25 E Michigan, Ste. 4300, 49503, Grand Rapids, United States of America                                                         | Jones, Dr Jeff                     | 18-Jan-2013                        |
| 8079                | Mercy Medical Center, Des Moines IRB, 1111 6th Ave, 50314, Des Moines, United States of America                                                  | White, Dr Martha                   | 18-Jan-2013                        |
| 8080                | University of Colorado Health IRB, 3702 Automation Way, Suite 200, 80525, Fort Collins, United States of America                                 | Blonder, Ronald                    | 17-Sep-2012                        |
| 8081                | Copernicus Group IRB, One Triangle Drive, Suite 100, PO Box 110605, 27709, Durham, United States of America                                      | Veit, Dr Glenn                     | 14-Nov-2012                        |
| 8082                | VA Loma Linda Health Care System Research Service (151), 11201 Benton Street, 92357, Loma Linda, United States of America                        | Bohlen, Donna                      | 25-Apr-2013                        |
| 8084                | Copernicus Group IRB, One Triangle Drive, Suite 100, PO Box 110605, 27709, Durham, United States of America                                      | Veit, Dr Glenn                     | 15-Nov-2012                        |
| 8085                | Copernicus Group IRB, One Triangle Drive, Suite 100, PO Box 110605, 27709, Durham, United States of America                                      | Tuschen, James                     | 18-Oct-2012                        |
| 8086                | McLaren Health Care Human Research Protection Program IRB, McLaren Research Dept 3N, 401 S Ballenger Hwy, 48532, Flint, United States of America | Wolowiec, Dr Kathy                 | 21-Sep-2012                        |
| 8089                | Trinity Medical Center IRB, 2701 17th St, 61201, Rock Island, United States of America                                                           | Elmendorf, Dr Charles              | 10-Dec-2012                        |
| 8090                | Copernicus Group IRB, One Triangle Drive, Suite 100, PO Box 110605, 27709, Durham, United States of America                                      | Veit, Dr Glenn                     | 25-Oct-2012                        |
| 8093                | Mercy Health Partners IRB, 1500 E Sherman Blvd, 49444, Muskegon, United States of America                                                        | Hoffman, Brenda                    | 11-Sep-2012                        |
| 8094                | Copernicus Group IRB, One Triangle Drive, Suite 100, PO Box 110605, 27709, Durham, United States of America                                      | Veit, Dr Glenn                     | 01-Oct-2012                        |

| <b>Country Name</b> | <b>Country IRB/IEC Name and Address</b>                                                                                                        | <b>Chairman of Country IRB/IEC</b> | <b>Country IRB/IEC Actual Date</b> |
|---------------------|------------------------------------------------------------------------------------------------------------------------------------------------|------------------------------------|------------------------------------|
| 8095                | Aspirus Wausau Hospital IRB, 333 Pine Ridge Blvd, 54401, Wausau, United States of America                                                      | Opatik, Lisa                       | 18-Dec-2012                        |
| 8096                | Copernicus Group IRB, One Triangle Drive, Suite 100, PO Box 110605, 27709, Durham, United States of America                                    | Veit, Dr Glenn                     | 05-Oct-2012                        |
| 8097                | Copernicus Group IRB, One Triangle Drive, Suite 100, PO Box 110605, 27709, Durham, United States of America                                    | Veit, Dr Glenn                     | 03-Oct-2012                        |
| 8099                | McLaren Health Center HRPP, 1198 N Belsay Road, Building #1, 48509, Burton, United States of America                                           | Hatachet, Dr M.                    | 21-Sep-2012                        |
| 8102                | Copernicus Group IRB, One Triangle Drive, Suite 100, PO Box 110605, 27709, Durham, United States of America                                    | Veit, Dr Glenn                     | 01-Oct-2012                        |
| 8103                | IRB UCSD Human Research Protections Program, 9500 Gilman Dr, Mail Code 0052, 92093, La Jolla, United States of America                         | Magit, Dr Anthony                  | 20-Jun-2013                        |
| 8105                | Western Institutional Review Board IRB, 1019 39th Ave SE, Suite 120, 98374-2115, Puyallup, United States of America                            | Wilkins, Robert                    | 24-Oct-2012                        |
| 8107                | Copernicus Group IRB, One Triangle Drive, Suite 100, PO Box 110605, 27709, Durham, United States of America                                    | Veit, Dr Glenn                     | 02-Nov-2012                        |
| 8108                | University of Texas Health Science Center at Tyler IRB, Center for Clinical Research, 11937 US Hwy 271, 75708, Tyler, United States of America | Sartor, Mr Joe                     | 19-Feb-2013                        |
| 8112                | EC Saint Anthonys Medical Center, 4th Floor, Research, St. Louis, 63128, St. Louis, United States of America                                   | Fonseca, Dr Peter                  | 24-Jan-2013                        |
| 8114                | EC Essentia Health Saint Mary's Medical Center, 502 E 2nd St, 55805, Duluth, United States of America                                          | Tanner, Mary                       | 16-Nov-2012                        |
| 8116                | Copernicus Group IRB, One Triangle Drive, Suite 100, PO Box 110605, 27709, Durham, United States of America                                    | Veit, Dr Glenn                     | 16-Apr-2013                        |
| 8117                | Copernicus Group IRB, One Triangle Drive, Suite 100, PO Box 110605, 27709, Durham, United States of America                                    | Veit, Dr Glenn                     | 11-Oct-2012                        |

| <b>Country Name</b> | <b>Country IRB/IEC Name and Address</b>                                                                      | <b>Chairman of Country IRB/IEC</b> | <b>Country IRB/IEC Actual Date</b> |
|---------------------|--------------------------------------------------------------------------------------------------------------|------------------------------------|------------------------------------|
| 8118                | EC Saint Cloud Hospital IRB, 1406 Sixth Ave, N, 56303, St. Cloud, United States of America                   | Phipps, Mary                       | 17-Aug-2012                        |
| 8119                | Copernicus Group IRB, One Triangle Drive, Suite 100, PO Box 110605, 27709, Durham, United States of America  | Veit, Dr Glenn                     | 01-Oct-2012                        |
| 8123                | Copernicus Group IRB, One Triangle Drive, Suite 100, PO Box 110605, 27709, Durham, United States of America  | Veit, Dr Glenn                     | 10-Oct-2012                        |
| 8124                | Copernicus Group IRB, One Triangle Drive, Suite 100, PO Box 110605, 27709, Durham, United States of America  | Veit, Dr Glenn                     | 01-Oct-2012                        |
| 8125                | Mercy Hospital Saint Louis IRB, 625 S. New Ballas Rd, Suite 2010, 63141, St. Louis, United States of America | Wilkaitis, Dr Nancy                | 07-Feb-2013                        |
| 8127                | Copernicus Group IRB, One Triangle Drive, Suite 100, PO Box 110605, 27709, Durham, United States of America  | Veit, Dr Glenn                     | 09-Oct-2012                        |
| 8129                | Copernicus Group IRB, One Triangle Drive, Suite 100, PO Box 110605, 27709, Durham, United States of America  | Veit, Dr Glenn                     | 02-Oct-2012                        |
| 8130                | Copernicus Group IRB, One Triangle Drive, Suite 100, PO Box 110605, 27709, Durham, United States of America  | Veit, Dr Glenn                     | 03-Oct-2012                        |
| 8131                | Copernicus Group IRB, One Triangle Drive, Suite 100, PO Box 110605, 27709, Durham, United States of America  | Veit, Dr Glenn                     | 05-Oct-2012                        |
| 8132                | Copernicus Group IRB, One Triangle Drive, Suite 100, PO Box 110605, 27709, Durham, United States of America  | Veit, Dr Glenn                     | 24-Oct-2012                        |
| 8133                | Copernicus Group IRB, One Triangle Drive, Suite 100, PO Box 110605, 27709, Durham, United States of America  | Veit, Dr Glenn                     | 18-Feb-2013                        |
| 8134                | Copernicus Group IRB, One Triangle Drive, Suite 100, PO Box 110605, 27709, Durham, United States of America  | Veit, Dr Glenn                     | 31-Oct-2012                        |
| 8136                | Copernicus Group IRB, One Triangle Drive, Suite 100, PO Box 110605, 27709, Durham, United States of America  | Veit, Dr Glenn                     | 04-Oct-2012                        |

| <b>Country Name</b> | <b>Country IRB/IEC Name and Address</b>                                                                              | <b>Chairman of Country IRB/IEC</b> | <b>Country IRB/IEC Actual Date</b> |
|---------------------|----------------------------------------------------------------------------------------------------------------------|------------------------------------|------------------------------------|
| 8137                | Copernicus Group IRB, One Triangle Drive, Suite 100, PO Box 110605, 27709, Durham, United States of America          | Veit, Dr Glenn                     | 02-Nov-2012                        |
| 8140                | Copernicus Group IRB, One Triangle Drive, Suite 100, Research Triangle Park, 27709, Durham, United States of America | Veit, Dr Glenn                     | 13-Feb-2013                        |
| 8141                | Sutter Health IRB (SHIRB), 2200 Webster Street, 5th Floor, 94115, San Francisco, United States of America            | Young, Patti                       | 23-Oct-2012                        |
| 8142                | Dignity Health IRB, 4001 J St, 95819, Sacramento, United States of America                                           | Weiner, Dr Craig                   | 26-Nov-2012                        |
| 8144                | EC Torrance Memorial Medical Center, 3330 Lomita Blvd, 90505, Torrance, United States of America                     | Blakey, Dr John                    | 31-Jan-2013                        |
| 8145                | Copernicus Group IRB, One Triangle Drive, Suite 100, PO Box 110605, 27709, Durham, United States of America          | Veit, Dr Glenn                     | 01-Oct-2012                        |
| 8146                | Copernicus Group IRB, One Triangle Drive, Suite 100, PO Box 110605, 27709, Durham, United States of America          | Veit, Dr Glenn                     | 08-Nov-2012                        |
| 8148                | Copernicus Group IRB, One Triangle Drive, Suite 100, PO Box 110605, 27709, Durham, United States of America          | Veit, Dr Glenn                     | 11-Oct-2012                        |
| 8151                | Copernicus Group IRB, One Triangle Drive, Suite 100, PO Box 110605, 27709, Durham, United States of America          | Veit, Dr Glenn                     | 12-Nov-2012                        |
| 8154                | Copernicus Group IRB, One Triangle Drive, Suite 100, PO Box 110605, 27709, Durham, United States of America          | Veit, Dr Glenn                     | 29-Jan-2013                        |
| 8155                | Florida Hospital Tampa Bay Division IRB, 3100 E Fletcher Ave, 33613, Tampa, United States of America                 | Lambert, Dr Charles                | 18-Jan-2013                        |
| 8157                | Copernicus Group IRB, One Triangle Drive, Suite 100, PO Box 110605, 27709, Durham, United States of America          | Veit, Dr Glenn                     | 21-Aug-2012                        |
| 8159                | Copernicus Group IRB, One Triangle Drive, Suite 100, PO Box 110605, 27709, Durham, United States of America          | Veit, Dr Glenn                     | 08-Oct-2012                        |

| <b>Country Name</b> | <b>Country IRB/IEC Name and Address</b>                                                                                   | <b>Chairman of Country IRB/IEC</b> | <b>Country IRB/IEC Actual Date</b> |
|---------------------|---------------------------------------------------------------------------------------------------------------------------|------------------------------------|------------------------------------|
| 8161                | Copernicus Group IRB, One Triangle Drive, Suite 100, PO Box 110605, 27709, Durham, United States of America               | Veit, Dr Glenn                     | 02-May-2013                        |
| 8163                | Copernicus Group IRB, One Triangle Drive, Suite 100, PO Box 110605, 27709, Durham, United States of America               | Veit, Dr Glenn                     | 03-Oct-2012                        |
| 8166                | Copernicus Group IRB, One Triangle Drive, Suite 100, PO Box 110605, 27709, Durham, United States of America               | Veit, Dr Glenn                     | 09-Oct-2012                        |
| 8167                | Copernicus Group IRB, One Triangle Drive, Suite 100, PO Box 110605, 27709, Durham, United States of America               | Veit, Dr Glenn                     | 12-Dec-2012                        |
| 8168                | Copernicus Group IRB, One Triangle Drive, Suite 100, PO Box 110605, 27709, Durham, United States of America               | Veit, Dr Glenn                     | 09-Oct-2012                        |
| 8169                | Copernicus Group IRB, One Triangle Drive, Suite 100, PO Box 110605, 27709, Durham, United States of America               | Veit, Dr Glenn                     | 24-Oct-2012                        |
| 8170                | Copernicus Group IRB, One Triangle Drive, Suite 100, PO Box 110605, 27709, Durham, United States of America               | Veit, Dr Glenn                     | 24-Oct-2012                        |
| 8172                | Copernicus Group IRB, One Triangle Drive, Suite 100, PO Box 110605, 27709, Durham, United States of America               | Veit, Dr Glenn                     | 12-Oct-2012                        |
| 8174                | Copernicus Group IRB, One Triangle Drive, Suite 100, PO Box 110605, 27709, Durham, United States of America               | Veit, Dr Glenn                     | 08-Nov-2012                        |
| 8175                | Copernicus Group IRB, One Triangle Drive, Suite 100, PO Box 110605, 27709, Durham, United States of America               | Veit, Dr Glenn                     | 01-Oct-2012                        |
| 8176                | Copernicus Group IRB, One Triangle Drive, Suite 100, PO Box 110605, 27709, Durham, United States of America               | Veit, Dr Glenn                     | 03-Oct-2012                        |
| 8177                | Dallas V.A.Medical Center IRB, 4500 S Lancaster Rd, Mall Code 8C, Mail Code 151C, 75216, Dallas, United States of America | Mortensen, Eric                    | 14-Nov-2012                        |
| 8178                | Copernicus Group IRB, One Triangle Drive, Suite 100, PO Box 110605, 27709, Durham, United States of America               | Veit, Dr Glenn                     | 02-Oct-2012                        |

| <b>Country Name</b> | <b>Country IRB/IEC Name and Address</b>                                                                                         | <b>Chairman of Country IRB/IEC</b> | <b>Country IRB/IEC Actual Date</b> |
|---------------------|---------------------------------------------------------------------------------------------------------------------------------|------------------------------------|------------------------------------|
| 8181                | Copernicus Group IRB, One Triangle Drive, Suite 100, PO Box 110605, 27709, Durham, United States of America                     | Veit, Dr Glenn                     | 02-Oct-2012                        |
| 8182                | Copernicus Group IRB, One Triangle Drive, Suite 100, PO Box 110605, 27709, Durham, United States of America                     | Veit, Dr Glenn                     | 08-Nov-2012                        |
| 8183                | Scottsdale Healthcare/Scottsdale Clinical Research Inst, 10510 N 92nd St, Ste. 300, 85258, Scottsdale, United States of America | Washington, Julie                  | 15-Feb-2013                        |
| 8184                | Copernicus Group IRB, One Triangle Drive, Suite 100, PO Box 110605, 27709, Durham, United States of America                     | Hunt, Peter                        | 11-Oct-2012                        |
| 8185                | University of California-Davis IRB, 2921 Stockton Blvd, Ste 1400, 95817, Sacramento, United States of America                   | Anderson, John                     | 22-Mar-2013                        |
| 8191                | IRB Allina Health System, 920 E 28th St, Ste. 620, 55407, Minneapolis, United States of America                                 | Rogers, Ms Rebecca                 | 18-Mar-2013                        |
| 8194                | University of Minnesota IRB, Cardiovascular Div, 420 Delaware St, SE, MMC 508, 55455, Minneapolis, United States of America     | Harrington, Brandy                 | 20-Oct-2012                        |
| 8195                | Copernicus Group IRB, One Triangle Drive, Suite 100, PO Box 110605, 27709, Durham, United States of America                     | Veit, Dr Glenn                     | 13-Nov-2012                        |
| 8196                | Copernicus Group IRB, One Triangle Drive, Suite 100, Research Triangle Park, 27709, Durham, United States of America            | Veit, Dr Glenn                     | 06-Nov-2012                        |
| 8197                | Copernicus Group IRB, One Triangle Drive, Suite 100, PO Box 110605, 27709, Durham, United States of America                     | Veit, Dr Glenn                     | 08-Nov-2012                        |
| 8199                | Copernicus Group IRB, One Triangle Drive, Suite 100, PO Box 110605, 27709, Durham, United States of America                     | Veit, Dr Glenn                     | 02-Oct-2012                        |
| 8501                | Copernicus Group IRB, One Triangle Drive, Suite 100, Research Triangle Park, 27709, Durham, United States of America            | Veit, Dr Glenn                     | 16-Nov-2012                        |
| 8502                | Doylestown Hospital Institutional Review Board, 595 West State St, 18901, Doylestown, United States of America                  | Brilliant, Dr Lawrence             | 12-Sep-2012                        |

| <b>Country Name</b> | <b>Country IRB/IEC Name and Address</b>                                                                                                                 | <b>Chairman of Country IRB/IEC</b> | <b>Country IRB/IEC Actual Date</b> |
|---------------------|---------------------------------------------------------------------------------------------------------------------------------------------------------|------------------------------------|------------------------------------|
| 8503                | Copernicus Group IRB, One Triangle Drive, Suite 100, PO Box 110605, 27709, Durham, United States of America                                             | Veit, Dr Glenn                     | 01-Oct-2012                        |
| 8506                | Copernicus Group IRB, One Triangle Drive, Suite 100, PO Box 110605, 27709, Durham, United States of America                                             | Veit, Dr Glenn                     | 08-Nov-2012                        |
| 8507                | Institutional Review Board for Human Research, Harborview Office Tower, 19 Hagood Avenue, Suite 601 MSC857, 29425, Charleston, United States of America | Thomas, Dr James C                 | 11-Dec-2012                        |
| 8508                | Providence Hospital IRB, 2435 Forest Drive, 29204, Columbia, United States of America                                                                   | Bryan, Charles                     | 08-Nov-2012                        |
| 8510                | Copernicus Group IRB, One Triangle Drive, Suite 100, PO Box 110605, 27709, Durham, United States of America                                             | Veit, Dr Glenn                     | 04-Oct-2012                        |
| 8511                | Pinnacle Health System IRB, 1000 N Front St, 17043, Wormleysburg, United States of America                                                              | Goldman, Dr John                   | 11-Dec-2012                        |
| 8512                | Dignity Health IRB, 4001 J St, 95815, Sacramento, United States of America                                                                              | Weiner, Dr Craig                   | 18-Oct-2012                        |
| 8513                | Copernicus Group IRB, One Triangle Drive, Suite 100, PO Box 110605, 27709, Durham, United States of America                                             | Veit, Dr Glenn                     | 29-Nov-2012                        |
| 8515                | Copernicus Group IRB, One Triangle Drive, Suite 100, PO Box 110605, 27709, Durham, United States of America                                             | Veit, Dr Glenn                     | 13-Nov-2012                        |
| 8516                | Copernicus Group IRB, One Triangle Drive, Suite 100, PO Box 110605, 27709, Durham, United States of America                                             | Veit, Dr Glenn                     | 13-Nov-2012                        |
| 8518                | Copernicus Group IRB, One Triangle Drive, Suite 100, PO Box 110605, 27709, Durham, United States of America                                             | Veit, Glenn                        | 19-Oct-2012                        |
| 8522                | Copernicus Group IRB, One Triangle Drive, Suite 100, PO Box 110605, 27709, Durham, United States of America                                             | Veit, Dr Glenn                     | 24-Oct-2012                        |
| 8523                | Northside Hospital IRB, 1000 Johnson Ferry Rd, NE, 30342, Atlanta, United States of America                                                             | Pradeep, Jolly                     | 15-Mar-2013                        |

| <b>Country Name</b> | <b>Country IRB/IEC Name and Address</b>                                                                                                                                              | <b>Chairman of Country IRB/IEC</b> | <b>Country IRB/IEC Actual Date</b> |
|---------------------|--------------------------------------------------------------------------------------------------------------------------------------------------------------------------------------|------------------------------------|------------------------------------|
| 8524                | Copernicus Group IRB, One Triangle Drive, Suite 100, PO Box 110605, 27709, Durham, United States of America                                                                          | Veit, Dr Glenn                     | 24-Oct-2012                        |
| 8525                | Copernicus Group IRB, One Triangle Drive, Suite 100, PO Box 110605, 27709, Durham, United States of America                                                                          | Veit, Dr Glenn                     | 16-Nov-2012                        |
| 8526                | Copernicus Group IRB, One Triangle Drive, Suite 100, PO Box 110605, 27709, Durham, United States of America                                                                          | Veit, Dr Glenn                     | 15-Nov-2012                        |
| 8527                | Copernicus Group IRB, One Triangle Drive, Suite 100, PO Box 110605, 27709, Durham, United States of America                                                                          | Veit, Dr Glenn                     | 28-Nov-2012                        |
| 8530                | Copernicus Group IRB, One Triangle Drive, Suite 100, PO Box 110605, 27709, Durham, United States of America                                                                          | Veit, Dr Glenn                     | 19-Nov-2012                        |
| 8531                | Copernicus Group IRB, One Triangle Drive, Suite 100, PO Box 110605, 27709, Durham, United States of America                                                                          | Veit, Dr Glenn                     | 06-Dec-2012                        |
| 8532                | Copernicus Group IRB, One Triangle Drive, Suite 100, PO Box 110605, 27709, Durham, United States of America                                                                          | Veit, Dr Glenn                     | 28-Feb-2013                        |
| 8535                | Copernicus Group IRB, One Triangle Drive, Suite 100, PO Box 110605, 27709, Durham, United States of America                                                                          | Veit, Dr Glenn                     | 26-Dec-2012                        |
| 8537                | Copernicus Group IRB, One Triangle Drive, Suite 100, PO Box 110605, 27709, Durham, United States of America                                                                          | Veit, Dr Glenn                     | 09-Jan-2013                        |
| 8538                | Copernicus Group IRB, One Triangle Drive, Suite 100, PO Box 110605, 27709, Durham, United States of America                                                                          | Veit, Glenn                        | 26-Nov-2012                        |
| 8539                | University of Oklahoma Health Sciences Center IRB, Office of Human Research Protection, 1000 Stanton L. Young Blvd, Library Room 176, 73104, Oklahoma City, United States of America | Harbert, Samantha                  | 28-Jan-2013                        |
| 8540                | Charleston Area Medical Center Health Education and Research, 3110 MacCorkle Ave, SE, 25304, Charleston, United States of America                                                    | Cinco, Angel                       | 22-Apr-2013                        |

| <b>Country Name</b> | <b>Country IRB/IEC Name and Address</b>                                                                               | <b>Chairman of Country IRB/IEC</b> | <b>Country IRB/IEC Actual Date</b> |
|---------------------|-----------------------------------------------------------------------------------------------------------------------|------------------------------------|------------------------------------|
| 8543                | Copernicus Group IRB, One Triangle Drive, Suite 100, PO Box 110605, 27709, Durham, United States of America           | Veit, Dr Glenn                     | 28-Feb-2013                        |
| 8544                | Copernicus Group IRB, One Triangle Drive, Suite 100, PO Box 110605, 27709, Durham, United States of America           | Veit, Dr Glenn                     | 06-Dec-2012                        |
| 8546                | Copernicus Group IRB, One Triangle Drive, Suite 100, Research Triangle Park, 27709, Durham, United States of America  | Veit, Dr Glenn                     | 15-Jan-2013                        |
| 8548                | EC Human Research Protections Office (HRPO), 800 W Baltimore St, Ste. 100, 21201, Baltimore, United States of America | Rosenthal, Dr Robert               | 15-May-2013                        |
| 8549                | Copernicus Group IRB, One Triangle Drive, Suite 100, Research Triangle Park, 27709, Durham, United States of America  | Veit, Dr Glenn                     | 06-Mar-2013                        |
| 8550                | Copernicus Group IRB, One Triangle Drive, Suite 100, PO Box 110605, 27709, Durham, United States of America           | Veit, Dr Glenn                     | 20-Dec-2012                        |
| 8551                | Copernicus Group IRB, One Triangle Drive, Suite 100, PO Box 110605, 27709, Durham, United States of America           | Veit, Dr Glenn                     | 20-Dec-2012                        |
| 8552                | Copernicus Group IRB, One Triangle Drive, Suite 100, Research Triangle Park, 27709, Durham, United States of America  | Veit, Dr Glenn                     | 15-Mar-2013                        |
| 8555                | Duke University Health System IRB, 2424 Erwin Rd, Ste. 405, 27710, Durham, United States of America                   | Swamy, Dr Geeta                    | 28-Mar-2013                        |
| 8556                | Copernicus Group IRB, One Triangle Drive, Suite 100, Research Triangle Park, 27709, Durham, United States of America  | Veit, Dr Glenn                     | 29-May-2013                        |
| 8557                | Kaiser Permanente Southern California IRB, 393 E Walnut Street, 91188, Pasadena, United States of America             | Ayala, Armida                      | 16-Apr-2013                        |
| 8559                | Copernicus Group IRB, One Triangle Drive, Suite 100, Research Triangle Park, 27709, Durham, United States of America  | Veit, Dr Glenn                     | 29-Jan-2013                        |
| 8560                | Washington V.A. Medical Center IRB, 50 Irving St. NW, Rm. 151-E, 20422, Washington, United States of America          | Gibert, Cynthia                    | 13-May-2013                        |

| <b>Country Name</b> | <b>Country IRB/IEC Name and Address</b>                                                                              | <b>Chairman of Country IRB/IEC</b> | <b>Country IRB/IEC Actual Date</b> |
|---------------------|----------------------------------------------------------------------------------------------------------------------|------------------------------------|------------------------------------|
| 8561                | Copernicus Group IRB, One Triangle Drive, Suite 100, Research Triangle Park, 27709, Durham, United States of America | Veit, Dr Glenn                     | 28-Jan-2013                        |
| 8562                | Copernicus Group IRB, One Triangle Drive, Suite 100, PO Box 110605, 27709, Durham, United States of America          | Veit, Dr Glenn                     | 25-Feb-2013                        |
| 8565                | Copernicus Group IRB, One Triangle Drive, Suite 100, PO Box 110605, 27709, Durham, United States of America          | Veit, Dr Glenn                     | 27-Feb-2013                        |
| 8567                | Copernicus Group IRB, One Triangle Drive, Suite 100, PO Box 110605, 27709, Durham, United States of America          | Veit, Dr Glenn                     | 22-Apr-2013                        |
| 8568                | Copernicus Group IRB, One Triangle Drive, Suite 100, Research Triangle Park, 27709, Durham, United States of America | Veit, Dr Glenn                     | 29-Mar-2013                        |
| 8569                | Copernicus Group IRB, One Triangle Drive, Suite 100, Research Triangle Park, 27709, Durham, United States of America | Veit, Dr Glenn                     | 27-Mar-2013                        |
| 8570                | Copernicus Group IRB, One Triangle Drive, Suite 100, Research Triangle Park, 27709, Durham, United States of America | Veit, Dr Glenn                     | 20-Feb-2013                        |
| 8571                | University of Utah IRB, 75 South 2000 E, 512 RAB Room 210, 84112, Salt Lake City, United States of America           | Treiman, Dr Gerald                 | 05-Jun-2013                        |
| 8572                | Copernicus Group IRB, One Triangle Drive, Suite 100, Research Triangle Park, 27709, Durham, United States of America | Veit, Dr Glenn                     | 14-Mar-2013                        |
| 8573                | Copernicus Group IRB, One Triangle Drive, Suite 100, Research Triangle Park, 27709, Durham, United States of America | Veit, Dr Glenn                     | 03-Apr-2013                        |
| 8575                | Copernicus Group IRB, One Triangle Drive, Suite 100, Research Triangle Park, 27709, Durham, United States of America | Veit, Dr Glenn                     | 21-Mar-2013                        |
| 8576                | EC Trinity Hospital, One Burdick Expy, W, 58701, Minot, United States of America                                     | Mattson, Steven                    | 08-Apr-2013                        |
| 8583                | Copernicus Group IRB, One Triangle Drive, Suite 100, Research Triangle Park, 27709, Durham, United States of America | Veit, Dr Glenn                     | 25-Mar-2013                        |

| <b>Country Name</b> | <b>Country IRB/IEC Name and Address</b>                                                                              | <b>Chairman of Country IRB/IEC</b> | <b>Country IRB/IEC Actual Date</b> |
|---------------------|----------------------------------------------------------------------------------------------------------------------|------------------------------------|------------------------------------|
| 8584                | Copernicus Group IRB, One Triangle Drive, Suite 100, Research Triangle Park, 27709, Durham, United States of America | Veit, Dr Glenn                     | 12-Apr-2013                        |
| 8585                | EC The Medical Group of Texas, 1001 12th Ave, Ste. 134, 76104, Fort Worth, United States of America                  | Parks, Mr Rickey                   | 21-Mar-2013                        |
| 8587                | Copernicus Group IRB, One Triangle Drive, Suite 100, Research Triangle Park, 27709, Durham, United States of America | Veit, Dr Glenn                     | 28-Mar-2013                        |
| 8589                | Copernicus Group IRB, One Triangle Drive, Suite 100, Research Triangle Park, 27709, Durham, United States of America | Veit, Dr Glenn                     | 28-Mar-2013                        |
| 8590                | Copernicus Group IRB, One Triangle Drive, Suite 100, Research Triangle Park, 27709, Durham, United States of America | Veit, Dr Glenn                     | 26-Mar-2013                        |
| 8592                | Copernicus Group IRB, One Triangle Drive, Suite 100, Research Triangle Park, 27709, Durham, United States of America | Veit, Dr Glenn                     | 09-Jun-2013                        |
| 8594                | Copernicus Group IRB, One Triangle Drive, Suite 100, Research Triangle Park, 27709, Durham, United States of America | Veit, Dr Glenn                     | 02-May-2013                        |
| 8596                | Copernicus Group IRB, One Triangle Drive, Suite 100, Research Triangle Park, 27709, Durham, United States of America | Veit, Dr Glenn                     | 09-Apr-2013                        |
| 8597                | Cooper University Hospital IRB, 401 Haddon Ave, 08103, Camden, United States of America                              | Warshal, Dr David                  | 20-Jun-2013                        |
| 8598                | Western Institutional Review Board, 1019 39th Ave SE, Suite 120, 98374, Puyallup, United States of America           | Schultz, Dr Theodore               | 14-May-2013                        |
| 8601                | Copernicus Group IRB, One Triangle Drive, Suite 100, Research Triangle Park, 27709, Durham, United States of America | Veit, Dr Glenn                     | 15-Apr-2013                        |
| 8602                | Copernicus Group IRB, One Triangle Drive, Suite 100, Research Triangle Park, 27709, Durham, United States of America | Veit, Dr Glenn                     | 29-Jul-2013                        |
| 8603                | Copernicus Group IRB, One Triangle Drive, Suite 100, Research Triangle Park, 27709, Durham, United States of America | Veit, Dr Glenn                     | 02-May-2013                        |

| <b>Country Name</b> | <b>Country IRB/IEC Name and Address</b>                                                                                                       | <b>Chairman of Country IRB/IEC</b> | <b>Country IRB/IEC Actual Date</b> |
|---------------------|-----------------------------------------------------------------------------------------------------------------------------------------------|------------------------------------|------------------------------------|
| 8607                | EC Saint Michael's Medical Center, 111 Central Ave, 07102, Newark, United States of America                                                   | Costeas, Dr Constantinos           | 21-May-2013                        |
| 8609                | Copernicus Group IRB, One Triangle Drive, Suite 100, Research Triangle Park, 27709, Durham, United States of America                          | Brennan, Mike                      | 07-Aug-2013                        |
| 8610                | EC University of Mississippi Medical Center, 2500 N State St, 39216, Jackson, United States of America                                        | Marshall, Dr Gailen                | 01-Aug-2013                        |
| 8615                | The Methodist Hospital Research Institute IRB, Institutional Review Board, 6565 Fannin St, MGB-4000, 77030, Houston, United States of America | Miller, Dr Susan                   | 24-Jul-2013                        |
| 8617                | EC Center for Vascular Medicine, 7300 Hanover Dr, Ste. 104, 20770, Greenbelt, United States of America                                        | Monickam, Dr Amalsun               | 29-Jul-2013                        |
| 8618                | Copernicus Group IRB, One Triangle Drive, Suite 100, Research Triangle Park, 27709, Durham, United States of America                          | Veit, Dr Glenn                     | 05-Jun-2014                        |
| Vietnam<br>8401     | BV Gia Dinh - Hoi Dong Dao Duc, 01 No Trang Long Street, Binh Thanh District, Hochiminh, Vietnam                                              | Dung, Dr Nguyen                    | 29-Oct-2012                        |
| 8402                | Director Board, Gia Dinh People Hospital, No 1, No Trang Long Street, Binh Thanh District, Hochiminh, Vietnam                                 | Dung, Dr Nguyen                    | 29-Oct-2012                        |
| 8402                | Cho Ray Hospital Ethics Committee, Cho Ray hosp, 201B Nguyen Chi Thanh, District 5, 9000, Ho Chi Minh City, Vietnam                           | Nguyen, Professor Van Khoi         | 17-Jan-2013                        |
| 8403                | Thong Nhat Hospital Ethics Committee, 01 Ly Thuong Kiet Str, Tan Binh Dist, Ho Chi Minh, Vietnam                                              | Nguyen, Dr. Cong                   | 22-Oct-2012                        |
| 8404                | 115 People's Hospital - IEC, 527 Su Van Hanh, District 10, 9000, Hochiminh, Vietnam                                                           | Nguyen, Dr. Anh                    | 11-Dec-2012                        |
| 8405                | 115 People's Hospital - IEC, 527 Su Van Hanh, District 10,9000, Hochiminh, Vietnam                                                            | Nguyen, Dr. Anh                    | 11-Dec-2012                        |

### 12.1.3.2 Samples of written Subject Information and Consent Form

| <b>Country</b> | <b>ICF with v.number and centre number</b> | <b>Date</b>   |
|----------------|--------------------------------------------|---------------|
| Master         | Master Informed Consent Form v.2 except US | 18 Sept 2012  |
|                | Master Informed Consent Form v.2 US        | 18 Sept 2012  |
|                | Addendum                                   | 14 April 2015 |
| Brazil         | Local v.1.2                                | 3 Jan 2013    |
|                | Backtranslation Local v.1.2                | 3 Jan 2013    |
| France         | Local v.1                                  | 19 Sept 2012  |
|                | Backtranslation Local v.1                  | 23 Nov 2012   |
| Germany        | Local v.2, all sites                       | 12 Nov 2012   |
|                | Backtranslation Local v.2, all sites       | 12 Nov 2012   |
|                | Local v.2.2, all sites                     | 2 Apr 2013    |
|                | Backtranslation Local v.2.2, all sites     | 2 April 2013  |
|                | Local v.2.3, all sites                     | 31 Oct 2013   |
|                | Backtranslation Local v.2.3, all sites     | 28 Oct 2013   |
| Japan          | Local v.1                                  | 30 Oct 2012   |
|                | Back translation Local v.1                 | 30 Oct 2012   |
|                | Local v.2                                  | 11 Nov 2013   |
|                | Back translation Local v.2                 | 11 Nov 2013   |
|                | Local v.5                                  | 11 Aug 2015   |
|                | Back translation Local v.5                 | 11 Aug 2015   |
| Netherlands    | Local v.2                                  | 18 Sept 2012  |
|                | Backtranslation Local v.2                  | 18 Sept 2012  |
| Poland         | Local v.1                                  | 25 Sept 2012  |
|                | Backtranslation Local v.1                  | 25 Sept 2012  |
|                | Local v.1                                  | 25 Sept 2012  |
|                | Backtranslation Local v.1                  | 25 Sept 2012  |
| Romania        | Local v.1                                  | 5 Sept 2012   |
|                | Backtranslation Local v.1                  | 5 Sept 2012   |
|                | Local v.2                                  | 30 Sept 2012  |
|                | Backtranslation Local v.2                  | 30 Sept 2012  |
| Slovakia       | Local v.1                                  | 14 Aug 2012   |
|                | Backtranslation Local v.1                  | 14 Aug 2012   |

| <b>Country</b> | <b>ICF with v.number and centre number</b> | <b>Date</b>       |
|----------------|--------------------------------------------|-------------------|
|                | Local v.2                                  | 20 Sept 2012      |
|                | Backtranslation Local v.2                  | 22 Oct 2012       |
| Spain          | Local v.1                                  | 22 June 2012      |
|                | Backtranslation Local v.1                  | 22 June 2012      |
|                | Local v.2                                  | 17 Oct 2012       |
|                | Backtranslation Local v.2                  | 17 Oct 2012       |
|                | Pregnant Research Addendum                 | 17 Oct 2012       |
|                | Backtranslation Pregnant Research Addendum | 17 Oct 2012       |
| South Korea    | Local v.1, all centres                     | 24 August 2012    |
|                | Backtranslation Local v.1, all sites       | 24 August 2012    |
|                | Local v.1, all centres                     | 27 September 2012 |
|                | Backtranslation Local v.1, all sites       | 27 September 2012 |
|                | Site Number 6004 v.1                       | 21 November 2012  |
|                | Backtranslation Site Number 6004 v.1       | 21 November 2012  |
|                | Site Number 6006 v.1                       | 18 December 2012  |
|                | Backtranslation Site Number 6006 v.1       | 18 December 2012  |
|                | Site Number 6007 v.1                       | 4 February 2013   |
|                | Backtranslation Site Number 6007 v.1       | 4 February 2013   |
|                | Site Number 6011 v.1                       | 17 September 2013 |
|                | Backtranslation Site Number 6011 v.1       | 17 September 2013 |
|                | Site Number 6012 v.1                       | 05 September 2013 |
|                | Backtranslation Site Number 6012 v.1       | 05 September 2013 |
|                | Site Number 6013 v.2                       | 16 September 2013 |
|                | Backtranslation Site Number 6013 v.2       | 16 September 2013 |
| Turkey         | Local v.2                                  | 21 June 2012      |
|                | Backtranslation Local v.2                  | 22 June 2012      |
|                | Local v.3                                  | 3 Jan 2013        |
|                | Backtranslation Local v.3                  | 3 Jan 2013        |
| UK             | Local v.2.0                                | 14 Nov 2012       |
| Vietnam        | Local v.2.1                                | 17 Jan 2013       |
|                | Backtranslation Local v.2.1                | 17 Jan 2013       |
